# Supplementary material for: [3 + 2] cycloaddition of nonstabilized azomethine ylides and 2-benzothiazolamines to access imidazolidine derivatives
Source: Royal Society of Chemistry journal article supplement (doi:10.1039/d2ra04616d), 2022-01-01

# **[3+2] Cycloaddition of nonstabilized azomethine ylides and 2-benzothiazolimines to access imidazolidine derivatives**

Kai-Kai Wang,<sup>a,b</sup> Yan-Li Li,<sup>c</sup> Ming-Yue Wang,<sup>a</sup> Jun Jing,<sup>a</sup> Zhan-Yong Wang<sup>\*a</sup> and Rongxiang Chen<sup>\*a</sup>

<sup>a</sup> School of Pharmacy, Xinxiang University, Xinxiang 453000, P.R. of China

<sup>b</sup> Key Laboratory of Nano-carbon Modified Film Technology Engineering of Henan Province, Xinxiang 453000, P.R. of China.

<sup>c</sup> Medical College, Xinxiang University, Xinxiang 453000, P.R. of China

E-mail: chenhlmei@163.com (R. Chen) and zhanyongw@126.com (Z. Wang)

## **Supporting Information**

### **Table of Contents**

- 1. General methods**
- 2. Some substrates of 2-benzothiazolimines and 2-benzoxazolimine 1**
- 3. General procedure for synthesis of imidazolidine derivatives 3**
- 4. Procedure for preparation of compound 4**
- 5. Crystal data and structural refinement for 3h**
- 6. NMR spectra**

## 1. General methods

NMR data were obtained for  $^1\text{H}$  at 400 MHz, and for  $^{13}\text{C}$  at 100 MHz, and  $^{19}\text{F}$  at 376 MHz. Chemical shifts were reported in ppm from tetramethylsilane with the solvent resonance as the internal standard in  $\text{CDCl}_3$  solution. ESI HRMS was recorded on a Waters SYNAPT G2. Column chromatography was performed on silica gel (200-300 mesh) eluting with ethyl acetate/petroleum ether. TLC was performed on glass-backed silica plates. UV light,  $\text{I}_2$ , and solution of potassium permanganate were used to visualize products. All chemicals were used without purification as commercially available unless otherwise noted. Petroleum ether and ethyl acetate were distilled. THF was freshly distilled from sodium/benzophenone. Unless otherwise noted, experiments involving moisture and/or air sensitive components were performed under a positive pressure of argon in oven-dried glassware equipped with a rubber septum inlet. Dried solvents and liquid reagents were transferred by oven-dried syringes. The 2-benzothiazolimines and 2-benzoxazolimines **1** were prepared according to the literature procedures.

- (1) (a) Liu, Si-Jia; Chen, Zhi-Han; Chen, Jia-Yi; Ni, Shao-Fei; Zhang, Yu-Chen; Shi, Feng. Rational Design of Axially Chiral Styrene-Based Organocatalysts and Their Application in Catalytic Asymmetric (2+4) Cyclizations. *Angew. Chem., Int. Ed.* **2022**, *61*, e202112226. (b) Jarrige, Lucie; Glavač, Danijel; Levitre, Guillaume; Retailleau, Pascal; Bernadat, Guillaume; Neuville, Luc; Masson, Géraldine. Chiral phosphoric acid-catalyzed enantioselective construction of structurally diverse benzothiazolopyrimidines. *Chem. Sci.* **2019**, *10*, 3765-3769. (c) Ni, Qijian; Wang, Xuyang; Xu, Fangfang; Chen, Xiaoyun; Song, Xiaoxiao. Organocatalytic asymmetric [4+2] cyclization of 2-benzothiazolimines with azlactones: access to chiral benzothiazolopyrimidine derivatives. *Chem. Commun.* **2020**, *56*, 3155-3158. (d) Ke, Chaoqi; Liu, Zhenzhong; Ruan, Sai; Feng, Xiaoming; Liu, Xiaohua. Organocatalytic asymmetric synthesis of benzothiazolopyrimidines via a [4 + 2] cycloaddition of azlactones with 2-benzothiazolimines. *Org. Chem. Front.* **2021**, *8*, 5705-5709. (e) Frías, María; Carrasco, Ana Cristina; Fraile, Alberto; Alemán, José. A General Asymmetric Formal Synthesis of Aza-Baylis–Hillman Type Products under Bifunctional Catalysis. *Chem. Eur. J.* **2018**, *24*, 3117-3121.

## 2. Some substrates of 2-benzothiazolimines and 2-benzoxazolimine **1**

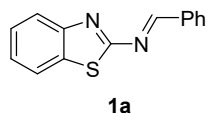

**(E)-N-(benzo[d]thiazol-2-yl)-1-phenylmethanimine (1a)**,  $^1\text{H}$  NMR (400 MHz,  $\text{CDCl}_3$ )  $\delta$  9.08 (s, 1H), 8.03 (d,  $J = 7.6$  Hz, 2H), 7.99 (d,  $J = 8.0$  Hz, 1H), 7.84 (d,  $J = 8.0$  Hz, 1H), 7.60 – 7.56 (m, 1H), 7.53 – 7.46 (m, 3H), 7.37 (t,  $J = 7.6$  Hz, 1H) ppm.

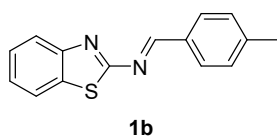

**1b**,  $^1\text{H}$  NMR (400 MHz,  $\text{CDCl}_3$ )  $\delta$  9.03 (s, 1H), 7.97 (d,  $J = 8.0$  Hz, 1H), 7.93 (d,  $J = 7.6$  Hz, 2H), 7.83 (d,  $J = 8.0$  Hz, 1H), 7.47 (t,  $J = 7.6$  Hz, 1H), 7.38 – 7.31 (m, 3H), 2.45 (s, 3H) ppm.

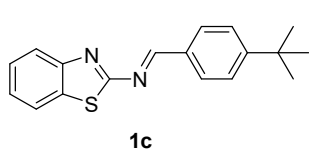

**1c**,  $^1\text{H NMR}$  (400 MHz,  $\text{CDCl}_3$ )  $\delta$  9.03 (s, 1H), 7.98 – 7.95 (m, 3H), 7.83 (d,  $J$  = 8.0 Hz, 1H), 7.53 (d,  $J$  = 7.6 Hz, 2H), 7.47 (t,  $J$  = 7.6 Hz, 1H), 7.35 (t,  $J$  = 7.6 Hz, 1H), 1.37 (s, 9H) ppm.

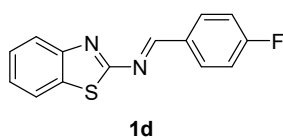

**1d**,  $^1\text{H NMR}$  (400 MHz,  $\text{CDCl}_3$ )  $\delta$  9.05 (s, 1H), 8.05 (dd,  $J$  = 8.0, 6.0 Hz, 2H), 7.98 (d,  $J$  = 8.0 Hz, 1H), 7.84 (d,  $J$  = 8.0 Hz, 1H), 7.48 (t,  $J$  = 7.6 Hz, 1H), 7.37 (t,  $J$  = 7.2 Hz, 1H), 7.20 (t,  $J$  = 8.8 Hz, 2H) ppm.

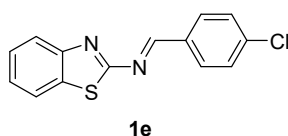

**1e**,  $^1\text{H NMR}$  (400 MHz,  $\text{CDCl}_3$ )  $\delta$  9.06 (s, 1H), 7.97 (d,  $J$  = 8.4 Hz, 3H), 7.84 (d,  $J$  = 8.0 Hz, 1H), 7.50 – 7.47 (m, 3H), 7.37 (t,  $J$  = 7.6 Hz, 1H) ppm.

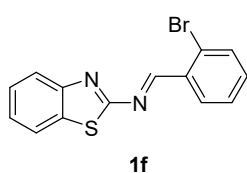

**1f**,  $^1\text{H NMR}$  (400 MHz,  $\text{CDCl}_3$ )  $\delta$  9.45 (s, 1H), 8.37 (d,  $J$  = 7.6 Hz, 1H), 8.01 (d,  $J$  = 8.0 Hz, 1H), 7.84 (d,  $J$  = 8.0 Hz, 1H), 7.67 (d,  $J$  = 8.0 Hz, 1H), 7.51 – 7.36 (m, 4H) ppm.

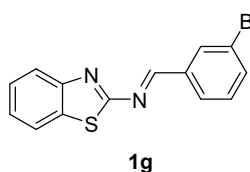

**1g**,  $^1\text{H NMR}$  (400 MHz,  $\text{CDCl}_3$ )  $\delta$  9.04 (s, 1H), 8.22 (s, 1H), 7.99 (d,  $J$  = 8.0 Hz, 1H), 7.91 (d,  $J$  = 7.6 Hz, 1H), 7.84 (d,  $J$  = 8.0 Hz, 1H), 7.69 (d,  $J$  = 8.0 Hz, 1H), 7.49 (t,  $J$  = 8.0 Hz, 1H), 7.40 – 7.37 (m, 2H) ppm.

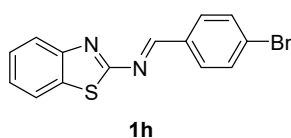

**1h**,  $^1\text{H NMR}$  (400 MHz,  $\text{CDCl}_3$ )  $\delta$  9.04 (s, 1H), 7.98 (d,  $J$  = 8.0 Hz, 1H), 7.89 (d,  $J$  = 8.0 Hz, 2H), 7.84 (d,  $J$  = 8.0 Hz, 1H), 7.66 (d,  $J$  = 8.0 Hz, 2H), 7.49 (t,  $J$  = 7.6 Hz, 1H), 7.38 (t,  $J$  = 7.6 Hz, 1H) ppm.

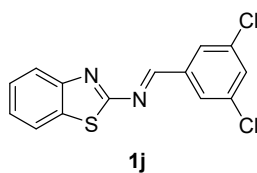

**1j**,  $^1\text{H NMR}$  (400 MHz,  $\text{CDCl}_3$ )  $\delta$  8.99 (s, 1H), 7.98 (d,  $J$  = 8.4 Hz, 1H), 7.88 (s, 2H), 7.84 (d,  $J$  = 8.0 Hz, 1H), 7.52 – 7.47 (m, 2H), 7.38 (t,  $J$  = 7.6 Hz, 1H) ppm.

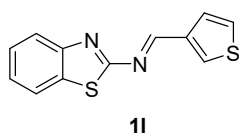

**1i**,  $^1\text{H NMR}$  (400 MHz,  $\text{CDCl}_3$ )  $\delta$  9.06 (s, 1H), 8.06 – 8.05 (m, 1H), 7.96 (d,  $J$  = 8.0 Hz, 1H), 7.83 (d,  $J$  = 8.0 Hz, 1H), 7.77 (d,  $J$  = 4.8 Hz, 1H), 7.47 (t,  $J$  = 7.6 Hz, 1H), 7.43 – 7.41 (m, 1H), 7.36 (t,  $J$  = 7.6 Hz, 1H) ppm.

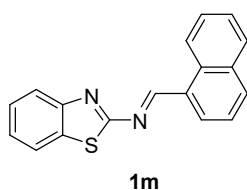

**1m**,  $^1\text{H NMR}$  (400 MHz,  $\text{CDCl}_3$ )  $\delta$  9.67 (s, 1H), 9.21 (d,  $J$  = 8.4 Hz, 1H), 8.24 (d,  $J$  = 6.8 Hz, 1H), 8.04 (dd,  $J$  = 14.4, 8.4 Hz, 2H), 7.93 (d,  $J$  = 8.0 Hz, 1H), 7.85 (d,  $J$  = 8.0 Hz, 1H), 7.70 (t,  $J$  = 7.2 Hz, 1H), 7.62 – 7.58 (m, 2H), 7.49 (t,  $J$  = 7.2 Hz, 1H), 7.37 (t,  $J$  = 7.6 Hz, 1H) ppm.

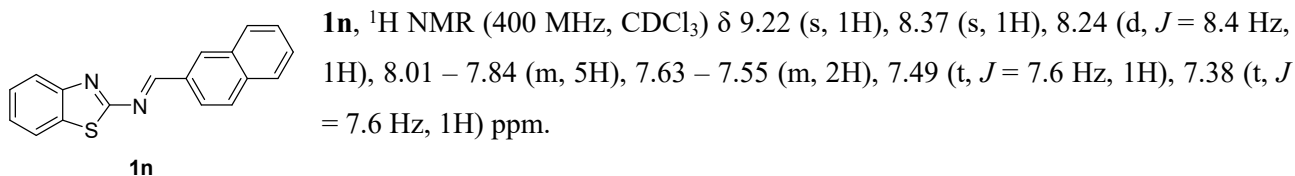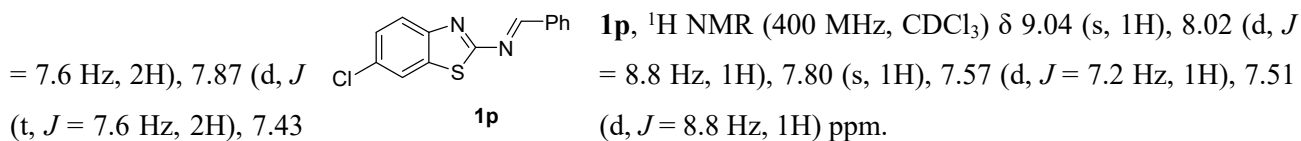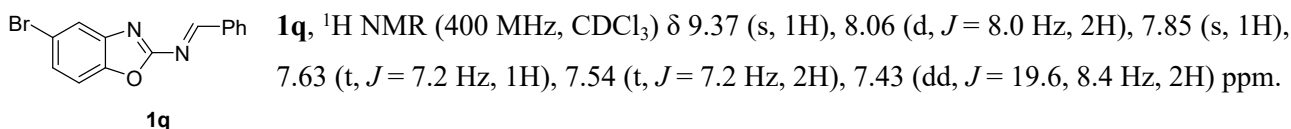

### 3. General procedure for synthesis of imidazolidine derivatives **3**

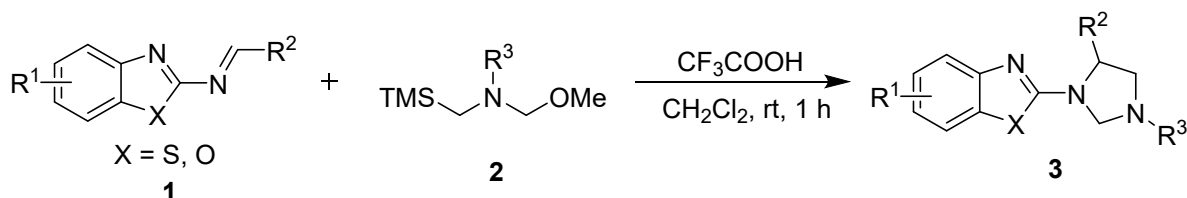

To a solution of 2-benzothiazolimines or 2-benzoxazolimines **1** (0.1 mmol), *N*-alkyl-*N*-(methoxymethyl)-*N*-trimethylsilylmethylamine **2** (0.12 mmol) in  $\text{CH}_2\text{Cl}_2$  (1 mL) was added TFA (0.01 mmol). The solution was stirred at rt for 1 h. After completion, saturated sodium bicarbonate solution (1 mL) was added and the mixture was extracted with  $\text{CH}_2\text{Cl}_2$  ( $3 \times 1$  mL). The combined organic layers were dried and concentrated under reduced pressure followed by silica gel column chromatography purification (petroleum ether/ethyl acetate = 6:1 to 5:1) to give the products **3**.

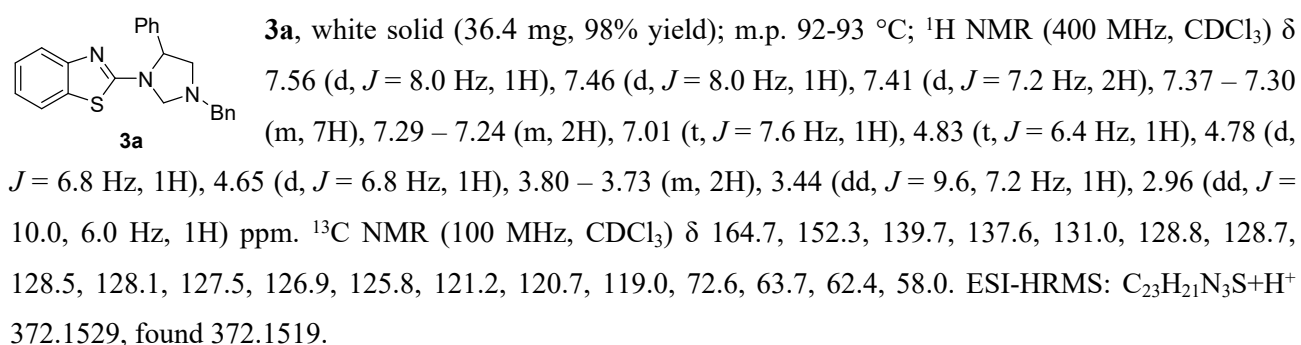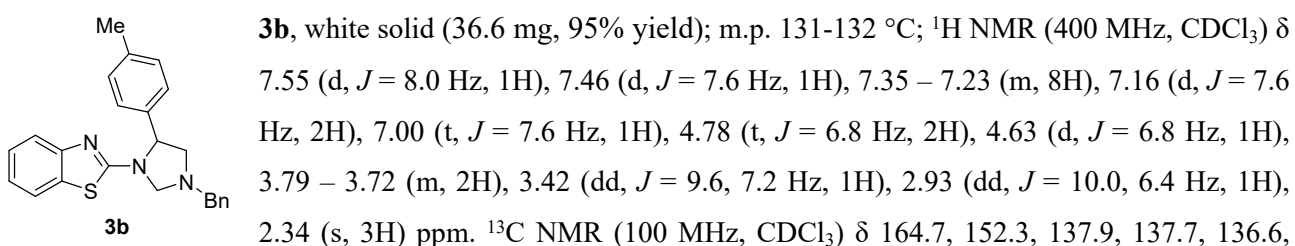

131.0, 129.5, 128.7, 128.5, 127.5, 126.9, 125.8, 121.2, 120.7, 119.0, 72.6, 63.5, 62.5, 58.0, 21.2 ppm. ESI-HRMS:  $C_{24}H_{23}N_3S+H^+$  386.1685, found 386.1675.

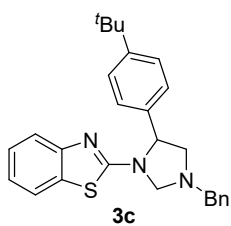

**3c**, white solid (41.0 mg, 96% yield); m.p. 100-101 °C;  $^1H$  NMR (400 MHz,  $CDCl_3$ )  $\delta$  7.56 (d,  $J = 8.0$  Hz, 1H), 7.48 (d,  $J = 7.6$  Hz, 1H), 7.38 – 7.31 (m, 8H), 7.28 (d,  $J = 6.9$  Hz, 1H), 7.23 (s, 1H), 7.01 (t,  $J = 7.6$  Hz, 1H), 4.82 – 4.77 (m, 2H), 4.63 (d,  $J = 6.8$  Hz, 1H), 3.79 (d,  $J = 13.2$  Hz, 1H), 3.73 (d,  $J = 12.8$  Hz, 1H), 3.43 (dd,  $J = 10.0, 7.2$  Hz, 1H), 2.96 (dd,  $J = 10.0, 6.4$  Hz, 1H), 1.31 (s, 9H) ppm.  $^{13}C$  NMR (100 MHz,  $CDCl_3$ )  $\delta$  164.9, 152.3, 151.0, 137.7, 136.5, 131.0, 128.7, 128.5, 127.5, 126.6, 125.8, 125.7, 121.2, 120.7, 119.0, 72.6, 63.4, 62.4, 58.0, 34.6, 31.3 ppm. ESI-HRMS:  $C_{27}H_{29}N_3S+H^+$  428.2155, found 428.2144.

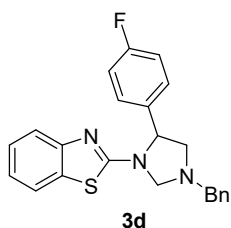

**3d**, white solid (37.7 mg, 97% yield); m.p. 94-95 °C;  $^1H$  NMR (400 MHz,  $CDCl_3$ )  $\delta$  7.56 (d,  $J = 8.0$  Hz, 1H), 7.49 (d,  $J = 8.0$  Hz, 1H), 7.39 (dd,  $J = 8.4, 5.6$  Hz, 2H), 7.34 – 7.25 (m, 6H), 7.06 – 7.01 (m, 3H), 4.82 (t,  $J = 6.0$  Hz, 1H), 4.67 (q,  $J = 6.8$  Hz, 2H), 3.80 – 3.73 (m, 2H), 3.39 (dd,  $J = 10.0, 7.2$  Hz, 1H), 2.94 (dd,  $J = 10.0, 6.0$  Hz, 1H) ppm.  $^{13}C$  NMR (100 MHz,  $CDCl_3$ )  $\delta$  164.5, 162.5 (d,  $J = 245.1$  Hz), 152.3, 137.5, 135.6 (d,  $J = 3.1$  Hz), 130.9, 128.7, 128.6, 127.6, 125.9, 121.4, 120.7, 119.2, 115.7 (d,  $J = 21.5$  Hz), 72.5, 63.1, 62.2, 57.9 ppm.  $^{19}F$  NMR (376 MHz,  $CDCl_3$ )  $\delta$  -114.1 ppm. ESI-HRMS:  $C_{23}H_{20}FN_3S+H^+$  390.1435, found 390.1424.

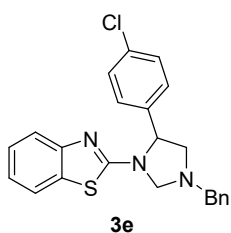

**3e**, white solid (38.9 mg, 96% yield); m.p. 93-94 °C;  $^1H$  NMR (400 MHz,  $CDCl_3$ )  $\delta$  7.56 (d,  $J = 8.0$  Hz, 1H), 7.49 (d,  $J = 7.6$  Hz, 1H), 7.37 – 7.25 (m, 10H), 7.03 (t,  $J = 7.6$  Hz, 1H), 4.82 (t,  $J = 6.0$  Hz, 1H), 4.68 – 4.64 (m, 2H), 3.80 – 3.73 (m, 2H), 3.39 (dd,  $J = 9.6, 7.2$  Hz, 1H), 2.93 (dd,  $J = 9.6, 5.2$  Hz, 1H) ppm.  $^{13}C$  NMR (100 MHz,  $CDCl_3$ )  $\delta$  164.4, 152.3, 138.5, 137.5, 133.8, 130.9, 129.0, 128.65, 128.57, 128.3, 127.6, 126.0, 121.4, 120.7, 119.2, 72.5, 63.1, 62.0, 57.9 ppm. ESI-HRMS:  $C_{23}H_{20}ClN_3S+H^+$  406.1139, found 406.1129.

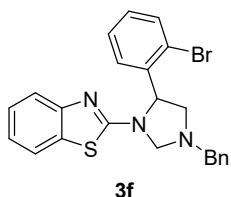

**3f**, white solid (42.7 mg, 95% yield); m.p. 106-107 °C;  $^1H$  NMR (400 MHz,  $CDCl_3$ )  $\delta$  7.58 (t,  $J = 6.8$  Hz, 2H), 7.49 (d,  $J = 8.0$  Hz, 1H), 7.43 – 7.41 (m, 1H), 7.32 – 7.25 (m, 7H), 7.18 – 7.14 (m, 1H), 7.03 (t,  $J = 7.2$  Hz, 1H), 5.25 (t,  $J = 6.4$  Hz, 1H), 4.71 (q,  $J = 6.4$  Hz, 2H), 3.81 – 3.73 (m, 2H), 3.55 (dd,  $J = 10.0, 7.2$  Hz, 1H), 2.97 (dd,  $J = 10.4, 5.2$  Hz, 1H) ppm.  $^{13}C$  NMR (100 MHz,  $CDCl_3$ )  $\delta$  164.6, 152.5, 138.7, 137.5, 133.0, 131.0, 129.4, 128.7, 128.5, 128.0, 127.7, 127.6, 125.9, 122.8, 121.4, 120.8, 119.2, 72.5, 63.4, 60.4, 57.9 ppm. ESI-HRMS:  $C_{23}H_{20}BrN_3S+H^+$  450.0634 ( $^{79}Br$ ) and 452.0614 ( $^{81}Br$ ), found 450.0625, 452.0602.

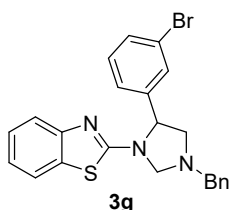

**3g**, white solid (43.1 mg, 96% yield); m.p. 119-120 °C;  $^1H$  NMR (400 MHz,  $CDCl_3$ )  $\delta$  7.57 (d,  $J = 7.6$  Hz, 2H), 7.50 (d,  $J = 7.6$  Hz, 1H), 7.43 (d,  $J = 8.0$  Hz, 1H), 7.34 – 7.25 (m, 7H), 7.22 (t,  $J = 8.0$  Hz, 1H), 7.04 (t,  $J = 7.2$  Hz, 1H), 4.81 (t,  $J = 6.0$  Hz, 1H), 4.66 (q,  $J = 6.4$  Hz, 2H), 3.80 – 3.73 (m, 2H), 3.40 (dd,  $J = 10.0, 7.2$  Hz, 1H), 2.95 (dd,  $J =$

10.0, 5.6 Hz, 1H) ppm.  $^{13}\text{C}$  NMR (100 MHz,  $\text{CDCl}_3$ )  $\delta$  164.5, 152.3, 142.5, 137.5, 131.2, 131.0, 130.3, 129.9, 128.7, 128.6, 127.6, 126.0, 125.5, 122.9, 121.5, 120.8, 119.3, 72.5, 63.2, 61.9, 57.8 ppm. ESI-HRMS:  $\text{C}_{23}\text{H}_{20}\text{BrN}_3\text{S}+\text{H}^+$  450.0634 ( $^{79}\text{Br}$ ) and 452.0614 ( $^{81}\text{Br}$ ), found 450.0624, 452.0602.

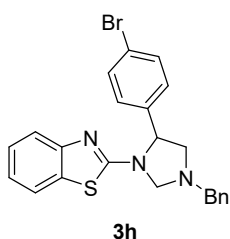

**3h**, white solid (44.0 mg, 98% yield); m.p. 114-115 °C;  $^1\text{H}$  NMR (400 MHz,  $\text{CDCl}_3$ )  $\delta$  7.56 (d,  $J$  = 8.0 Hz, 1H), 7.49 – 7.45 (m, 3H), 7.32 – 7.23 (m, 8H), 7.02 (t,  $J$  = 7.6 Hz, 1H), 4.79 (t,  $J$  = 6.0 Hz, 1H), 4.64 (s, 2H), 3.77 – 3.70 (m, 2H), 3.38 – 3.33 (m, 1H), 2.91 (dd,  $J$  = 9.6, 5.2 Hz, 1H) ppm.  $^{13}\text{C}$  NMR (100 MHz,  $\text{CDCl}_3$ )  $\delta$  164.4, 152.4, 139.2, 137.5, 131.9, 131.0, 128.7, 128.63, 128.61, 127.6, 126.0, 121.9, 121.5, 120.8, 119.3,

72.5, 63.2, 61.9, 57.9 ppm. ESI-HRMS:  $\text{C}_{23}\text{H}_{20}\text{BrN}_3\text{S}+\text{H}^+$  450.0634 ( $^{79}\text{Br}$ ) and 452.0614 ( $^{81}\text{Br}$ ), found 450.0625, 452.0603.

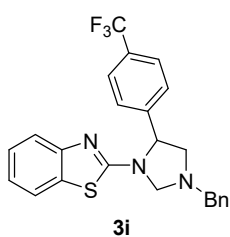

**3i**, white solid (41.7 mg, 95% yield); m.p. 98-99 °C;  $^1\text{H}$  NMR (400 MHz,  $\text{CDCl}_3$ )  $\delta$  7.62 – 7.49 (m, 6H), 7.33 – 7.24 (m, 6H), 7.04 (t,  $J$  = 7.6 Hz, 1H), 4.93 (t,  $J$  = 6.0 Hz, 1H), 4.65 (dd,  $J$  = 18.8, 6.4 Hz, 2H), 3.80 – 3.72 (m, 2H), 3.40 (dd,  $J$  = 9.6, 7.2 Hz, 1H), 2.96 (dd,  $J$  = 10.0, 5.2 Hz, 1H) ppm.  $^{13}\text{C}$  NMR (100 MHz,  $\text{CDCl}_3$ )  $\delta$  164.4, 152.4, 144.3, 137.4, 130.9, 130.2 (q,  $J$  = 32.0 Hz), 128.64, 128.60, 127.6, 127.1, 126.0, 125.8

(q,  $J$  = 3.6 Hz), 124.1 (q,  $J$  = 270.3 Hz), 121.6, 120.8, 119.3, 72.5, 63.3, 61.7, 57.8 ppm.  $^{19}\text{F}$  NMR (376 MHz,  $\text{CDCl}_3$ )  $\delta$  -62.5 ppm. ESI-HRMS:  $\text{C}_{24}\text{H}_{20}\text{F}_3\text{N}_3\text{S}+\text{H}^+$  440.1403, found 440.1393.

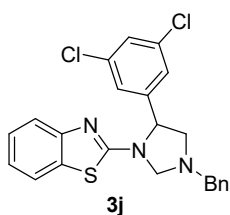

**3j**, white solid (42.6 mg, 97% yield); m.p. 148-149 °C;  $^1\text{H}$  NMR (400 MHz,  $\text{CDCl}_3$ )  $\delta$  7.59 – 7.53 (m, 2H), 7.34 – 7.25 (m, 9H), 7.07 (t,  $J$  = 7.6 Hz, 1H), 4.83 (t,  $J$  = 5.6 Hz, 1H), 4.65 (d,  $J$  = 6.4 Hz, 1H), 4.58 (d,  $J$  = 6.4 Hz, 1H), 3.80 – 3.73 (m, 2H), 3.39 – 3.34 (m, 1H), 2.95 (dd,  $J$  = 9.6, 5.2 Hz, 1H) ppm.  $^{13}\text{C}$  NMR (100 MHz,  $\text{CDCl}_3$ )  $\delta$  164.2, 152.3, 144.0, 137.3, 135.3, 130.9, 128.6, 128.1, 127.6, 126.0, 125.3, 121.6, 120.8,

119.4, 72.3, 62.8, 61.3, 57.6 ppm. ESI-HRMS:  $\text{C}_{23}\text{H}_{19}\text{Cl}_2\text{N}_3\text{S}+\text{H}^+$  440.0750, found 440.0741.

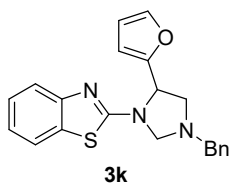

**3k**, white solid (33.2 mg, 92% yield); m.p. 53-54 °C;  $^1\text{H}$  NMR (400 MHz,  $\text{CDCl}_3$ )  $\delta$  7.58 – 7.53 (m, 2H), 7.40 (s, 1H), 7.36 – 7.25 (m, 6H), 7.05 (t,  $J$  = 7.6 Hz, 1H), 6.42 (d,  $J$  = 3.2 Hz, 1H), 6.36 (d,  $J$  = 1.2 Hz, 1H), 4.94 (t,  $J$  = 6.4 Hz, 1H), 4.69 (d,  $J$  = 6.8 Hz, 1H), 4.55 (d,  $J$  = 6.8 Hz, 1H), 3.78 (s, 2H), 3.37 (dd,  $J$  = 10.4, 7.2 Hz, 1H), 3.22 (dd,  $J$

= 10.4, 6.0 Hz, 1H) ppm.  $^{13}\text{C}$  NMR (100 MHz,  $\text{CDCl}_3$ )  $\delta$  164.5, 152.2, 151.7, 142.6, 137.6, 130.9, 128.7, 128.5, 127.5, 125.9, 121.4, 120.7, 119.2, 110.5, 108.9, 72.0, 58.6, 58.1, 56.9 ppm. ESI-HRMS:  $\text{C}_{21}\text{H}_{19}\text{N}_3\text{OS}+\text{H}^+$  362.1322, found 362.1312.

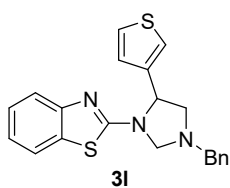

**3l**, white solid (35.4 mg, 94% yield); m.p. 104-105 °C;  $^1\text{H}$  NMR (400 MHz,  $\text{CDCl}_3$ )  $\delta$  7.56 (d,  $J$  = 8.0 Hz, 1H), 7.51 (d,  $J$  = 8.0 Hz, 1H), 7.37 – 7.28 (m, 8H), 7.14 (d,  $J$  = 4.8 Hz, 1H), 7.03 (t,  $J$  = 7.6 Hz, 1H), 4.95 (t,  $J$  = 6.0 Hz, 1H), 4.65 – 4.61 (m, 2H), 3.81 – 3.74 (m, 2H), 3.35 (dd,  $J$  = 10.0, 7.2 Hz, 1H), 3.03 (dd,  $J$  = 9.6, 5.2 Hz, 1H) ppm.  $^{13}\text{C}$

NMR (100 MHz, CDCl<sub>3</sub>)  $\delta$  164.5, 152.2, 140.9, 137.6, 130.9, 128.7, 128.5, 127.5, 126.6, 126.3, 125.9, 123.0, 121.3, 120.7, 119.0, 72.0, 61.1, 59.4, 58.0 ppm. ESI-HRMS: C<sub>21</sub>H<sub>19</sub>N<sub>3</sub>S<sub>2</sub>+H<sup>+</sup> 378.1093, found 378.1084.

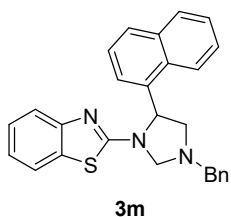

**3m**, white solid (44.4 mg, 96% yield); m.p. 116-117 °C; <sup>1</sup>H NMR (400 MHz, CDCl<sub>3</sub>)  $\delta$  8.01 (d, *J* = 8.0 Hz, 1H), 7.91 (d, *J* = 7.6 Hz, 1H), 7.81 (d, *J* = 8.0 Hz, 1H), 7.60 – 7.50 (m, 4H), 7.45 – 7.39 (m, 2H), 7.31 – 7.23 (m, 6H), 6.99 (t, *J* = 7.2 Hz, 1H), 5.65 (t, *J* = 6.0 Hz, 1H), 4.87 (d, *J* = 6.8 Hz, 1H), 4.75 (d, *J* = 6.8 Hz, 1H), 3.82 (d, *J* = 13.2 Hz, 1H), 3.76 (d, *J* = 13.2 Hz, 1H), 3.68 (dd, *J* = 9.6, 7.6 Hz, 1H), 3.04 (dd, *J* = 10.0,

5.6 Hz, 1H) ppm. <sup>13</sup>C NMR (100 MHz, CDCl<sub>3</sub>)  $\delta$  165.1, 152.5, 137.6, 134.7, 134.0, 131.1, 130.8, 129.3, 128.7, 128.5, 128.4, 127.5, 126.4, 125.9, 125.8, 125.7, 123.4, 122.4, 121.3, 120.7, 119.1, 72.4, 61.3, 61.1, 58.1 ppm. ESI-HRMS: C<sub>27</sub>H<sub>23</sub>N<sub>3</sub>S+H<sup>+</sup> 422.1685, found 422.1675.

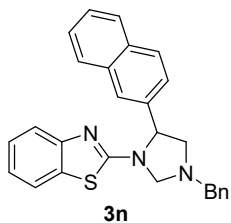

**3n**, white solid (40.0 mg, 95% yield); m.p. 107-108 °C; <sup>1</sup>H NMR (400 MHz, CDCl<sub>3</sub>)  $\delta$  7.86 – 7.81 (m, 4H), 7.57 – 7.46 (m, 5H), 7.39 – 7.30 (m, 4H), 7.28 – 7.22 (m, 2H), 6.99 (t, *J* = 7.6 Hz, 1H), 5.00 (t, *J* = 6.4 Hz, 1H), 4.83 (d, *J* = 6.8 Hz, 1H), 4.72 (d, *J* = 6.4 Hz, 1H), 3.83 – 3.76 (m, 2H), 3.50 (dd, *J* = 9.6, 7.2 Hz, 1H), 3.03 (dd, *J* = 10.0, 6.0 Hz, 1H) ppm. <sup>13</sup>C NMR (100 MHz, CDCl<sub>3</sub>)  $\delta$  164.8, 152.3, 137.6, 137.1, 133.3, 133.2,

131.0, 128.9, 128.7, 128.5, 127.9, 127.8, 127.5, 126.3, 126.2, 126.1, 125.8, 124.3, 121.3, 120.7, 119.1, 72.7, 63.9, 62.2, 58.0 ppm. ESI-HRMS: C<sub>27</sub>H<sub>23</sub>N<sub>3</sub>S+H<sup>+</sup> 422.1685, found 422.1676.

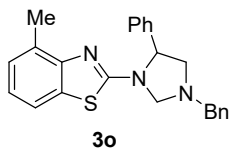

**3o**, white solid (36.6 mg, 95% yield); m.p. 43-44 °C; <sup>1</sup>H NMR (400 MHz, CDCl<sub>3</sub>)  $\delta$  7.42 (d, *J* = 7.6 Hz, 2H), 7.35 – 7.28 (m, 9H), 7.07 (d, *J* = 7.2 Hz, 1H), 6.92 (t, *J* = 7.6 Hz, 1H), 4.84 (t, *J* = 6.4 Hz, 2H), 4.62 (d, *J* = 6.8 Hz, 1H), 3.79 (d, *J* = 12.8 Hz, 1H), 3.73 (d, *J* = 12.8 Hz, 1H), 3.45 (dd, *J* = 10.0, 7.2 Hz, 1H), 2.95 (dd, *J* = 10.0, 6.8 Hz,

1H), 2.54 (s, 3H) ppm. <sup>13</sup>C NMR (100 MHz, CDCl<sub>3</sub>)  $\delta$  164.0, 151.5, 140.0, 137.8, 130.8, 129.0, 128.8, 128.7, 128.5, 127.9, 127.5, 126.9, 126.5, 121.1, 118.1, 72.6, 63.7, 62.4, 58.0, 18.3 ppm. ESI-HRMS: C<sub>24</sub>H<sub>23</sub>N<sub>3</sub>S+H<sup>+</sup> 386.1685, found 386.1678.

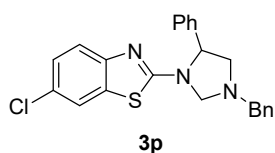

**3p**, white solid (38.9 mg, 96% yield); m.p. 87-88 °C; <sup>1</sup>H NMR (400 MHz, CDCl<sub>3</sub>)  $\delta$  7.45 – 7.27 (m, 12H), 7.20 (d, *J* = 8.8 Hz, 1H), 4.81 (t, *J* = 6.4 Hz, 1H), 4.74 (d, *J* = 6.4 Hz, 1H), 4.62 (d, *J* = 6.8 Hz, 1H), 3.80 – 3.73 (m, 2H), 3.44 (dd, *J* = 9.6, 7.6 Hz, 1H), 2.96 (dd, *J* = 10.0, 6.4 Hz, 1H) ppm. <sup>13</sup>C NMR (100 MHz, CDCl<sub>3</sub>)  $\delta$  164.7, 150.9, 139.3, 137.5,

132.2, 128.9, 128.7, 128.6, 128.2, 127.6, 126.9, 126.4, 126.3, 120.3, 119.6, 72.6, 63.7, 62.3 57.9 ppm. ESI-HRMS: C<sub>23</sub>H<sub>20</sub>ClN<sub>3</sub>S+H<sup>+</sup> 406.1139, found 406.1132.

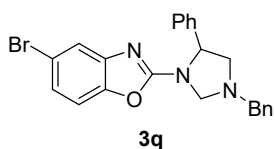

**3q**, white solid (40.7 mg, 94% yield); m.p. 99-100 °C; <sup>1</sup>H NMR (400 MHz, CDCl<sub>3</sub>)  $\delta$  7.43 – 7.26 (m, 11H), 7.07 (d, *J* = 8.4 Hz, 1H), 7.00 (d, *J* = 8.4 Hz, 1H), 5.15 (t, *J* = 6.4 Hz, 1H), 4.57 – 4.54 (m, 2H), 3.78 (d, *J* = 13.2 Hz, 1H), 3.72 (d, *J* =

13.2 Hz, 1H), 3.40 (dd,  $J = 10.0, 7.2$  Hz, 1H), 2.96 (dd,  $J = 10.0, 6.0$  Hz, 1H) ppm.  $^{13}\text{C}$  NMR (100 MHz,  $\text{CDCl}_3$ )  $\delta$  160.9, 148.0, 144.8, 140.8, 137.4, 128.7, 128.6, 127.7, 127.6, 126.2, 123.3, 119.5, 116.6, 110.0, 70.9, 61.7, 61.4, 57.8 ppm. ESI-HRMS:  $\text{C}_{23}\text{H}_{20}\text{BrN}_3\text{O}+\text{H}^+$  434.0863 ( $^{79}\text{Br}$ ) and 436.0842 ( $^{81}\text{Br}$ ), found 434.0853, 436.0831.

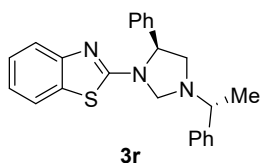

**3r**, white solid (36.6 mg, 95% yield); m.p. 61-62 °C;  $^1\text{H}$  NMR (400 MHz,  $\text{CDCl}_3$ )  $\delta$  7.56 (d,  $J = 8.0$  Hz, 1H), 7.44 (d,  $J = 7.6$  Hz, 1H), 7.40 (d,  $J = 7.6$  Hz, 2H), 7.36 – 7.29 (m, 7H), 7.27 – 7.23 (m, 2H), 7.00 (t,  $J = 7.6$  Hz, 1H), 4.82 (d,  $J = 6.0$  Hz, 1H), 4.77 (t,  $J = 6.0$  Hz, 1H), 4.49 (d,  $J = 5.6$  Hz, 1H), 3.45 (q,  $J = 6.4$  Hz, 1H), 3.27 – 3.23 (m, 1H), 2.82 (dd,  $J = 9.2, 6.0$  Hz, 1H), 1.42 (d,  $J = 6.4$  Hz, 3H) ppm.  $^{13}\text{C}$  NMR (100 MHz,  $\text{CDCl}_3$ )  $\delta$  164.6, 152.3, 144.0, 139.7, 131.0, 128.7, 128.6, 128.1, 127.5, 127.03, 126.99, 125.8, 121.2, 120.7, 119.0, 71.7, 64.4, 63.3, 61.2, 23.0 ppm. ESI-HRMS:  $\text{C}_{24}\text{H}_{23}\text{N}_3\text{S}+\text{H}^+$  386.1685, found 386.1676.

#### 4. Procedure for preparation of compound 4

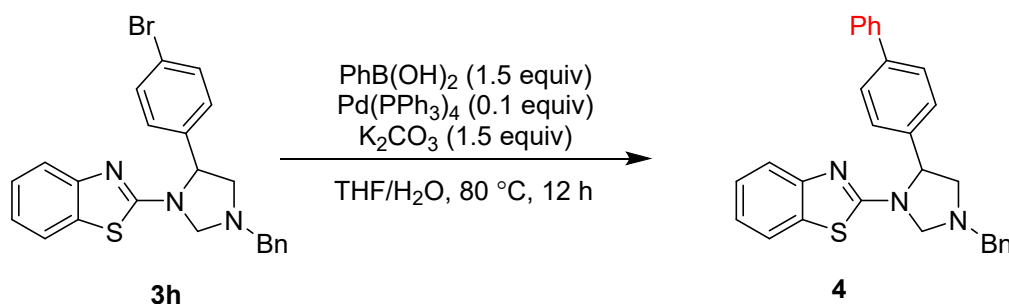

To a solution of **3h** (90 mg, 0.20 mmol) in THF/ $\text{H}_2\text{O}$  (2mL, 9:1) was added  $\text{Pd(PPh}_3)_4$  (20 mg, 0.02 mmol), phenylboronic acid (37 mg, 0.30 mmol), and  $\text{K}_2\text{CO}_3$  (41.4 mg, 0.3 mmol). The resulting mixture was stirred at 80 °C for 12 h under  $\text{N}_2$ . Upon completion of the reaction, water (5 mL) was added and the mixture was extracted with DCM ( $3 \times 5$  mL). The combined organic layers were dried and concentrated under reduced pressure followed by silica gel column chromatography purification (petroleum ether/ethyl acetate = 6:1) to give the product **4** (58.1 mg, 65% yield) as a white solid. m.p. 180-181 °C;  $^1\text{H}$  NMR (400 MHz,  $\text{CDCl}_3$ )  $\delta$  7.58 (d,  $J = 8.0$  Hz, 5H), 7.47 (d,  $J = 7.2$  Hz, 3H), 7.42 (t,  $J = 7.6$  Hz, 2H), 7.37 – 7.28 (m, 5H), 7.29 – 7.23 (m, 2H), 7.02 (t,  $J = 7.6$  Hz, 1H), 4.88 (t,  $J = 6.0$  Hz, 1H), 4.77 (d,  $J = 6.4$  Hz, 1H), 4.67 (d,  $J = 6.4$  Hz, 1H), 3.82 – 3.74 (m, 2H), 3.45 (dd,  $J = 9.6, 6.8$  Hz, 1H), 3.00 (dd,  $J = 10.0, 6.0$  Hz, 1H) ppm.  $^{13}\text{C}$  NMR (100 MHz,  $\text{CDCl}_3$ )  $\delta$  164.7), 152.3, 141.0, 140.6, 138.8, 137.6, 131.0, 128.8, 128.7, 128.5, 127.53, 127.49, 127.4, 127.1, 125.9, 121.3, 120.7, 119.1, 72.6, 63.5, 62.3, 58.0 ppm. ESI-HRMS: calcd. for  $\text{C}_{29}\text{H}_{25}\text{N}_3\text{S}+\text{H}^+$  448.1842, found 448.1832.



## 5. Crystal data and structural refinement for **3h**

**Preparation of Single Crystal.** Single crystal **3h** was obtained by the layer-to-layer diffusion method. Products **3h** were added to dichloromethane (1.0 mL), and stratified with *n*-hexane after 3 days to obtain crystals suitable for single-crystal X-ray diffraction.

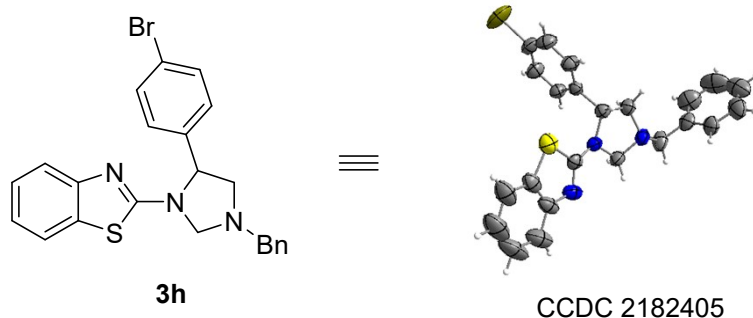

|                                      |                                                    |
|--------------------------------------|----------------------------------------------------|
| Identification code                  | <b>3h</b>                                          |
| Empirical formula                    | C <sub>23</sub> H <sub>20</sub> BrN <sub>3</sub> S |
| Formula weight                       | 450.39                                             |
| Temperature/K                        | 296                                                |
| Crystal system                       | triclinic                                          |
| Space group                          | P -1                                               |
| a/Å                                  | 9.0251(10)                                         |
| b/Å                                  | 11.4612(13)                                        |
| c/Å                                  | 11.5392(13)                                        |
| α/°                                  | 64.078(2)                                          |
| β/°                                  | 82.620(2)                                          |
| γ/°                                  | 83.522(2)                                          |
| Volume/Å <sup>3</sup>                | 1062.5(2)                                          |
| Z                                    | 2                                                  |
| ρ <sub>calc</sub> /g/cm <sup>3</sup> | 1.408                                              |
| μ/mm <sup>-1</sup>                   | 2.046                                              |
| F(000)                               | 460                                                |
| Crystal size/mm <sup>3</sup>         | 0.26 × 0.25 × 0.22                                 |
| Radiation                            | MoKα (λ = 0.71073)                                 |
| 2θ range for data collection/°       | 2.88 to 24.00                                      |

|                                            |                                                             |
|--------------------------------------------|-------------------------------------------------------------|
| Index ranges                               | $-10 \leq h \leq 10, -8 \leq k \leq 13, -12 \leq l \leq 13$ |
| Reflections collected                      | 5465                                                        |
| Independent reflections                    | 2504 [ $R_{\text{int}} = 0.0412$ ]                          |
| Data/restraints/parameters                 | 3717 / 0 / 253                                              |
| Goodness-of-fit on $F^2$                   | 0.993                                                       |
| Final R indexes [ $I \geq 2\sigma(I)$ ]    | $R_1 = 0.0412, wR_2 = 0.0896$                               |
| R indices (all data)                       | $R_1 = 0.0738, wR_2 = 0.0989$                               |
| Largest diff. peak and hole/ 1-sigma level | 0.255 / - 0.481 / 0.044                                     |

## 6. NMR spectra

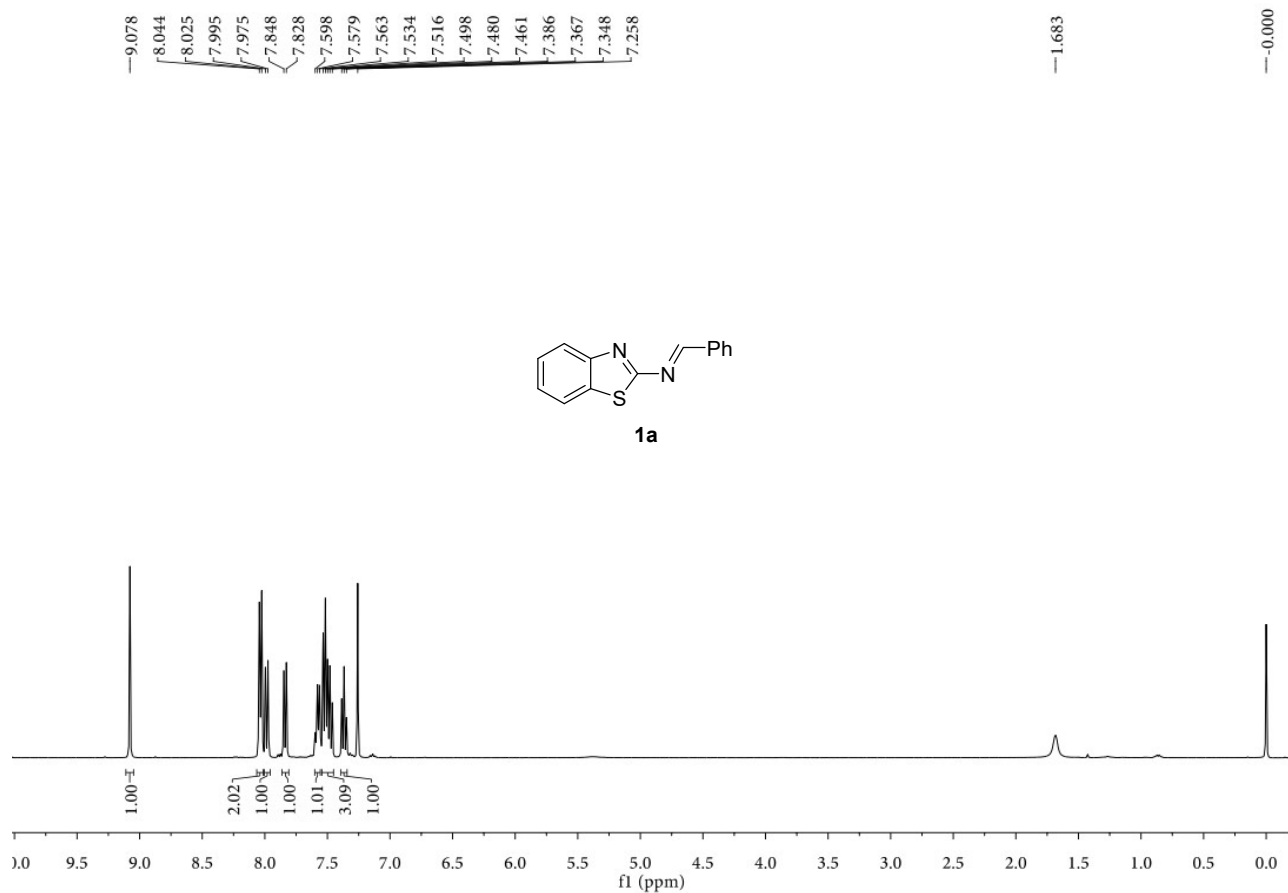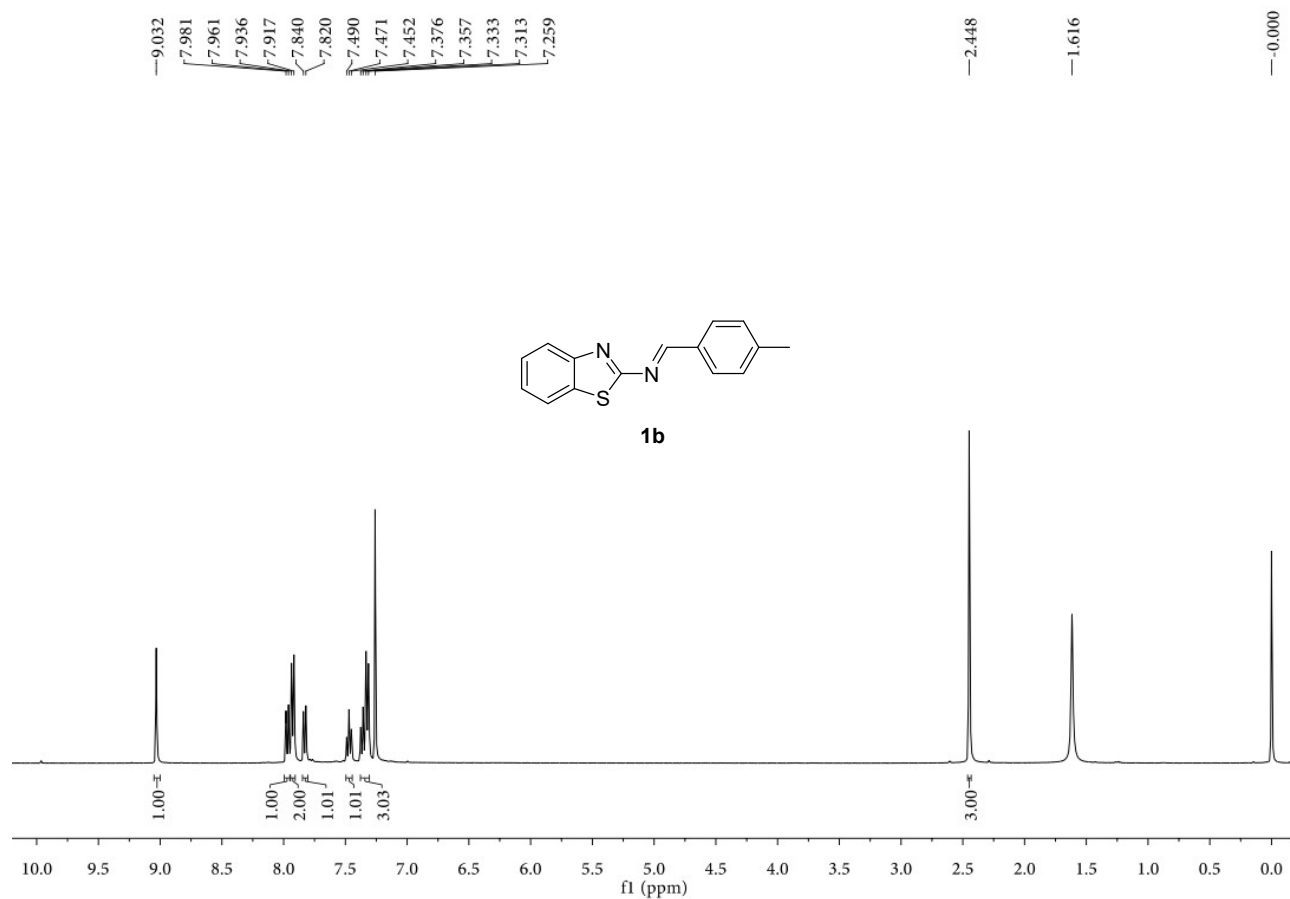

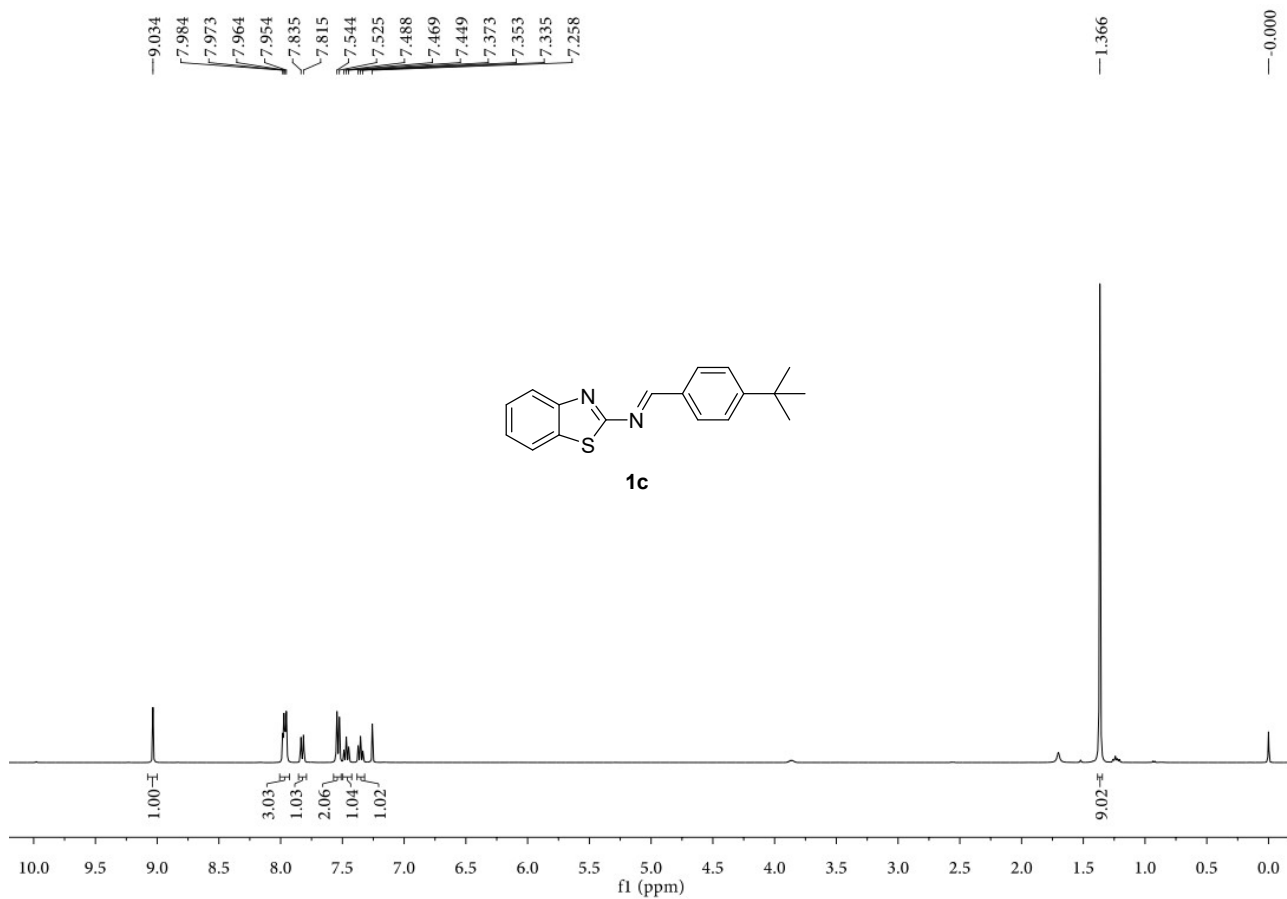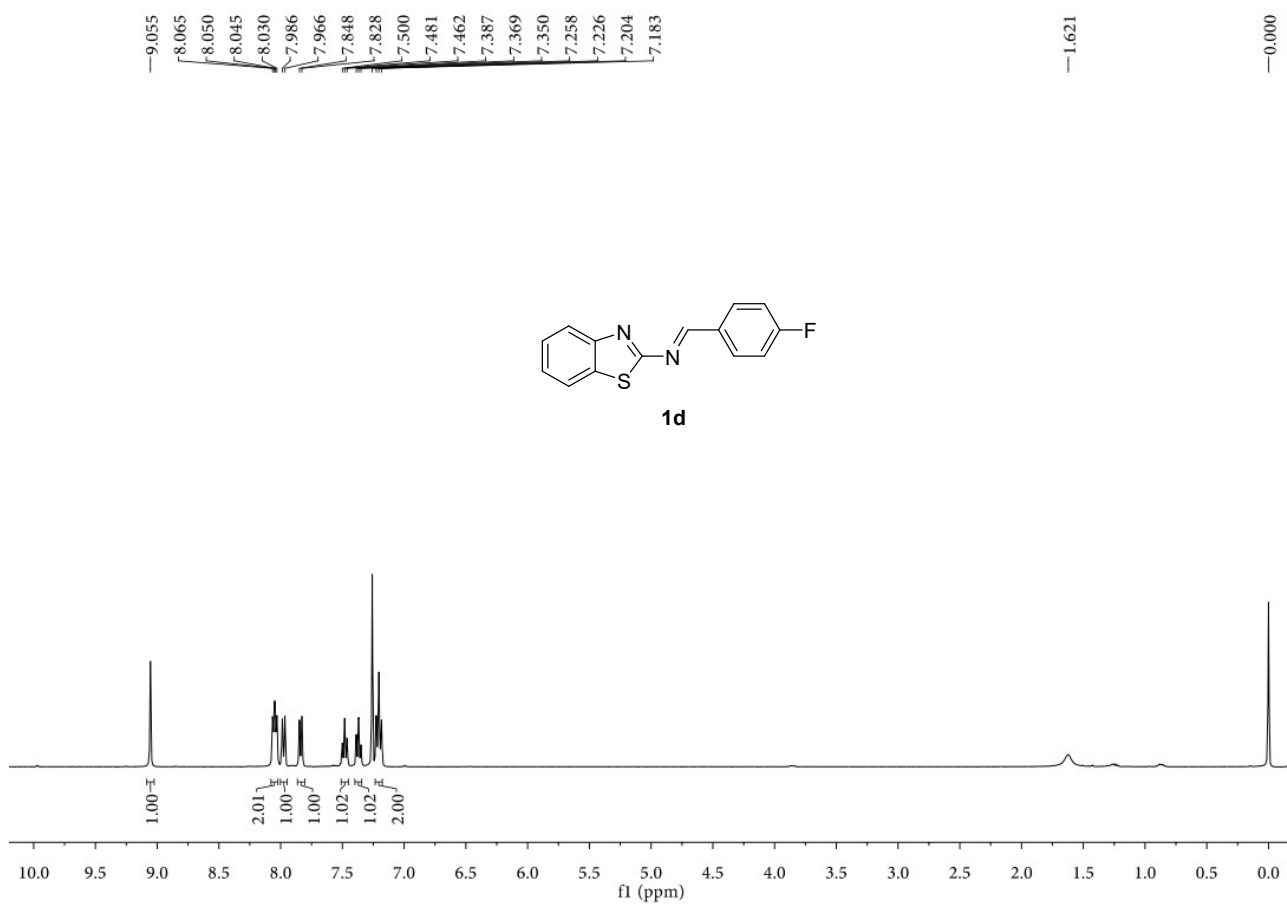

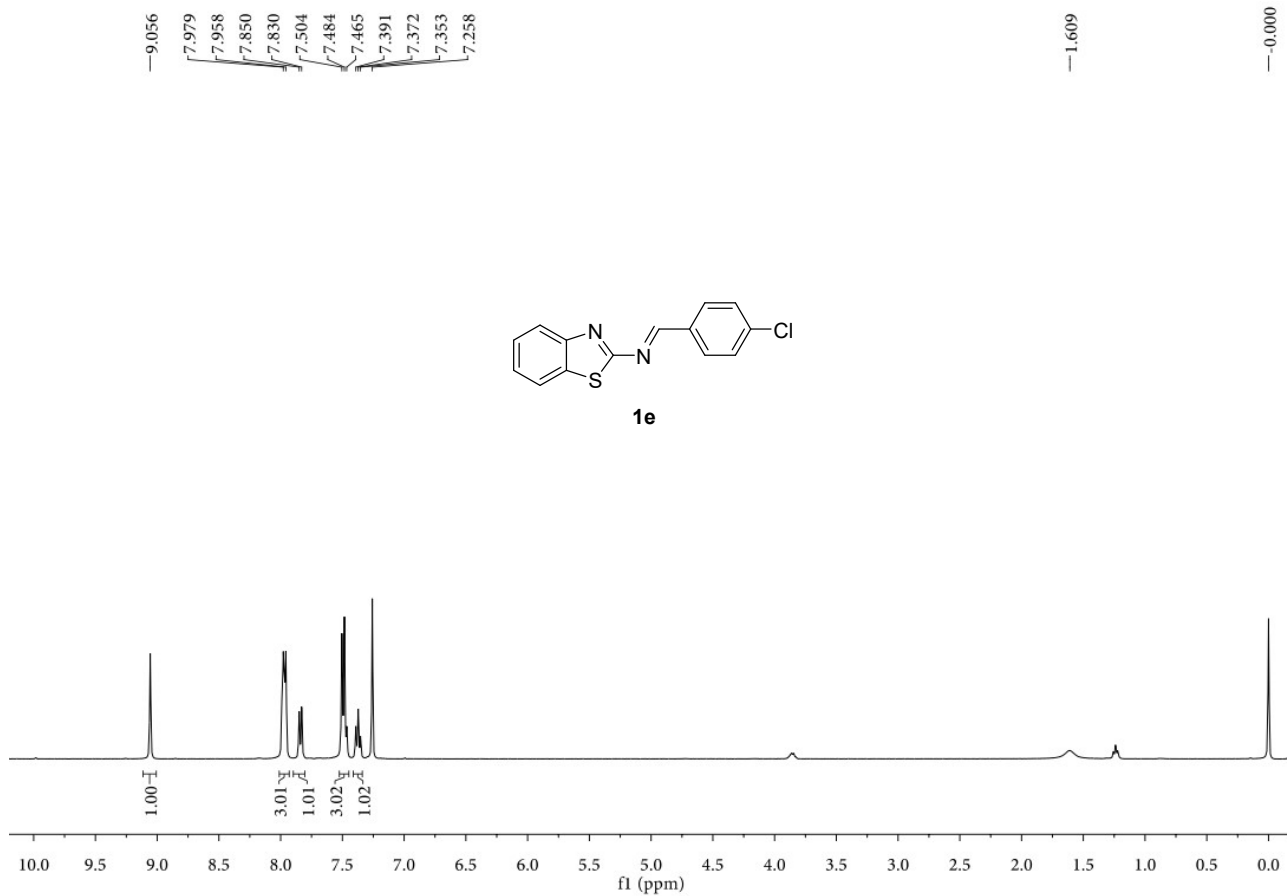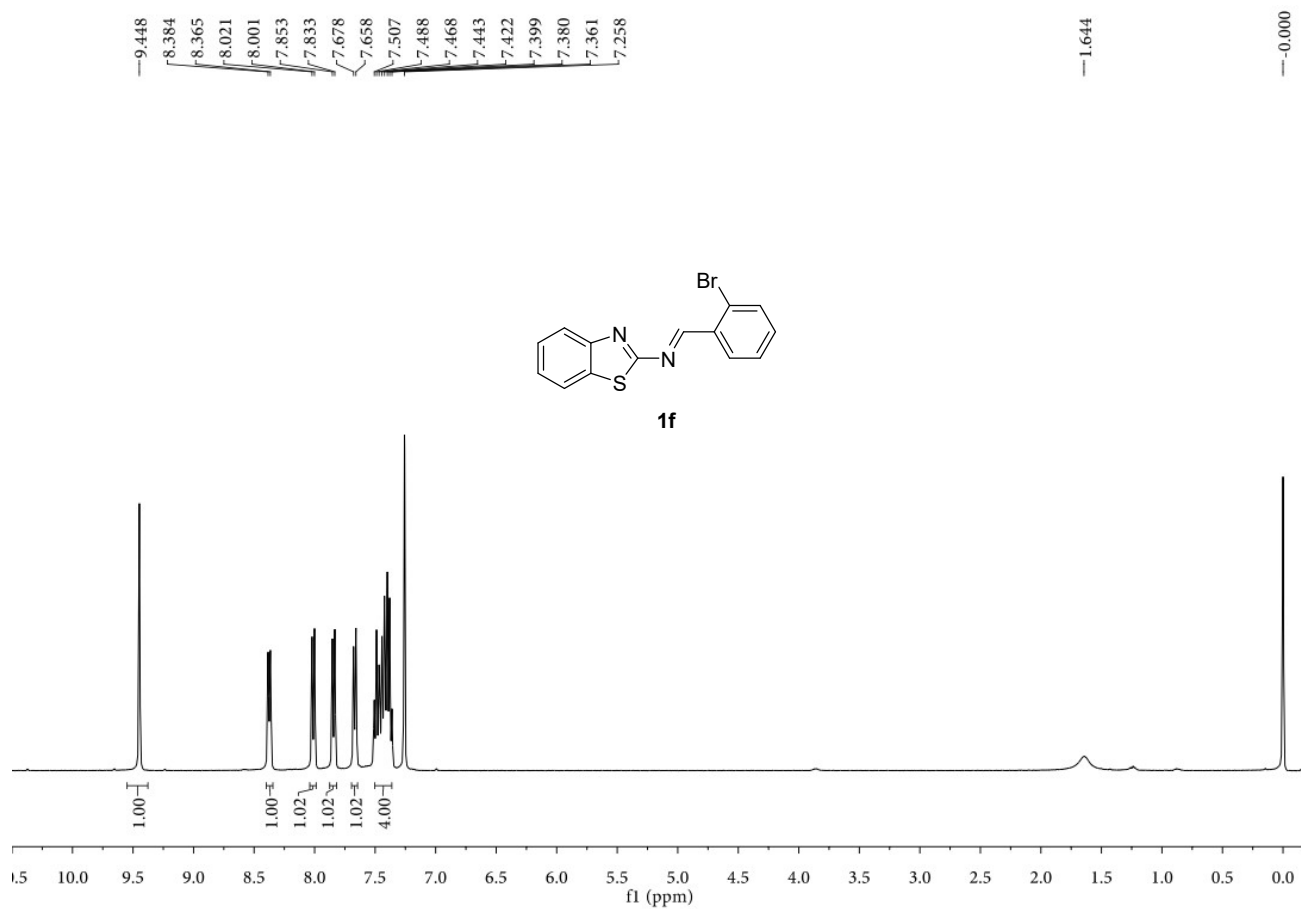

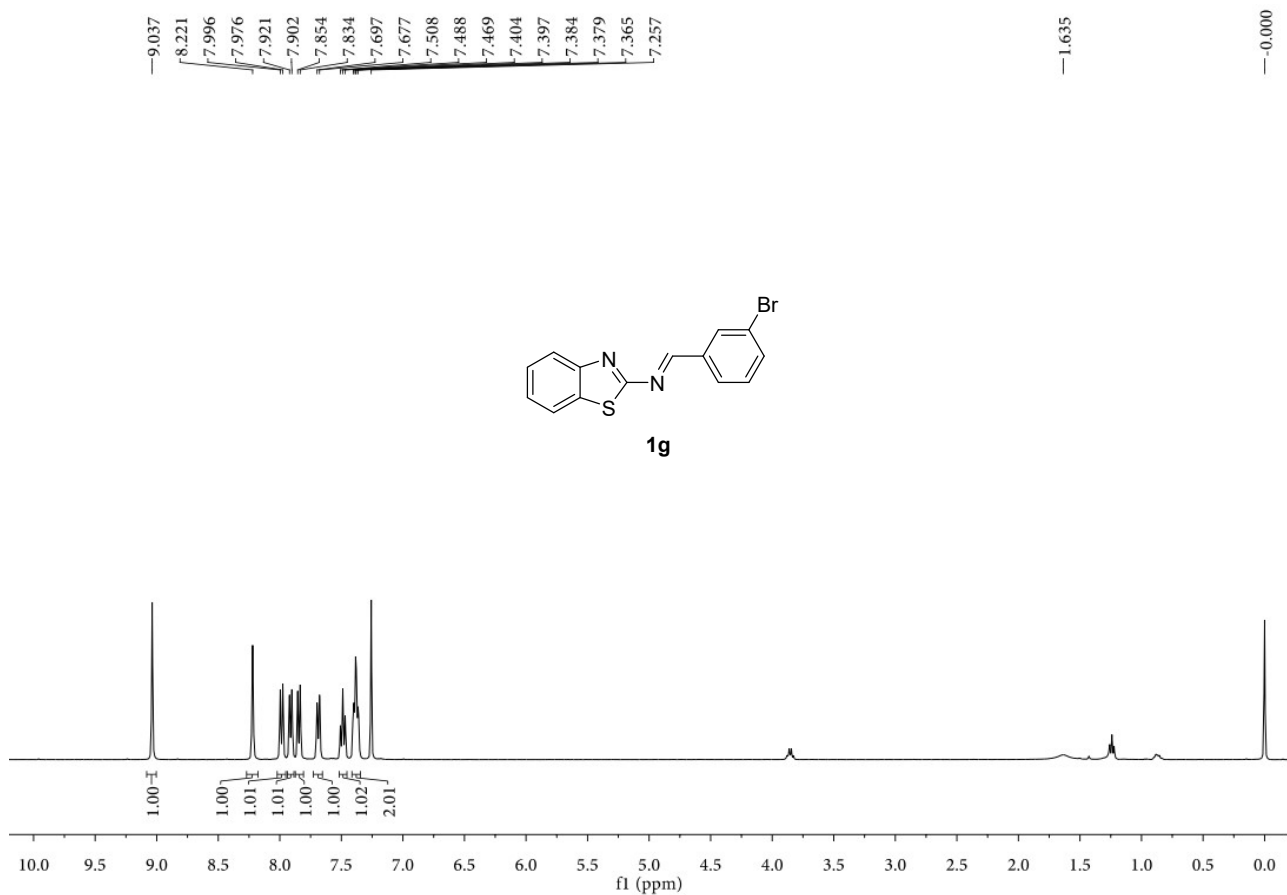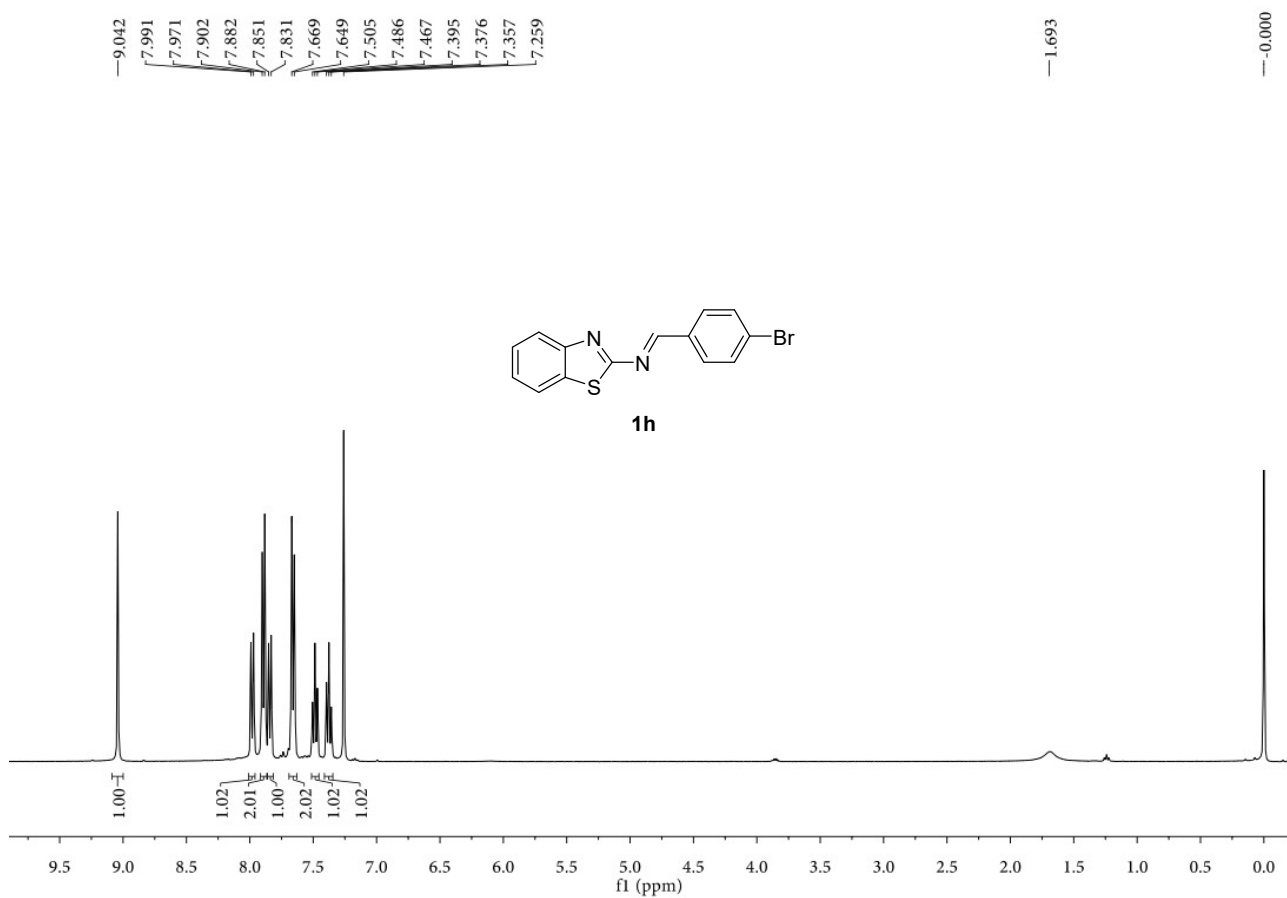

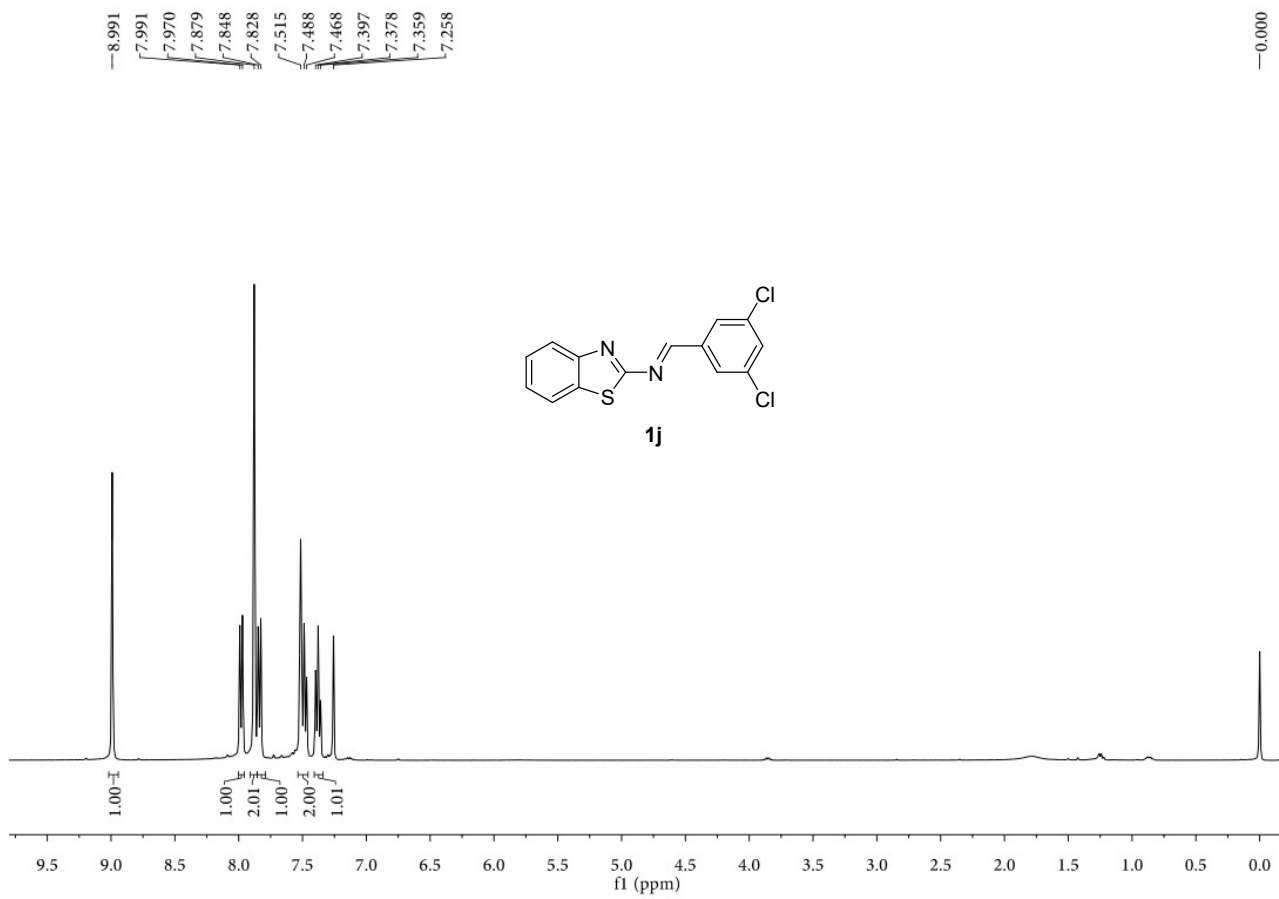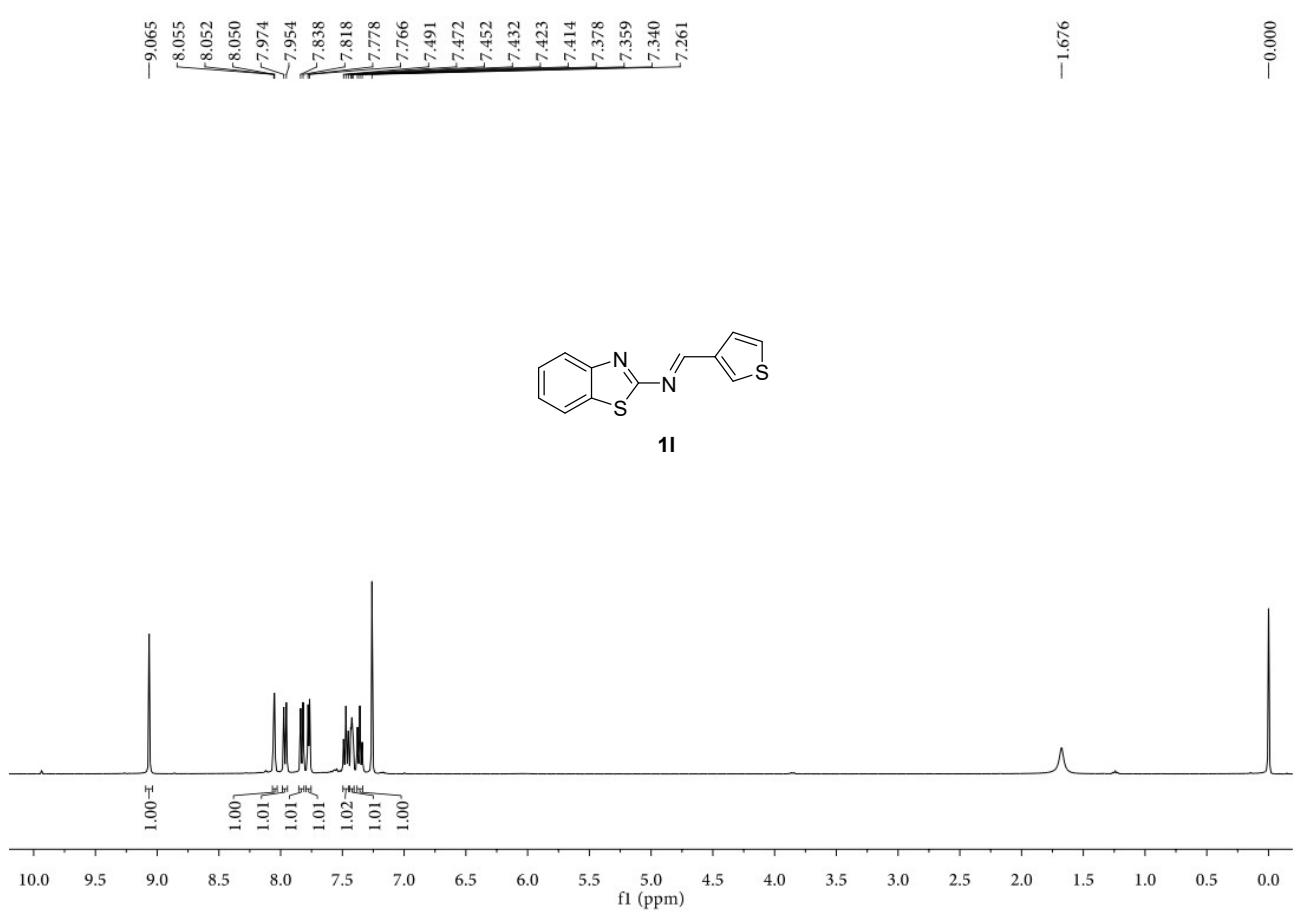

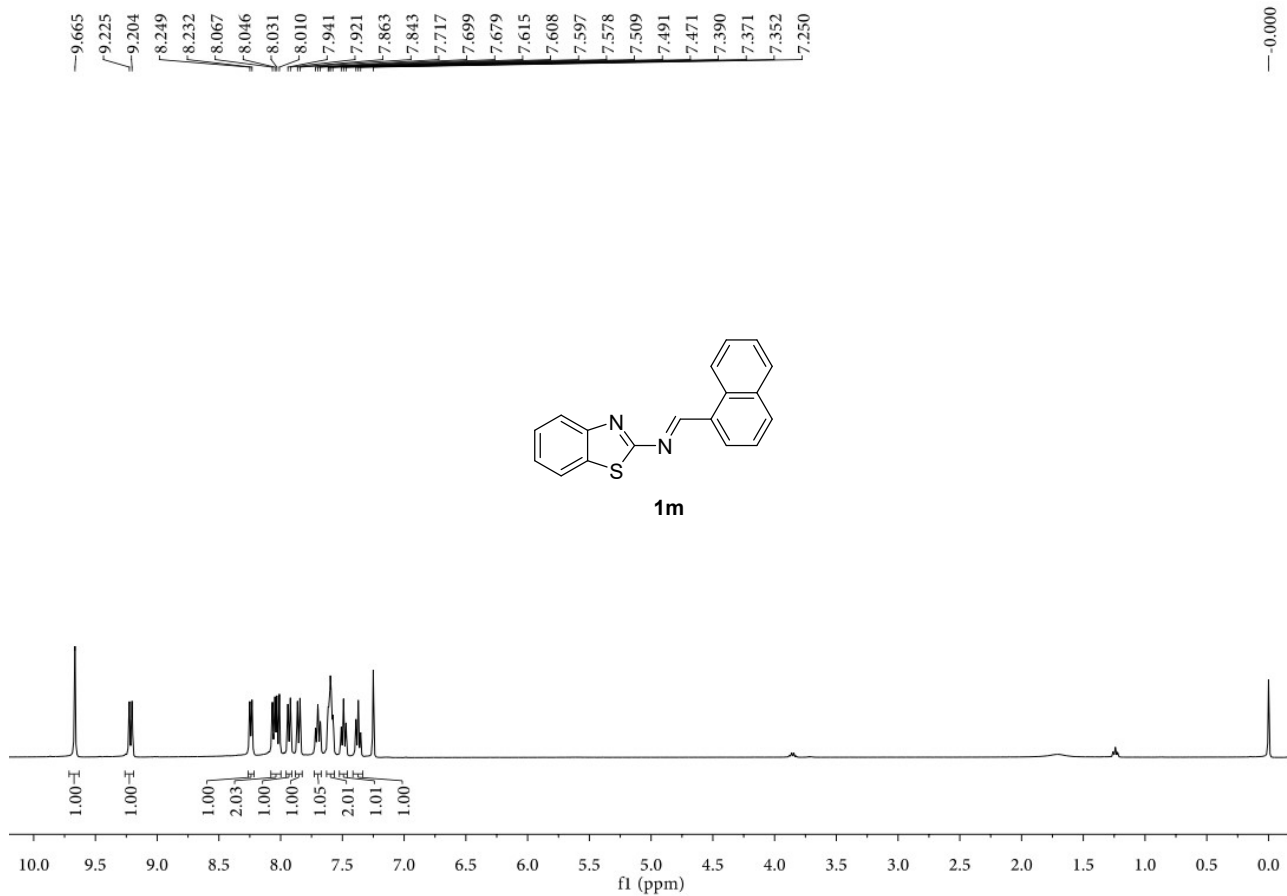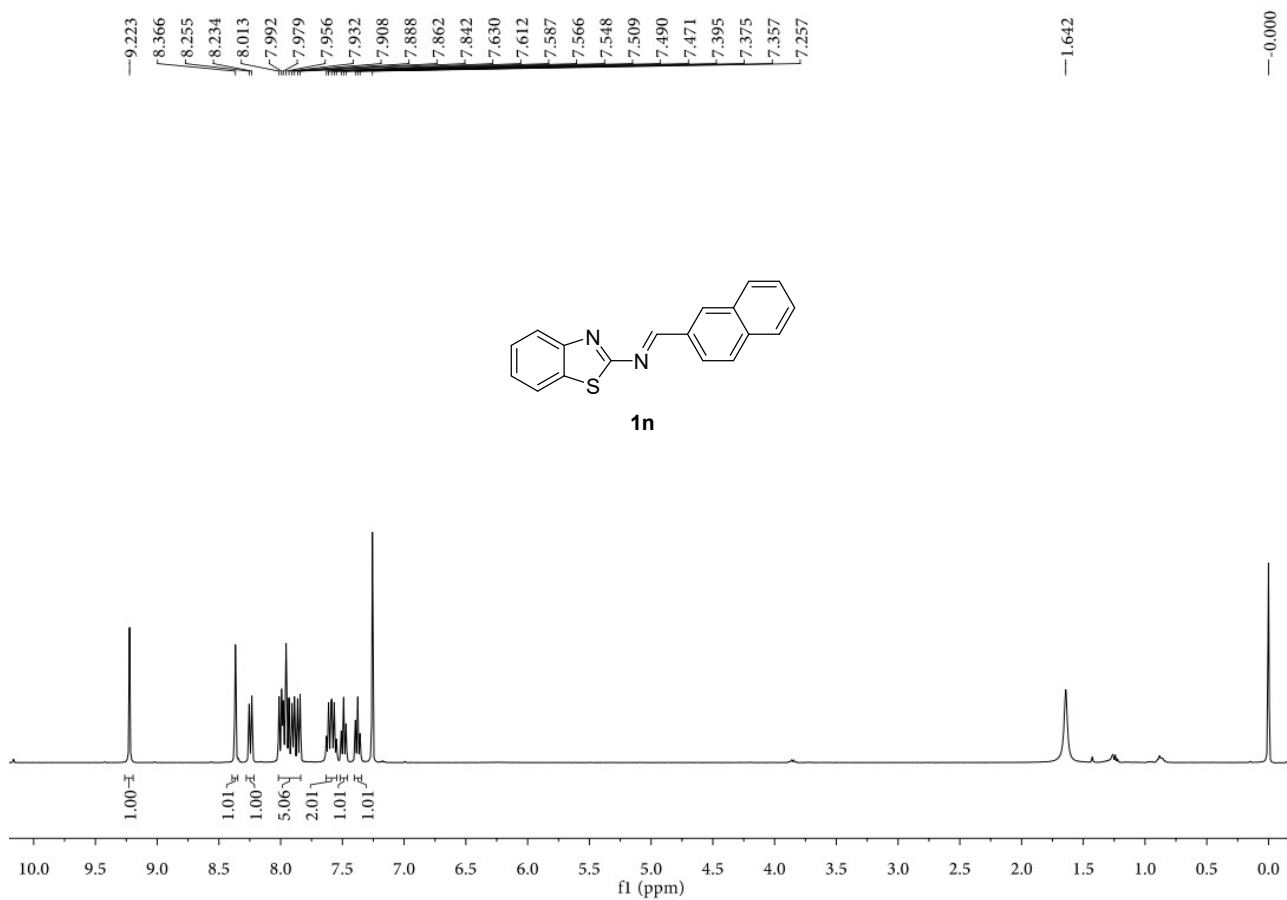



9.042  
8.025  
8.006  
7.881  
7.859  
7.797  
7.601  
7.583  
7.565  
7.529  
7.510  
7.492  
7.436  
7.415  
7.260

0.000

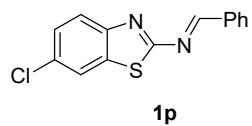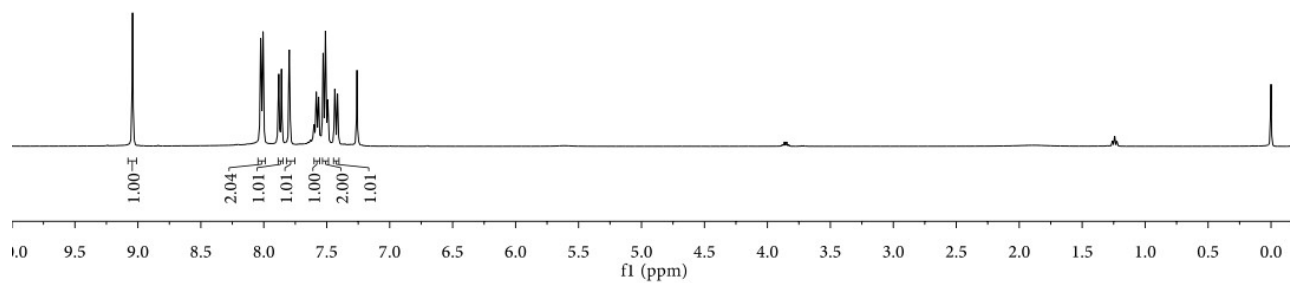

9.372  
8.074  
8.054  
7.848  
7.645  
7.627  
7.609  
7.557  
7.539  
7.520  
7.463  
7.442  
7.414  
7.393  
7.261

1.665

0.000

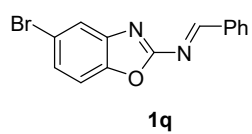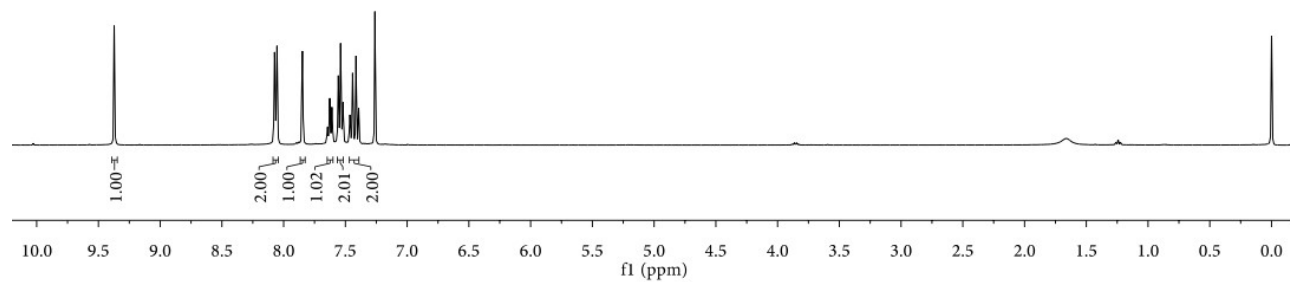

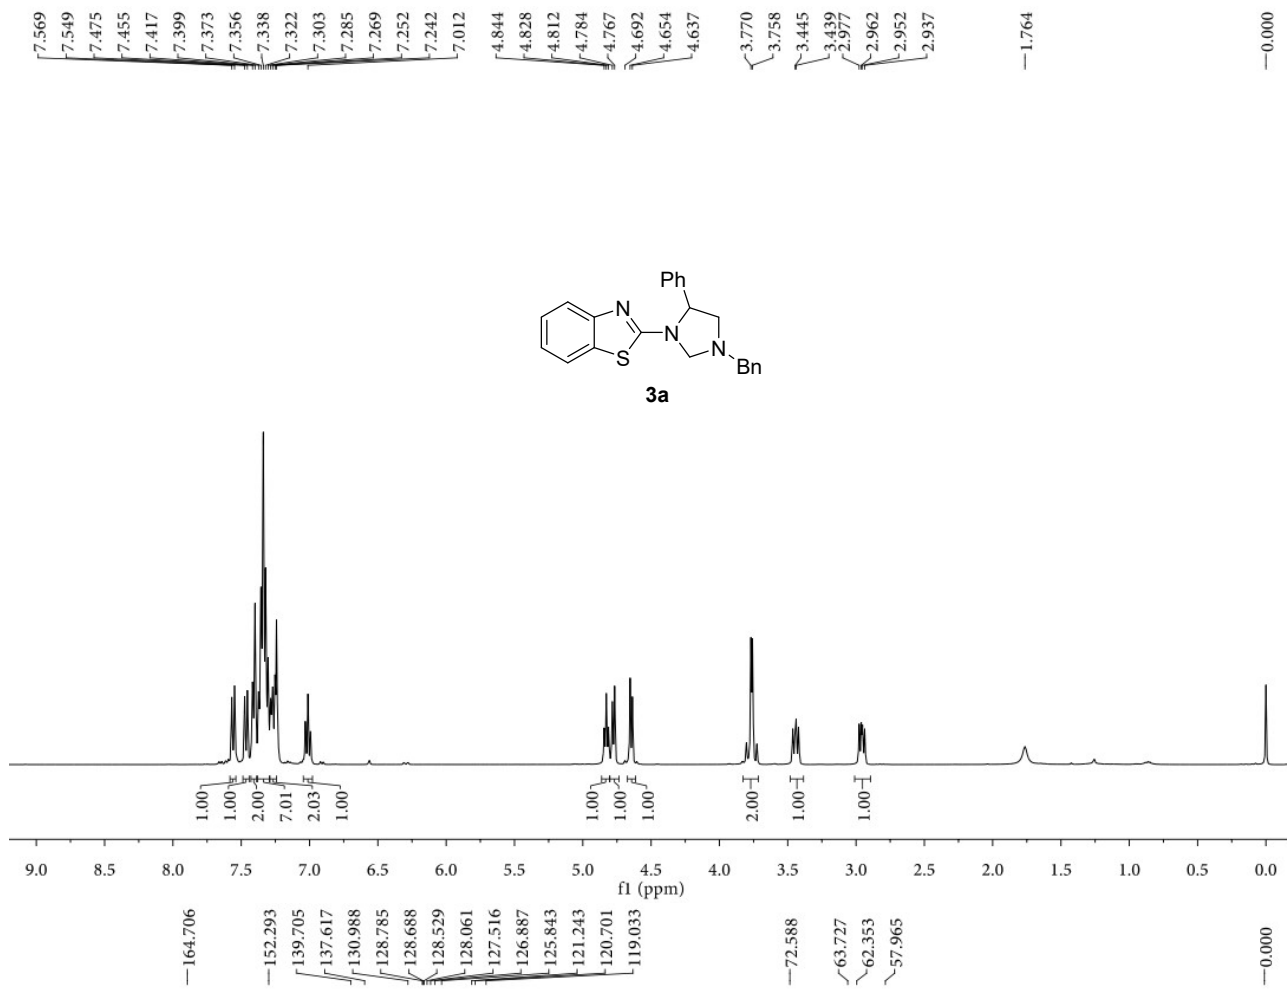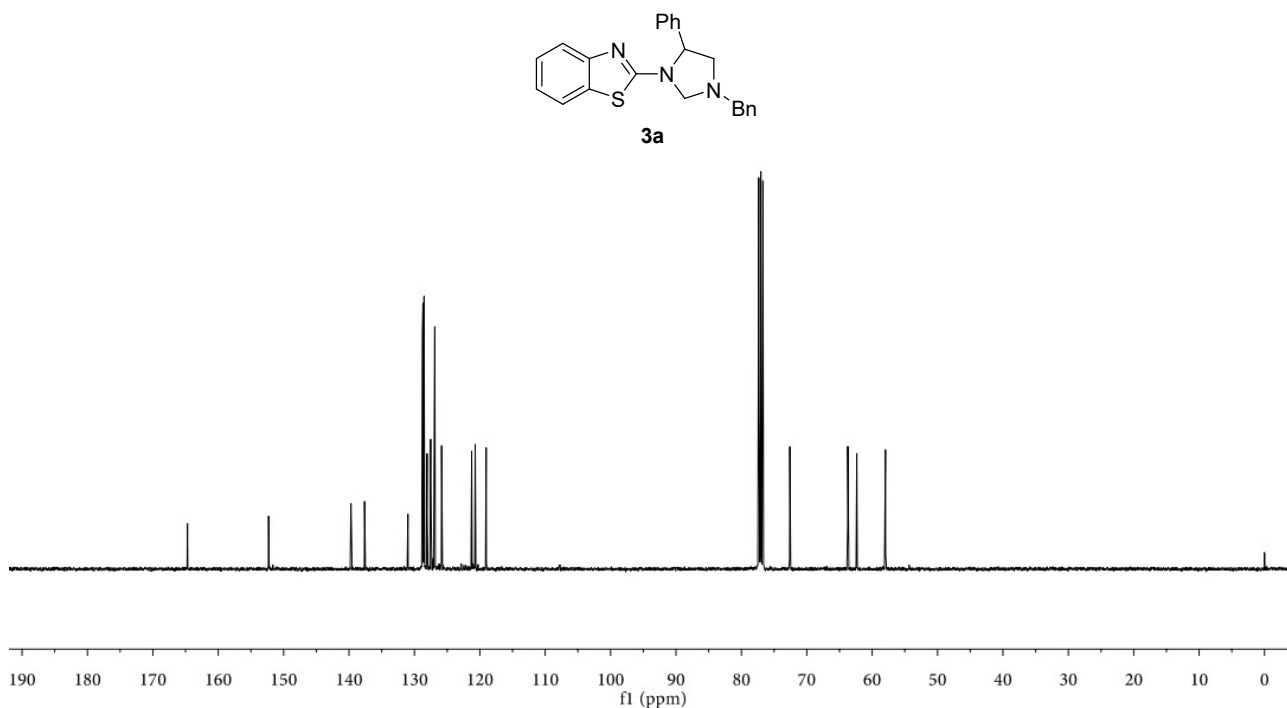

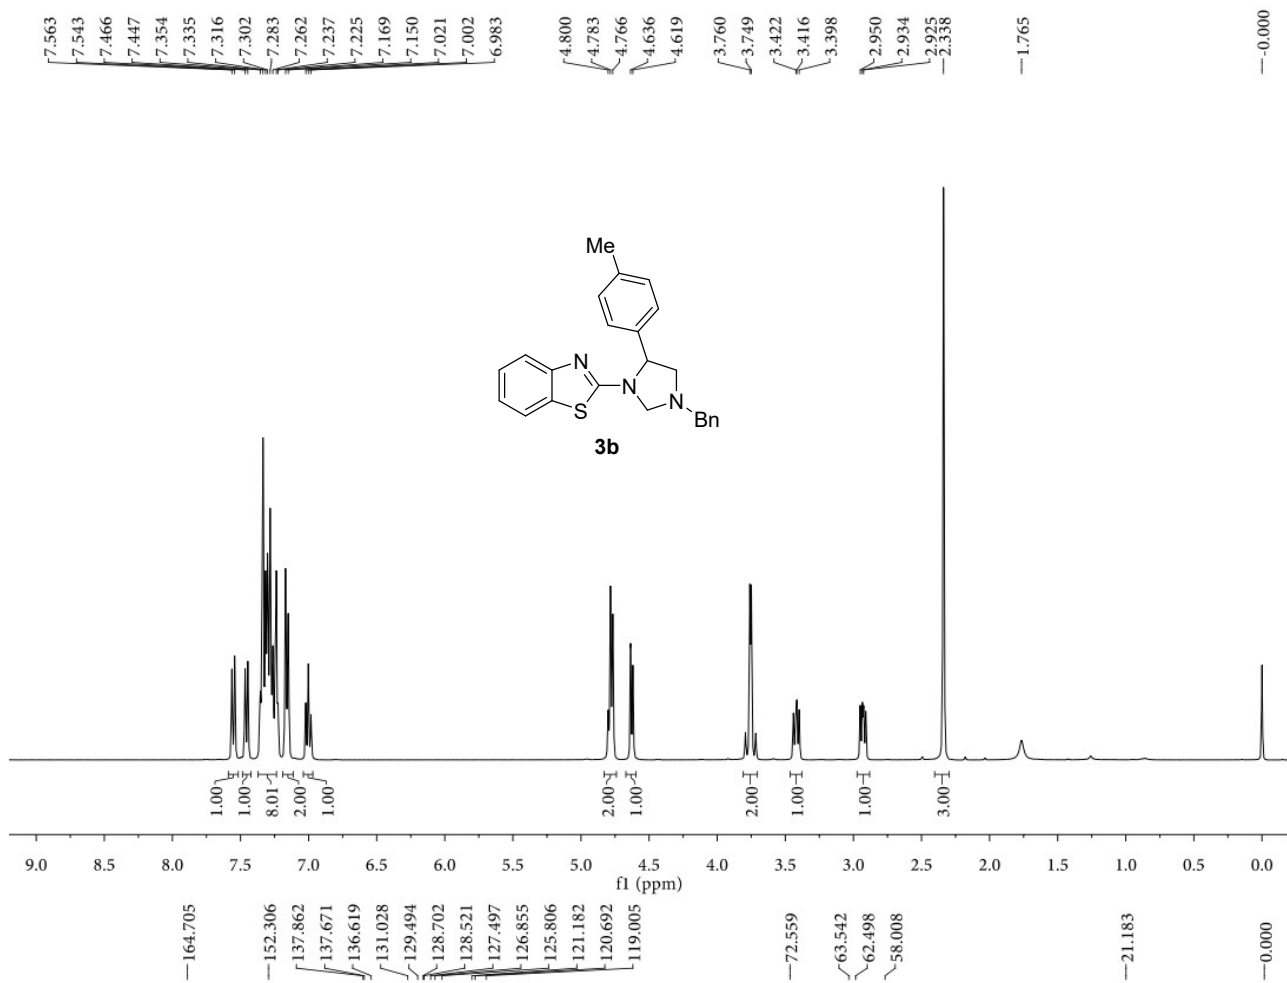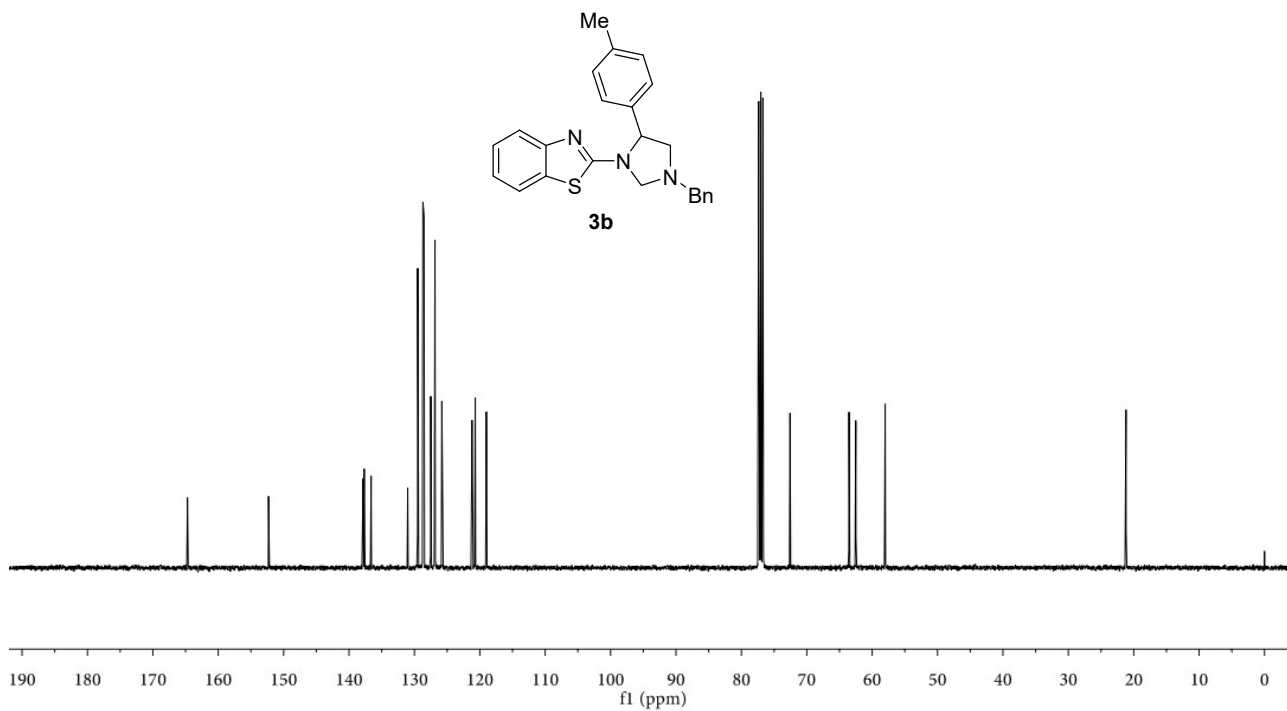

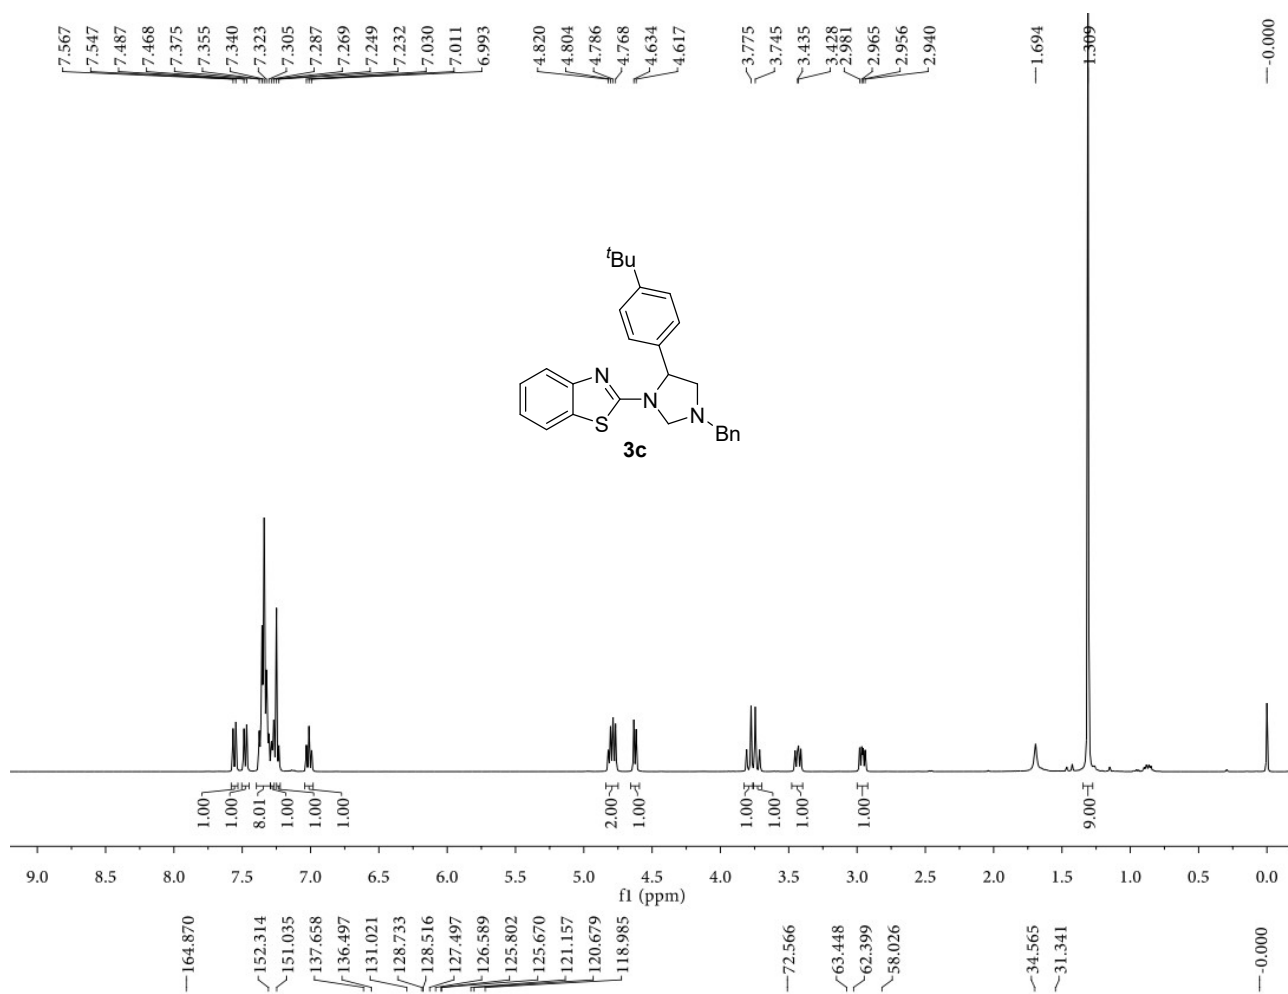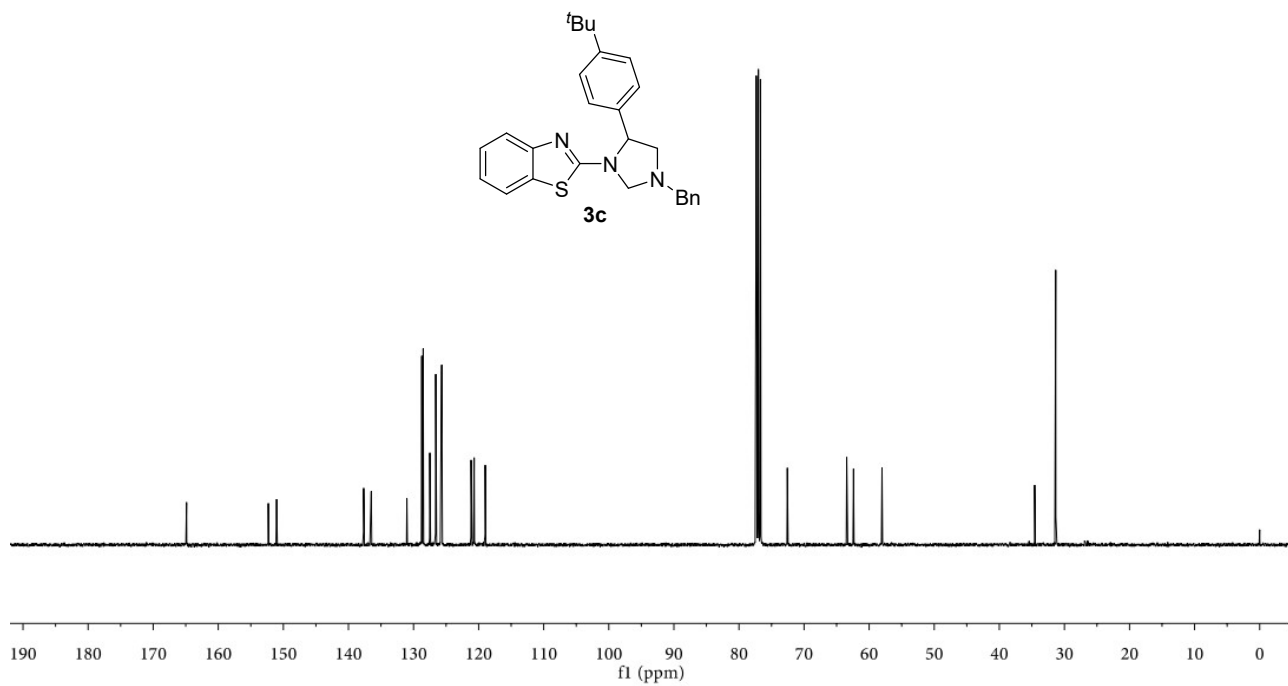

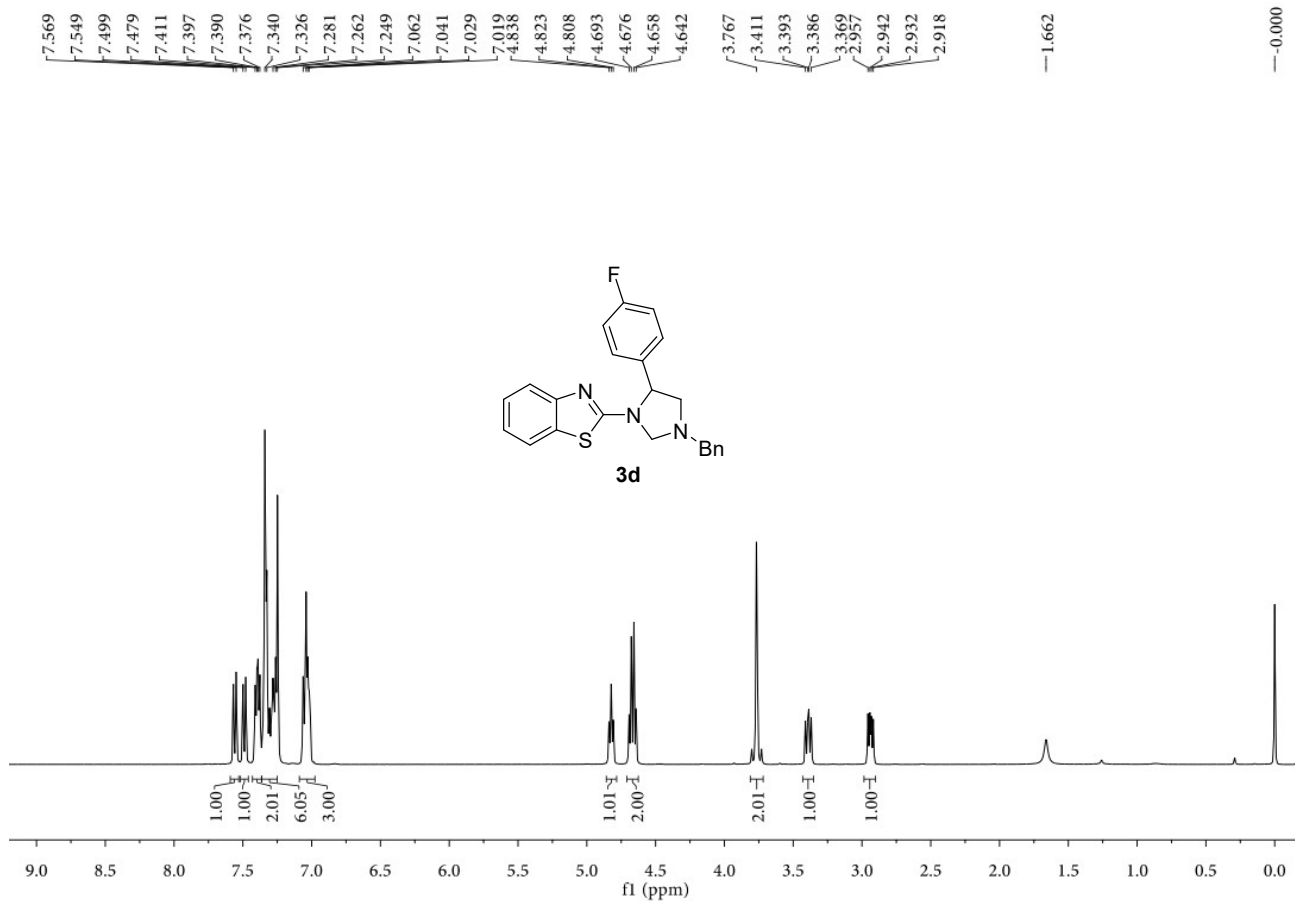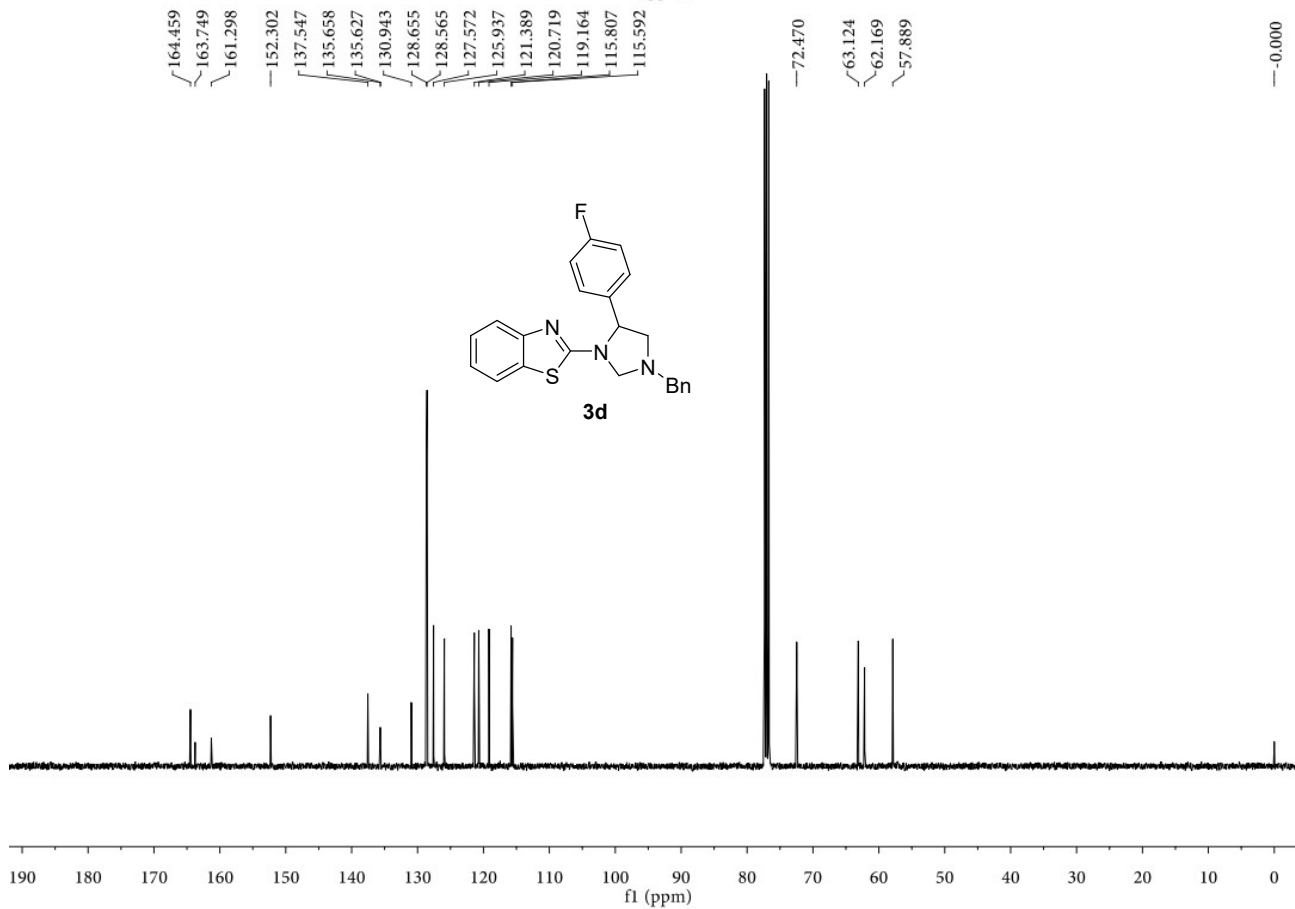

114.088

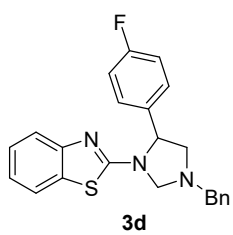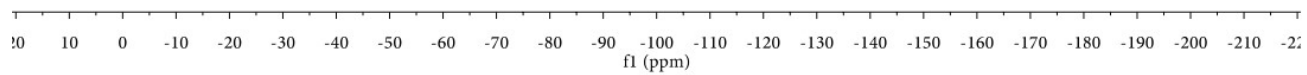

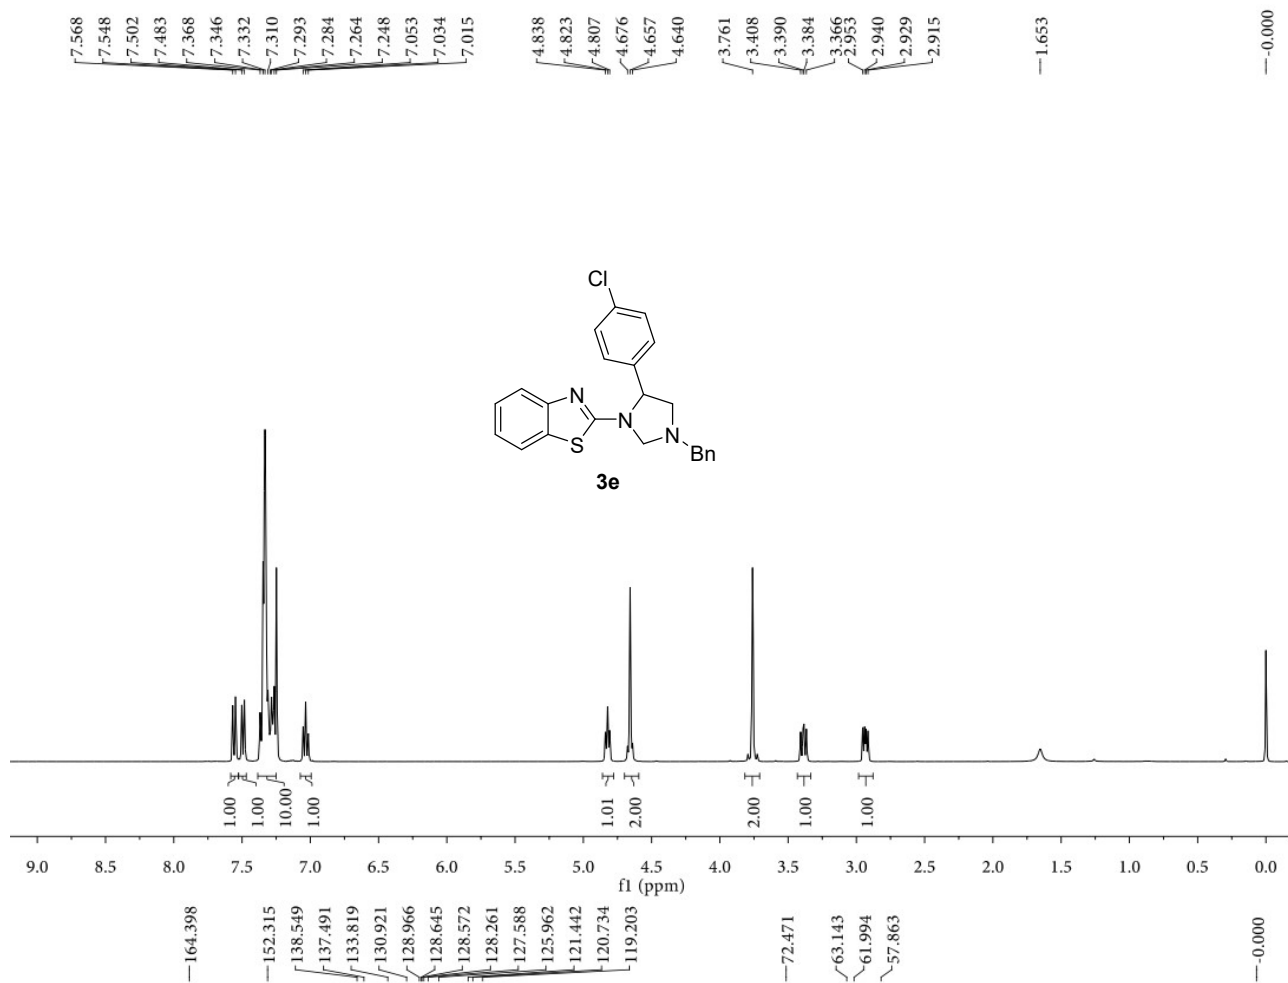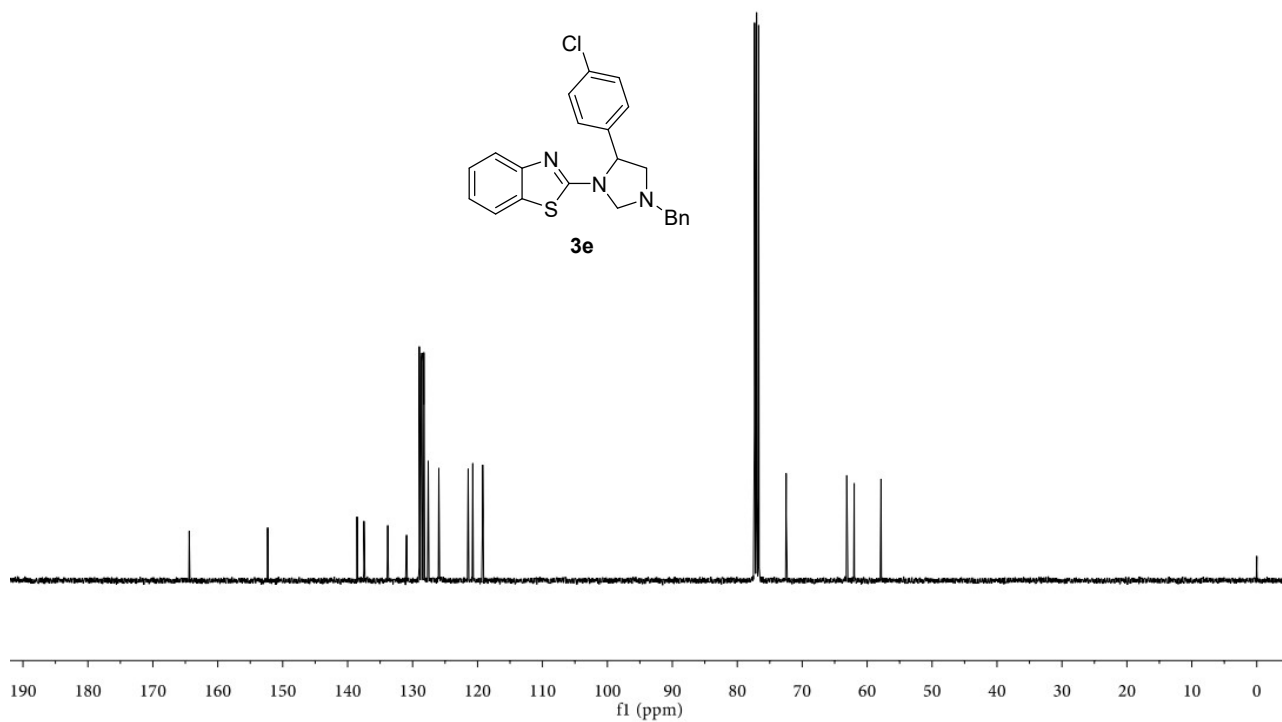

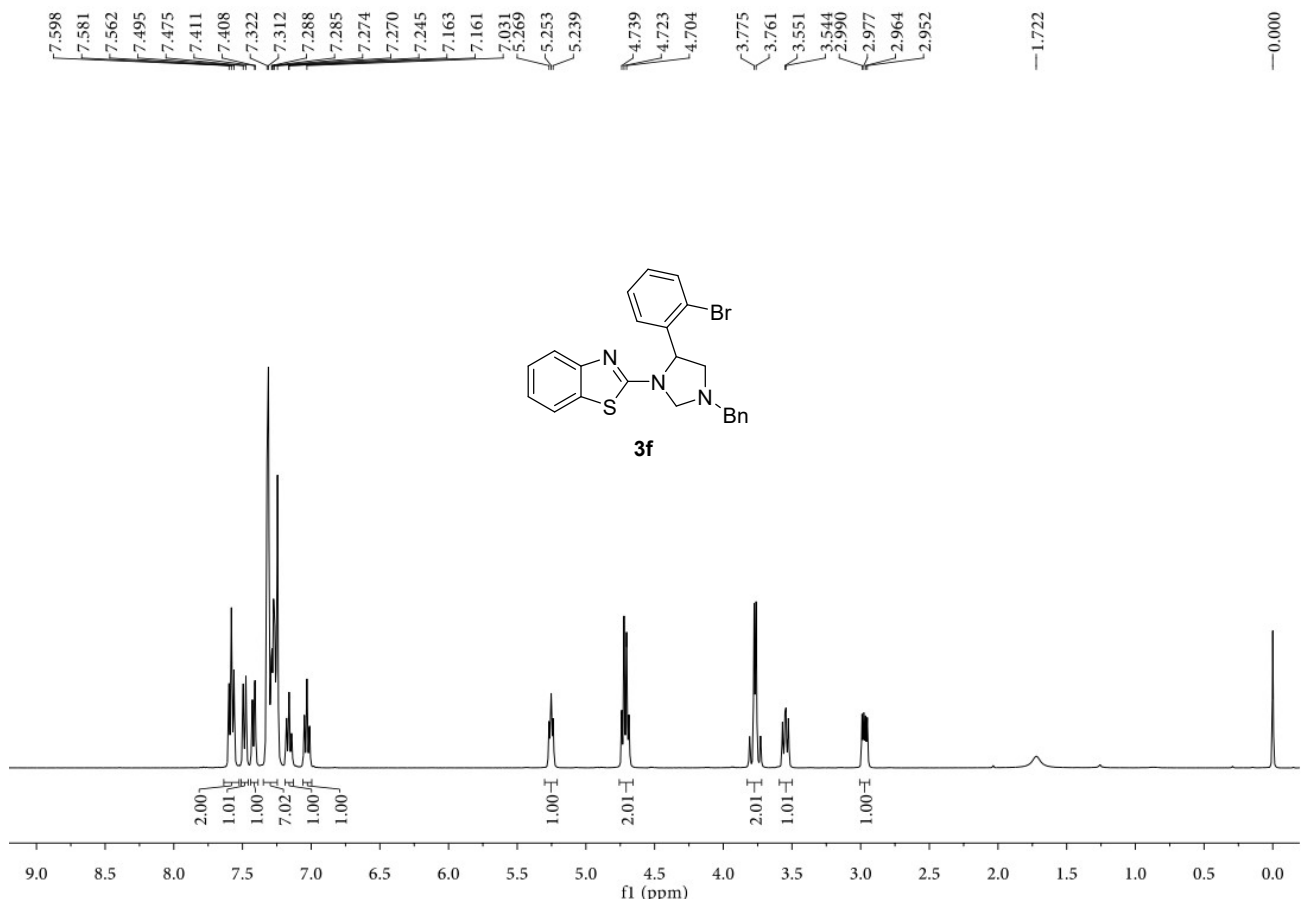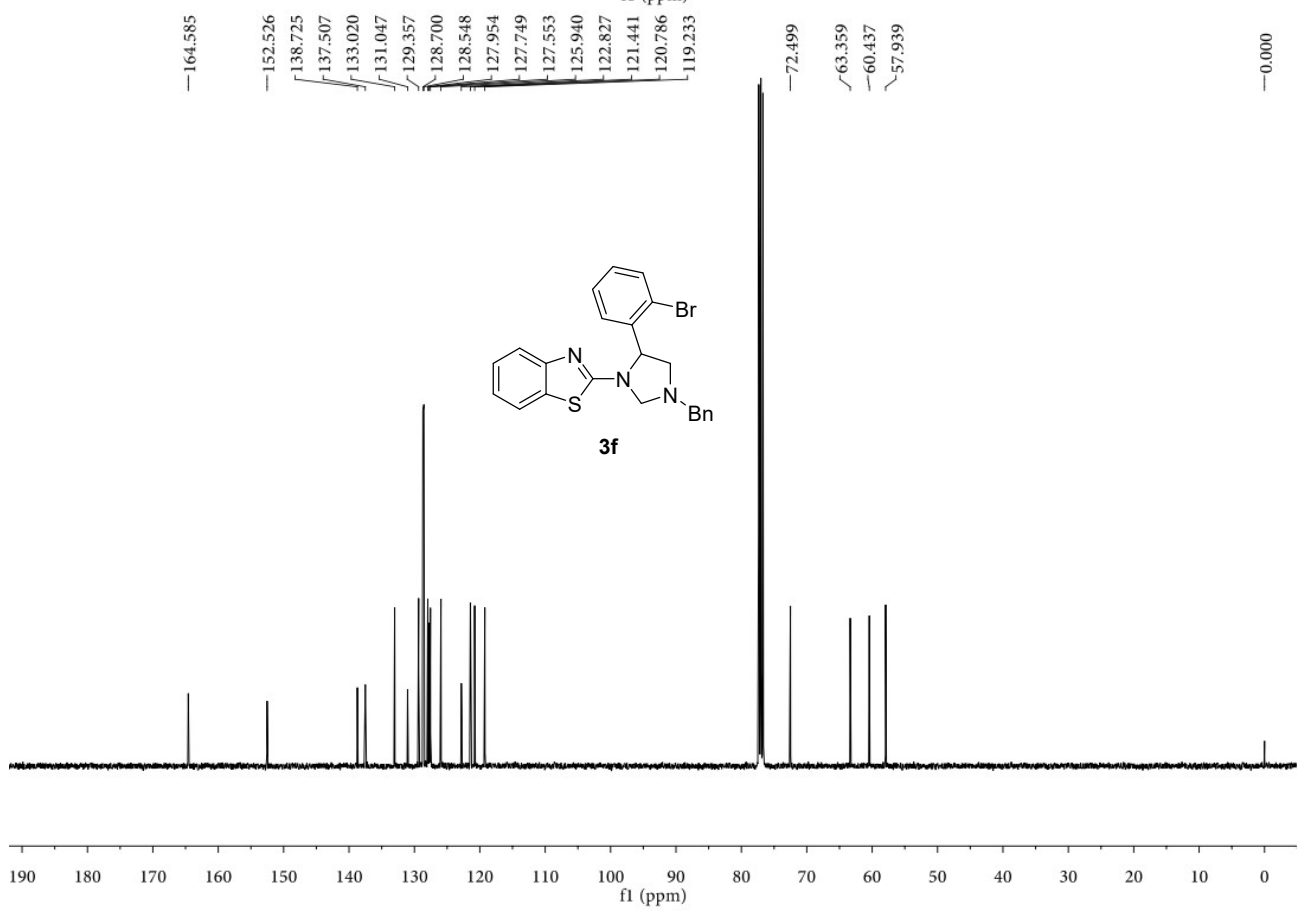



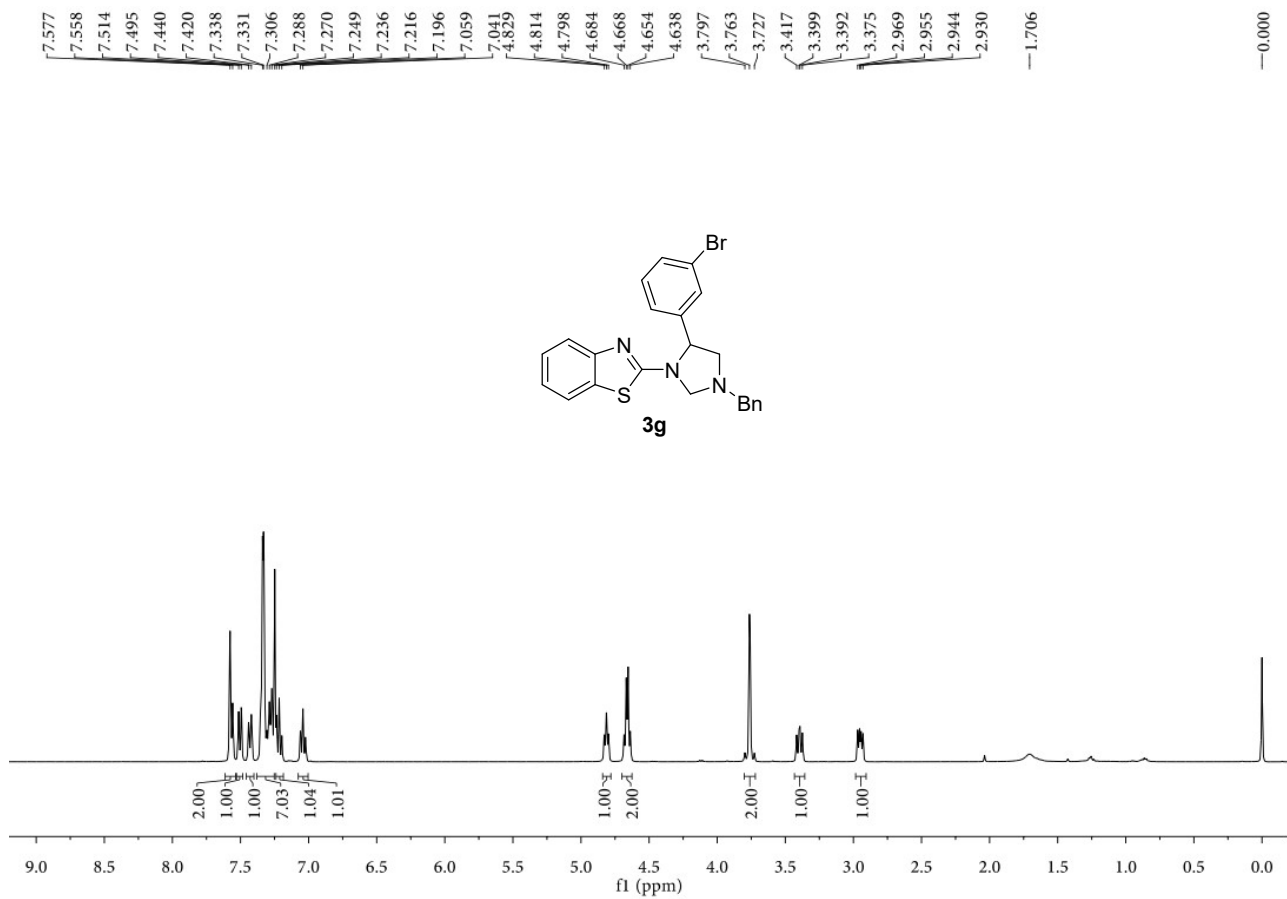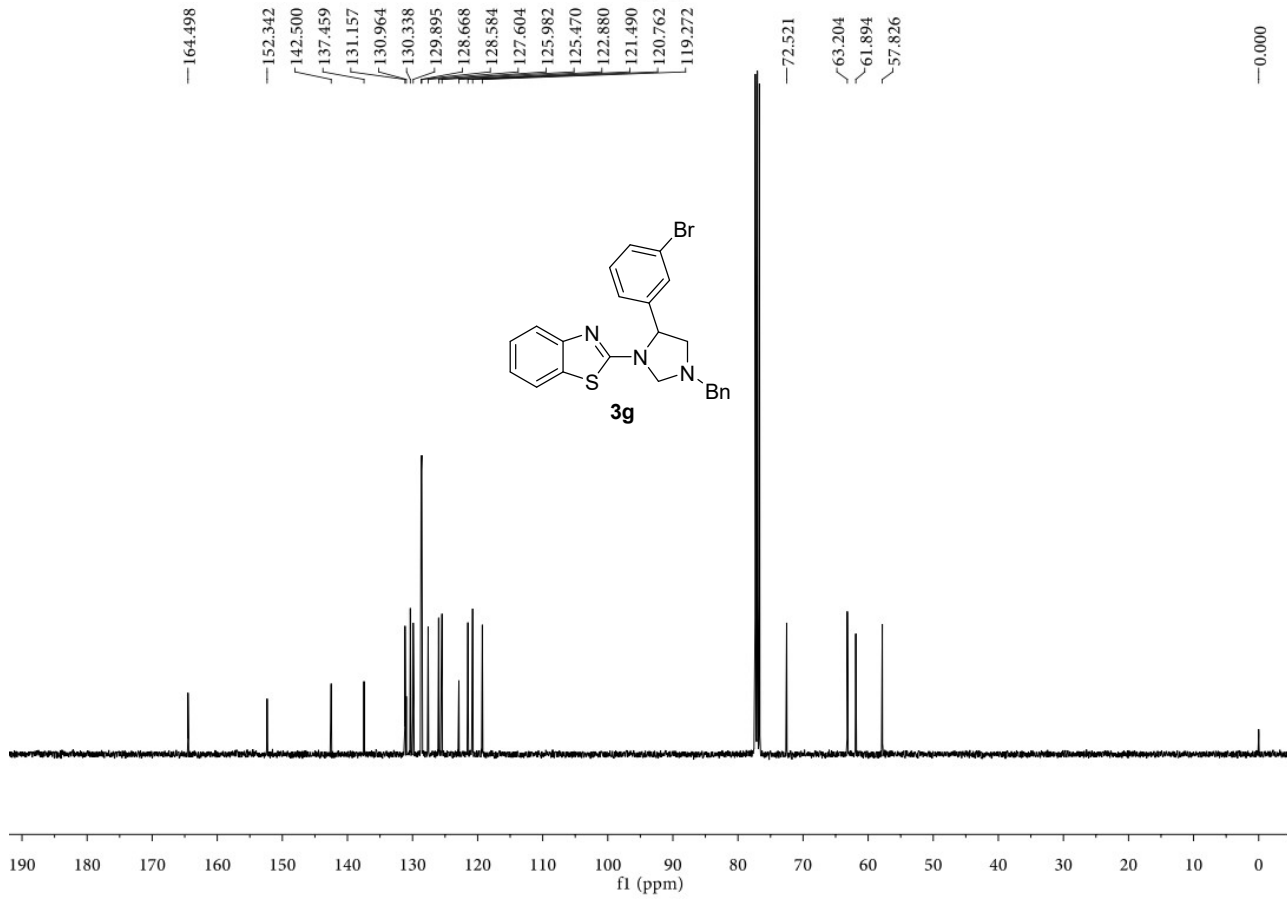

—0.000

7.567  
7.547  
7.489  
7.471  
7.453  
7.323  
7.314  
7.285  
7.266  
7.228  
7.040  
7.021  
7.002  
4.801  
4.786  
4.772  
4.639  
3.770  
3.736  
3.703  
3.375  
3.353  
3.334  
2.930  
2.917  
2.906  
2.892

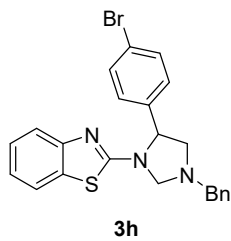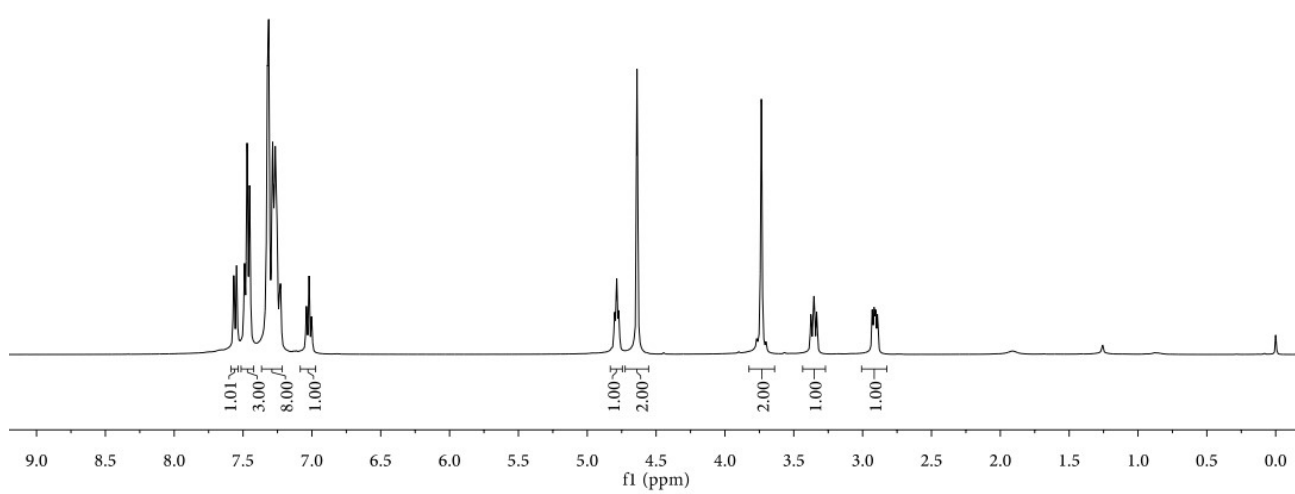

164.403  
152.379  
139.162  
137.531  
131.940  
130.968  
128.677  
128.634  
128.613  
127.625  
126.012  
121.948  
121.494  
120.785  
119.262  
72.499  
63.225  
61.939  
57.876

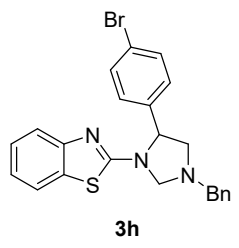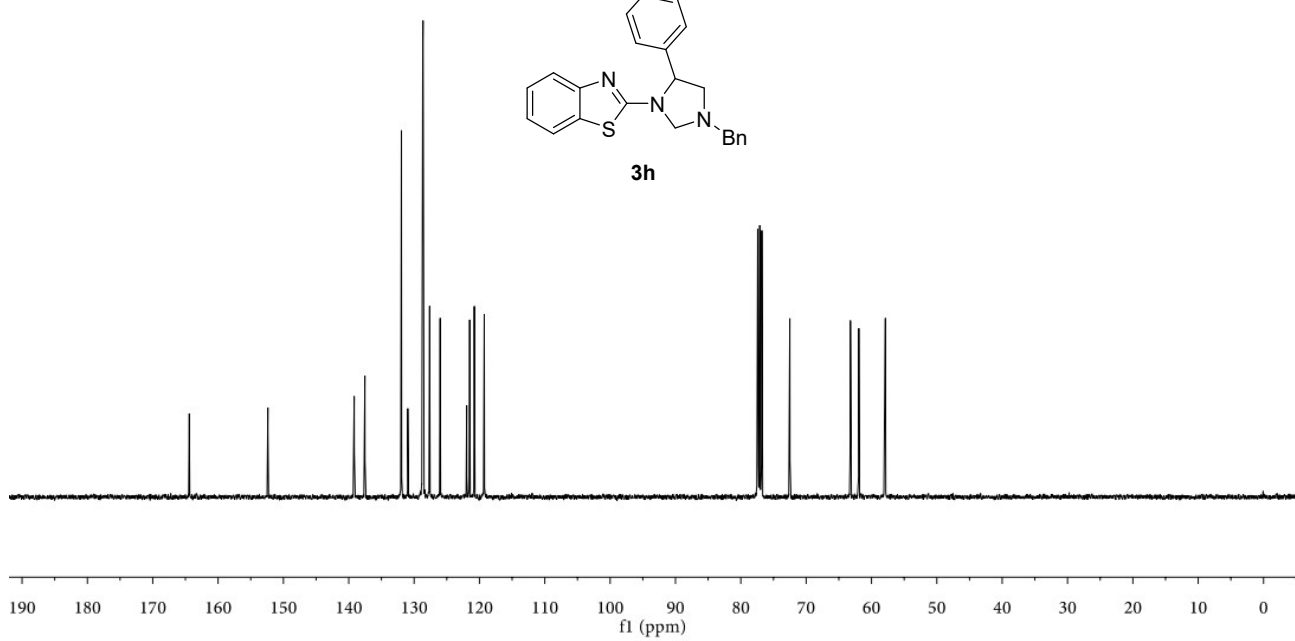

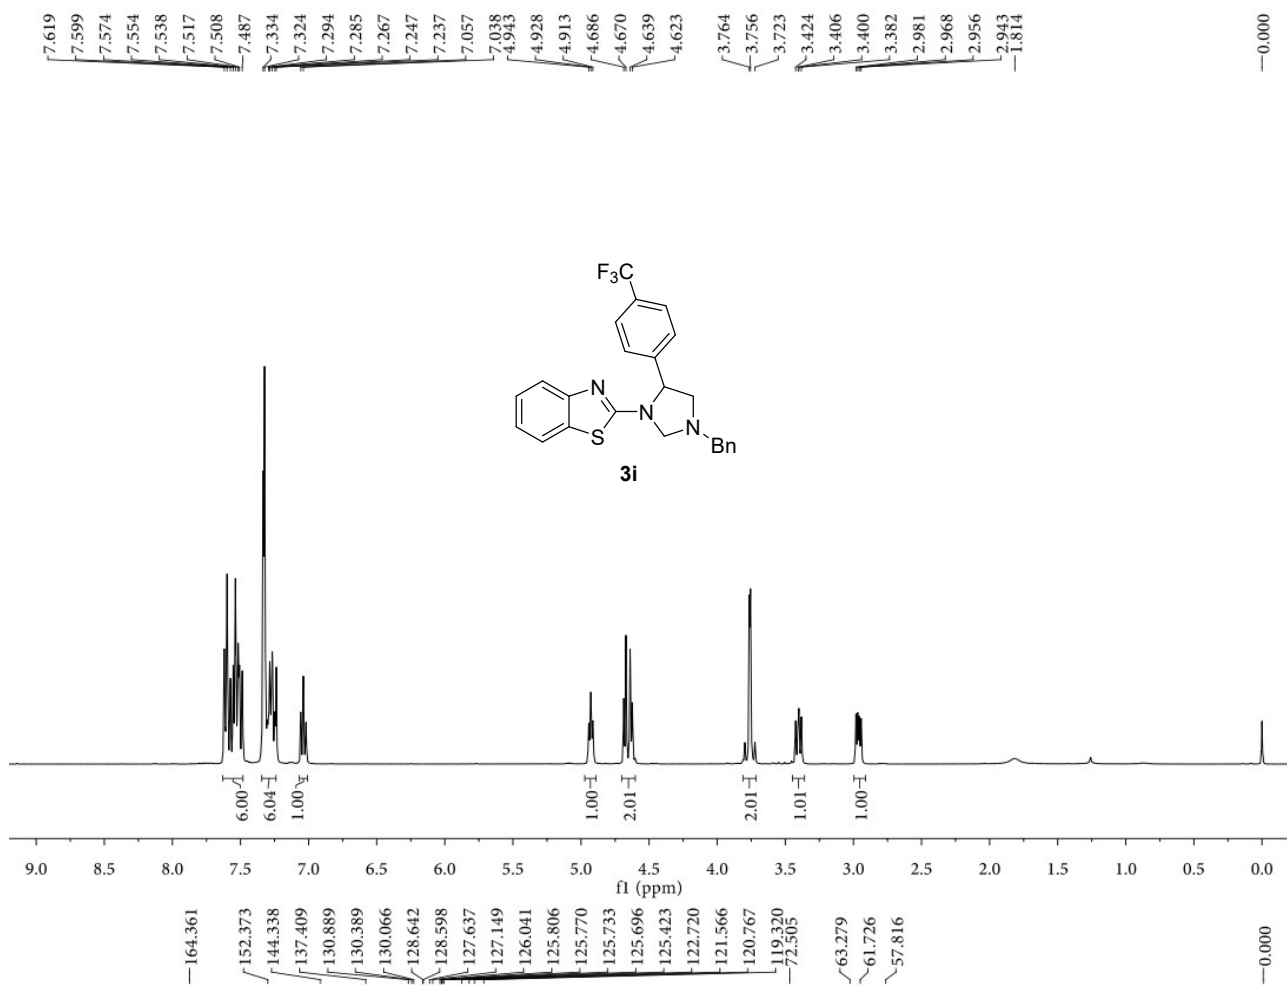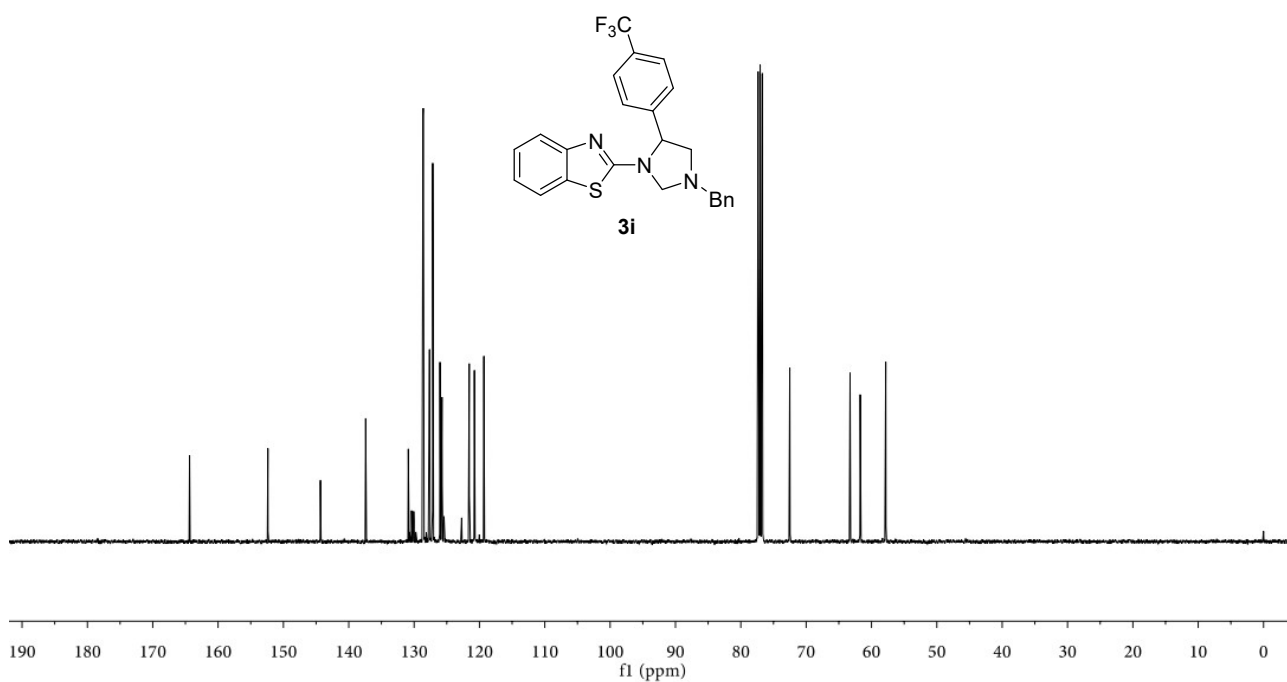

—62.459

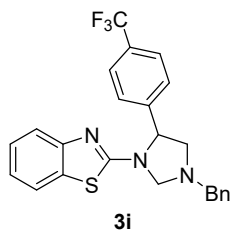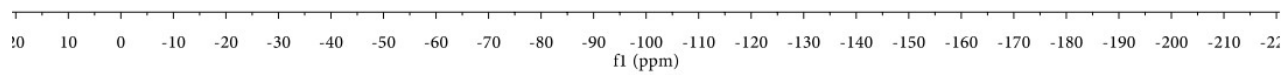

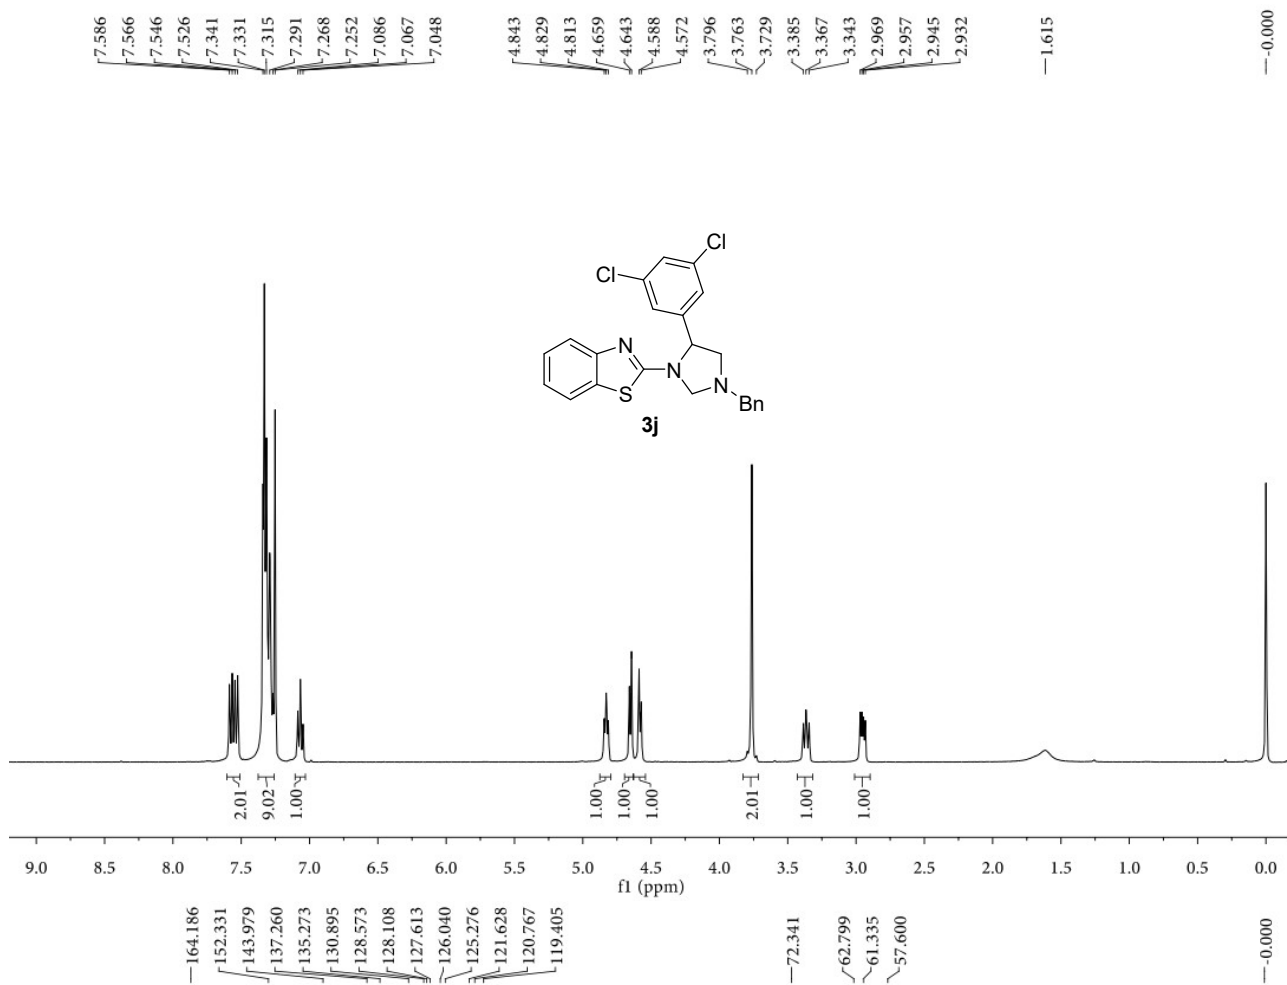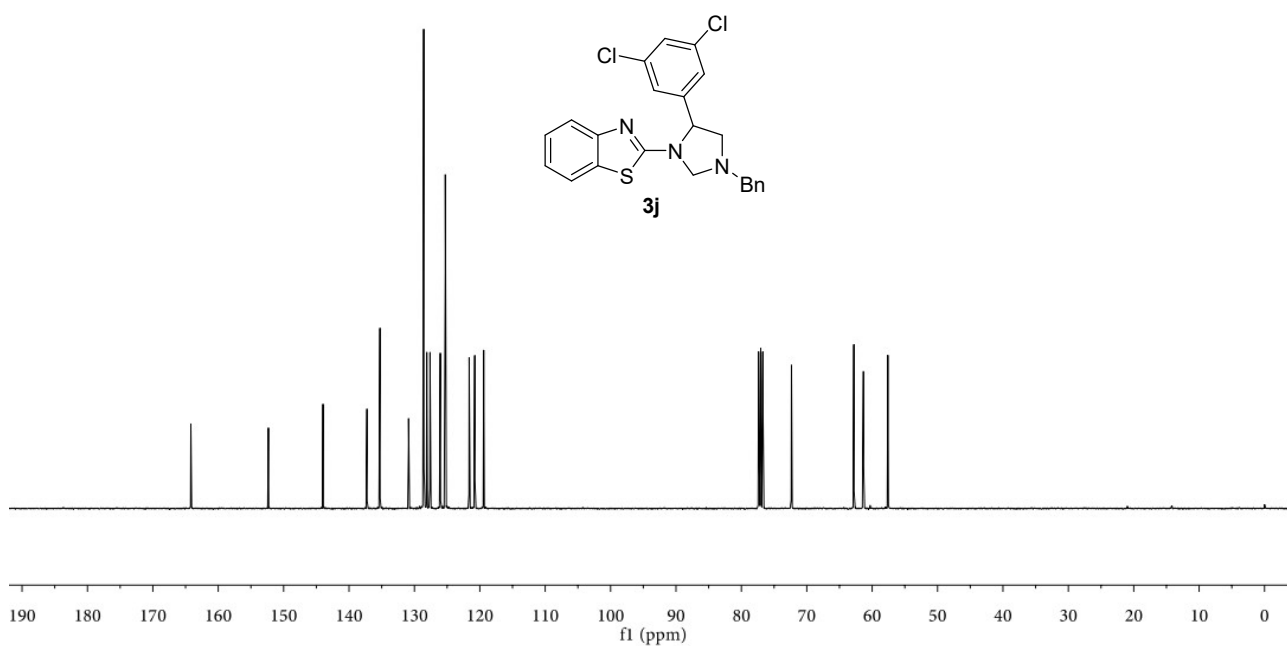

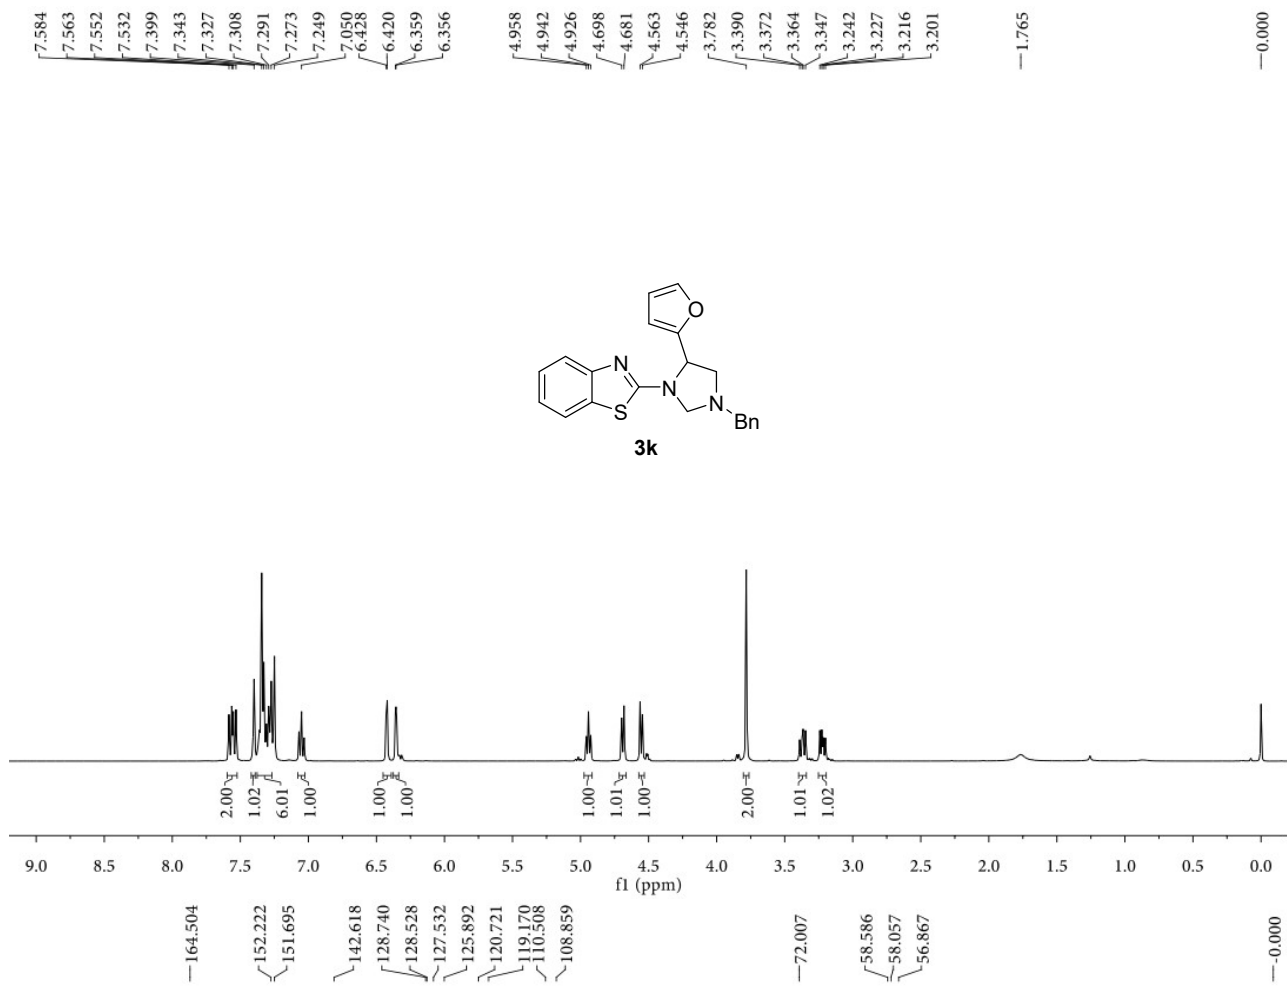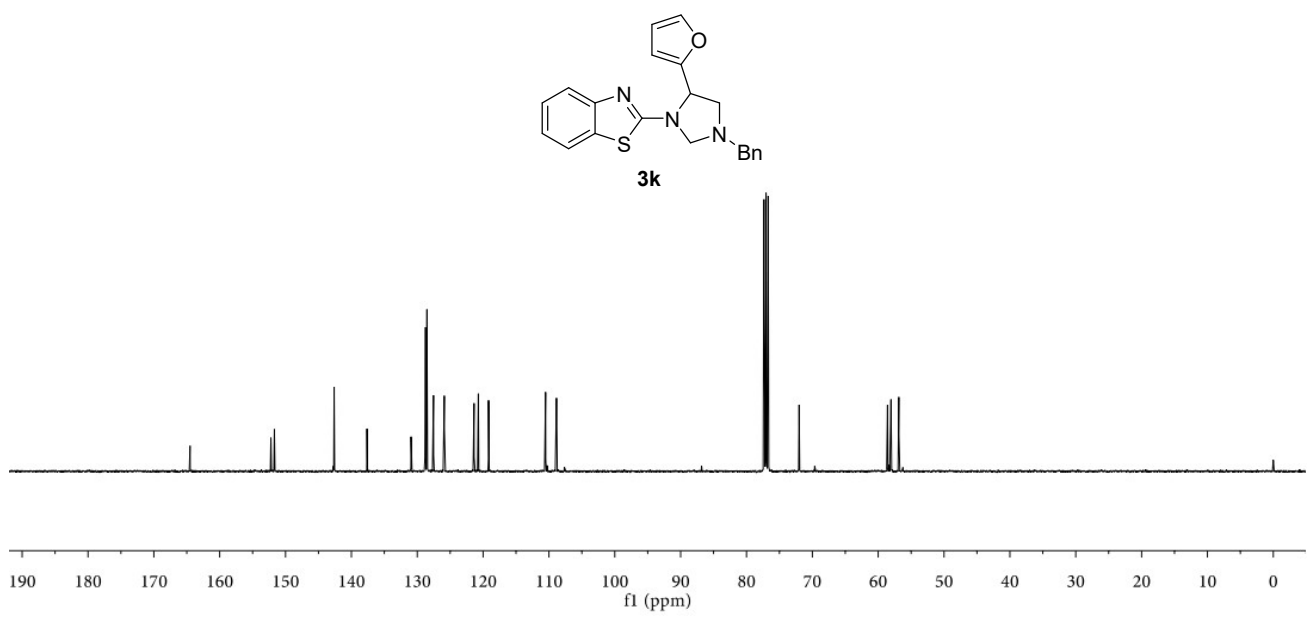

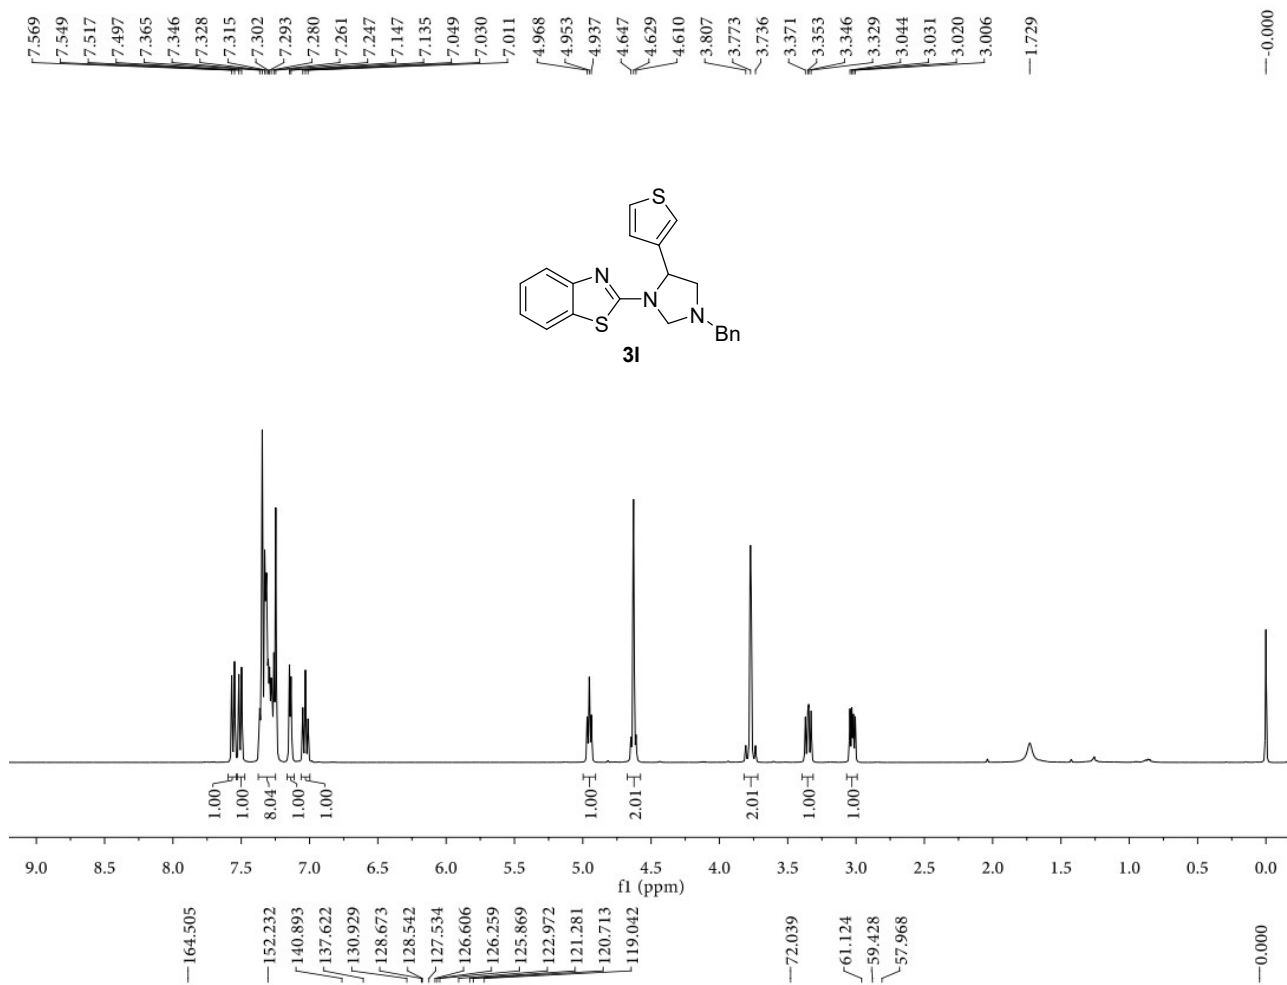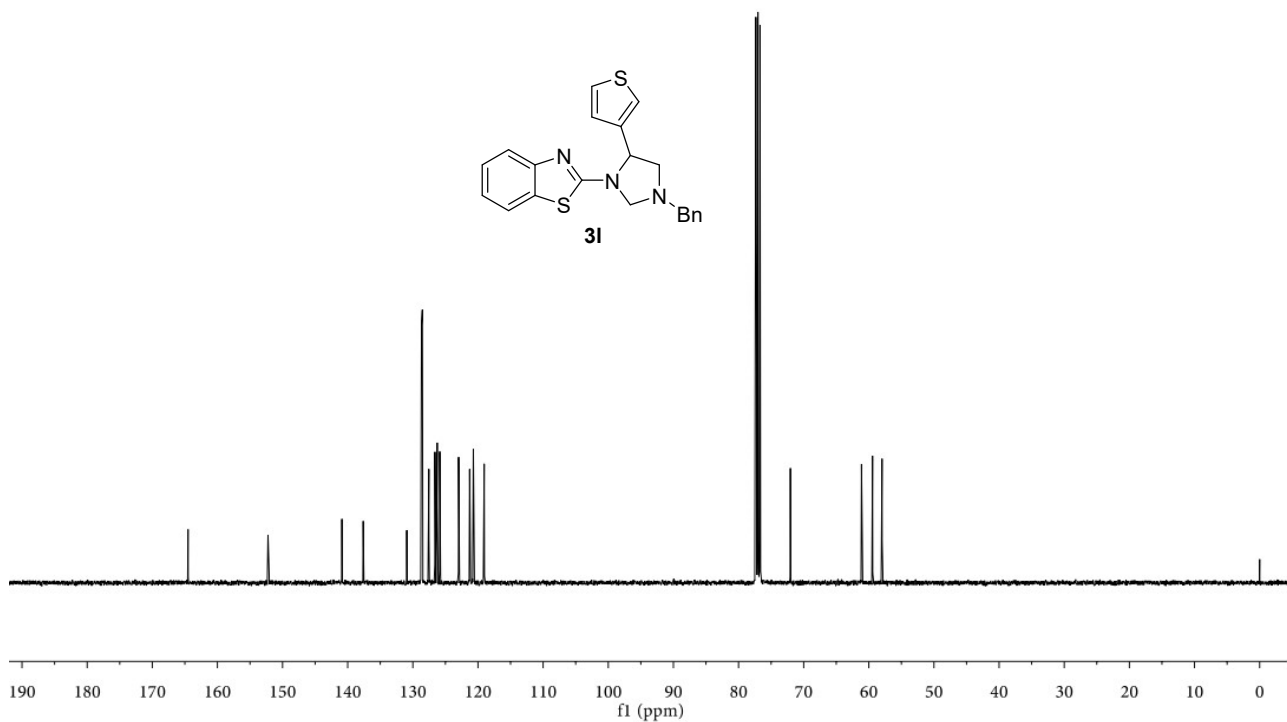

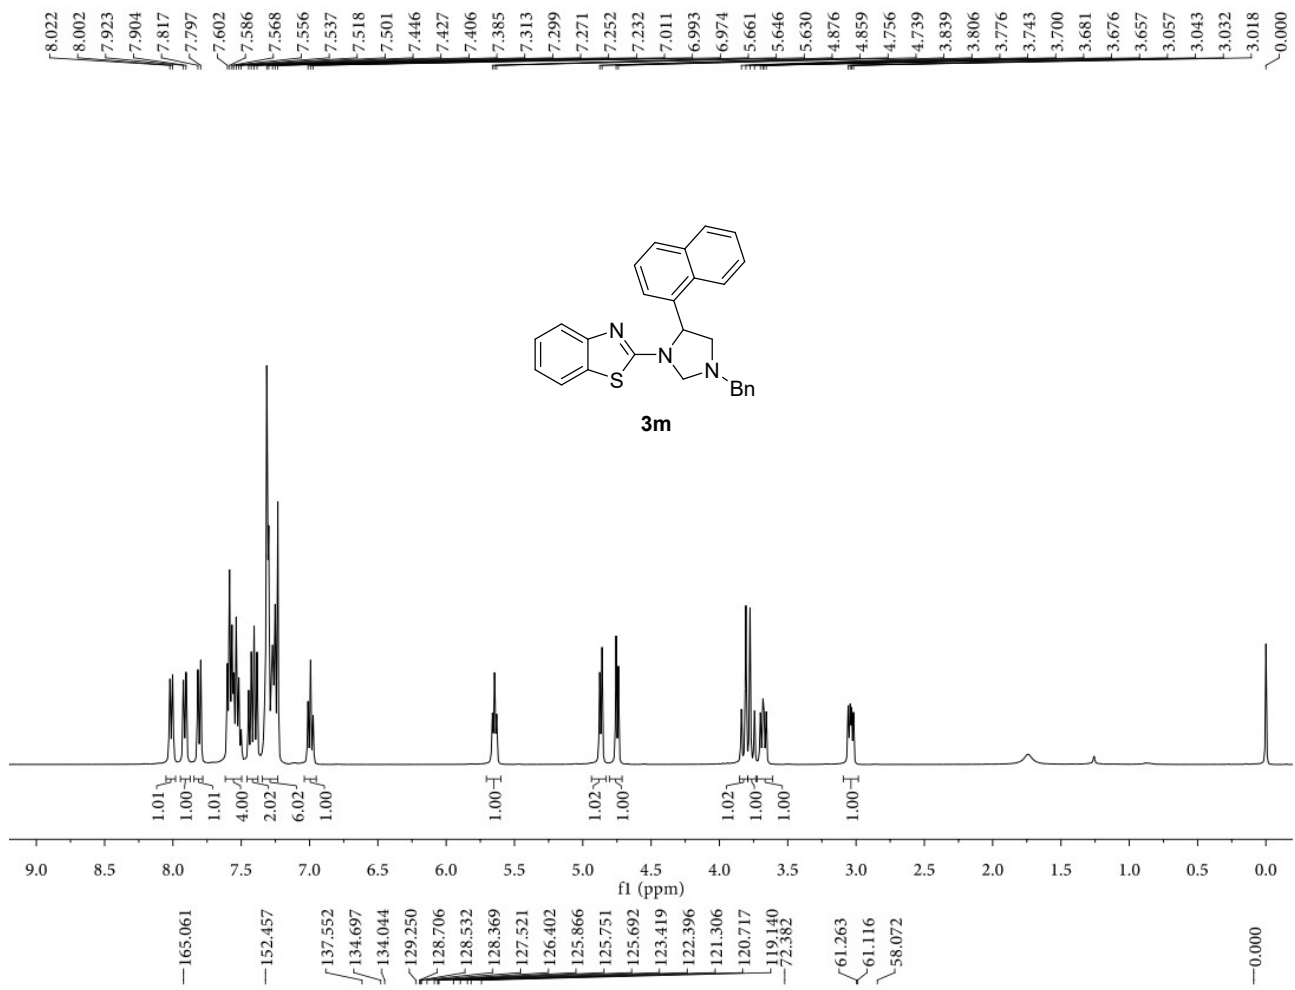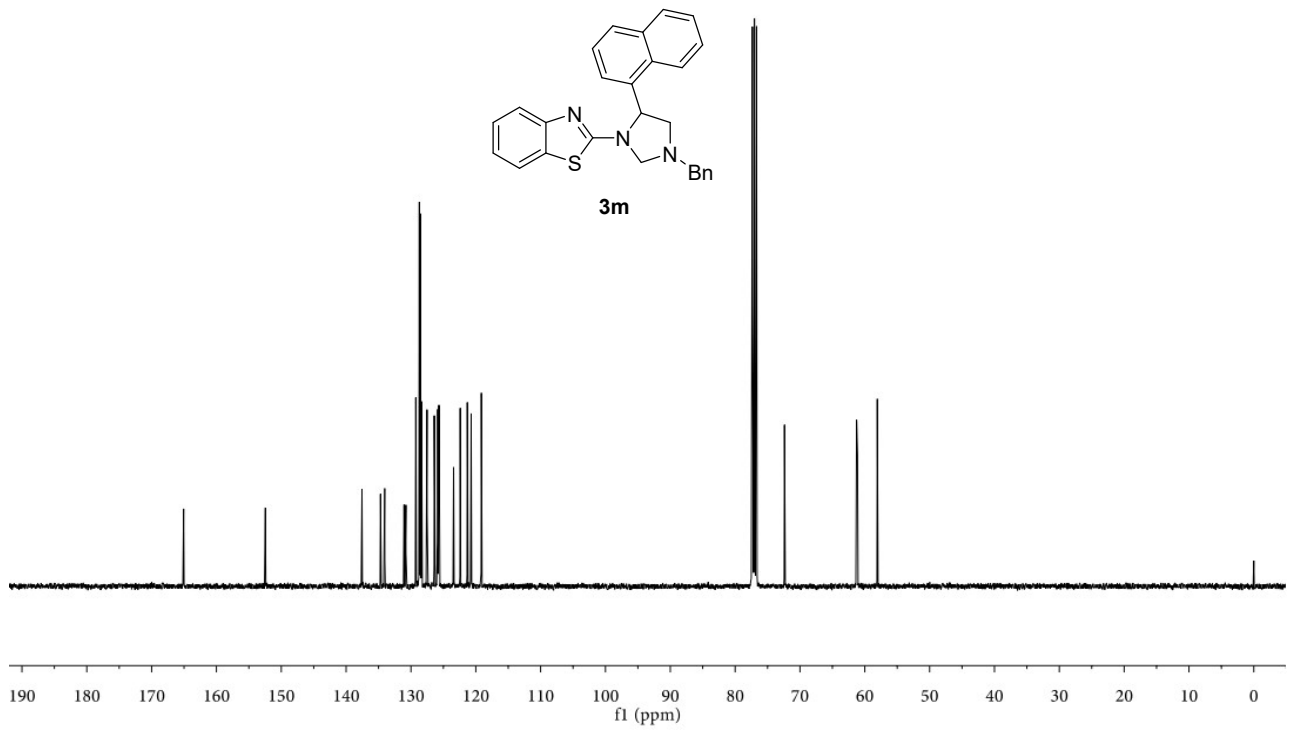



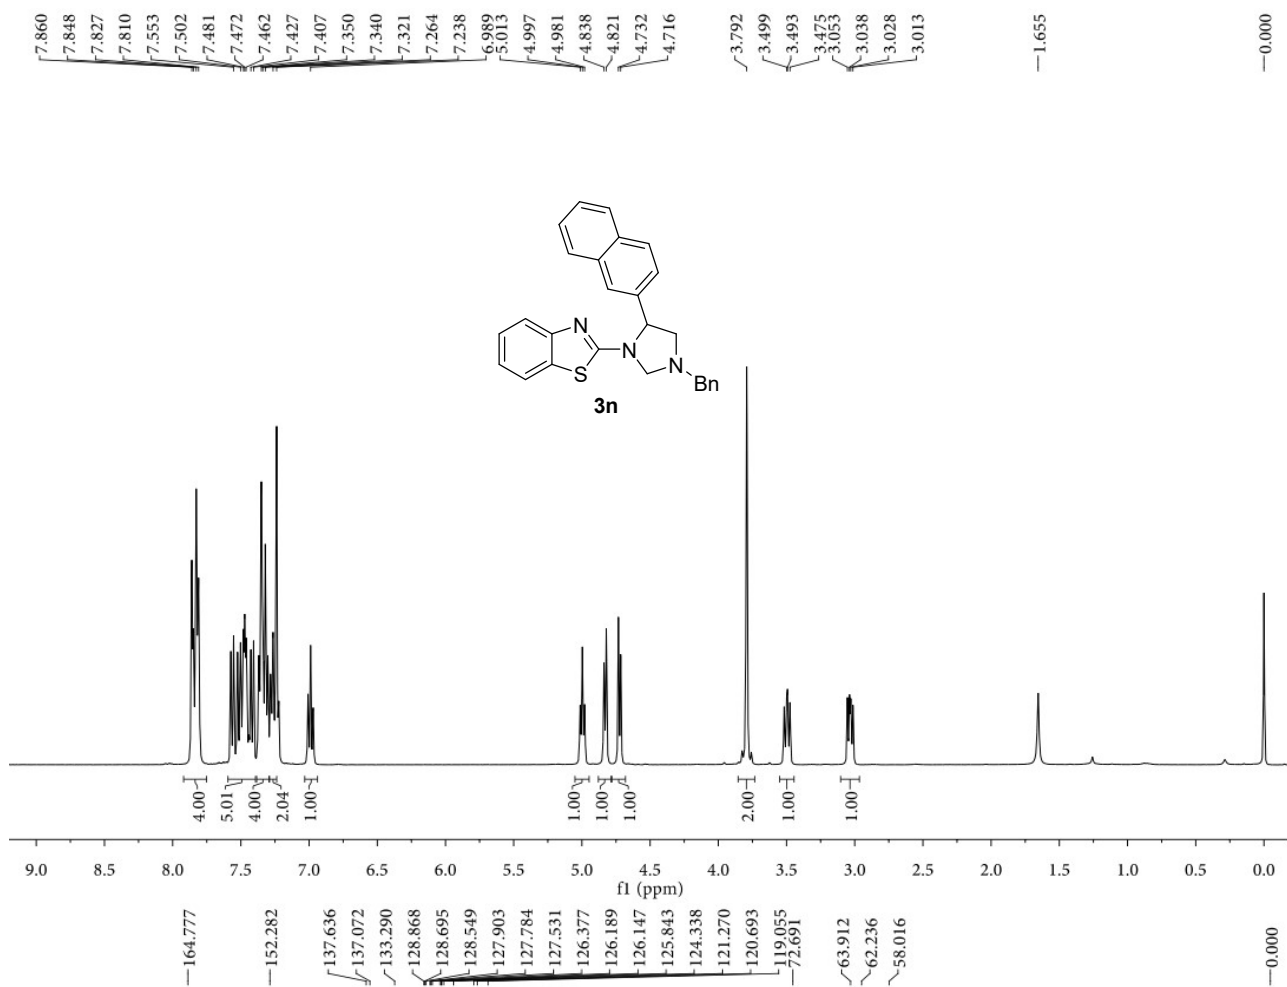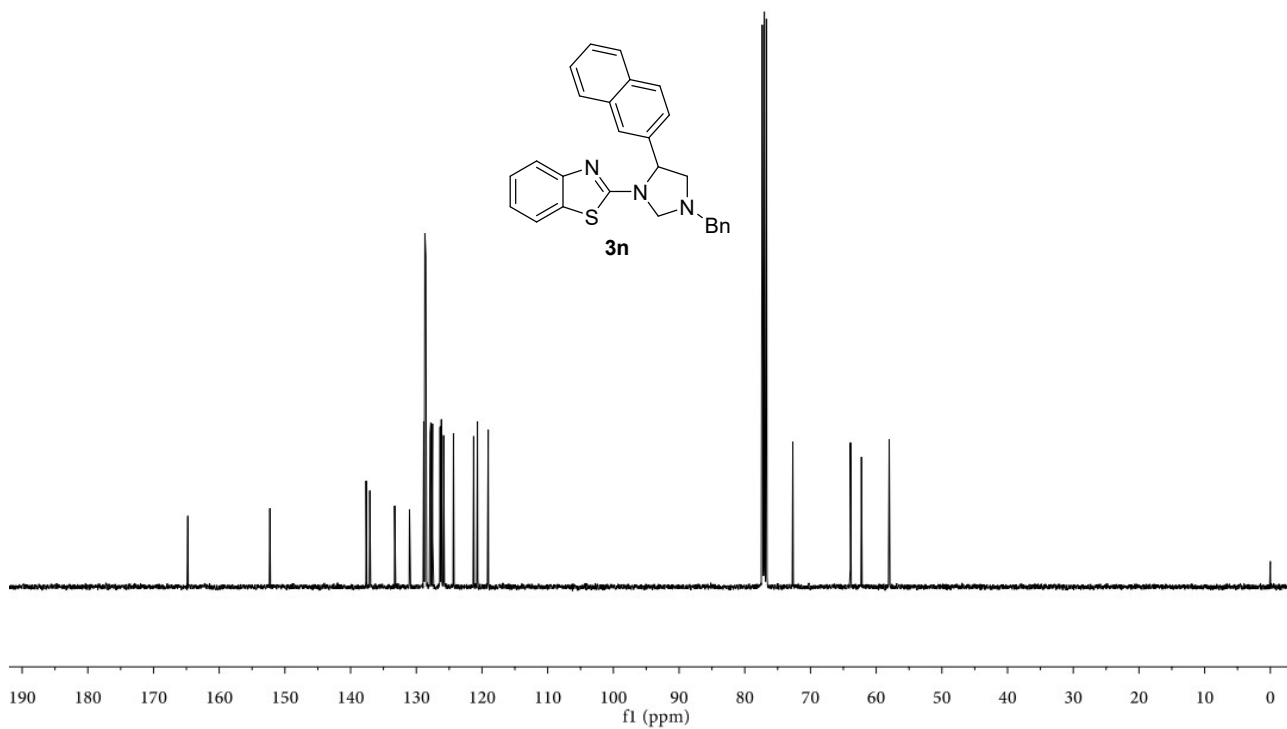

7.433  
7.414  
7.350  
7.330  
7.309  
7.292  
7.279  
7.239  
7.079  
7.061  
6.942  
6.923  
6.904

4.855  
4.839  
4.825  
4.624  
4.607

3.776  
3.743  
3.449  
3.442  
2.973  
2.956  
2.947  
2.931  
2.543

—1.657

—0.000

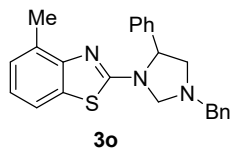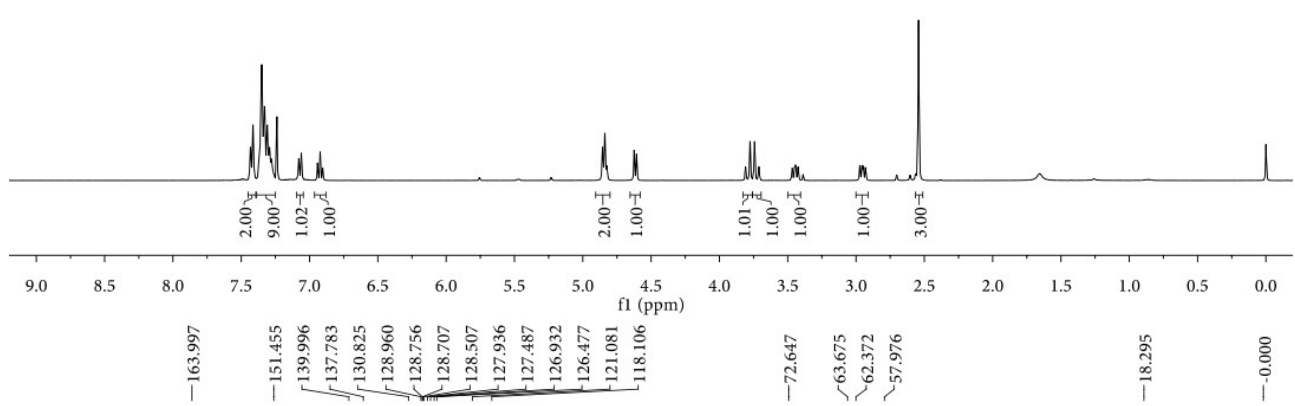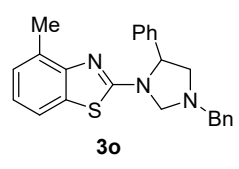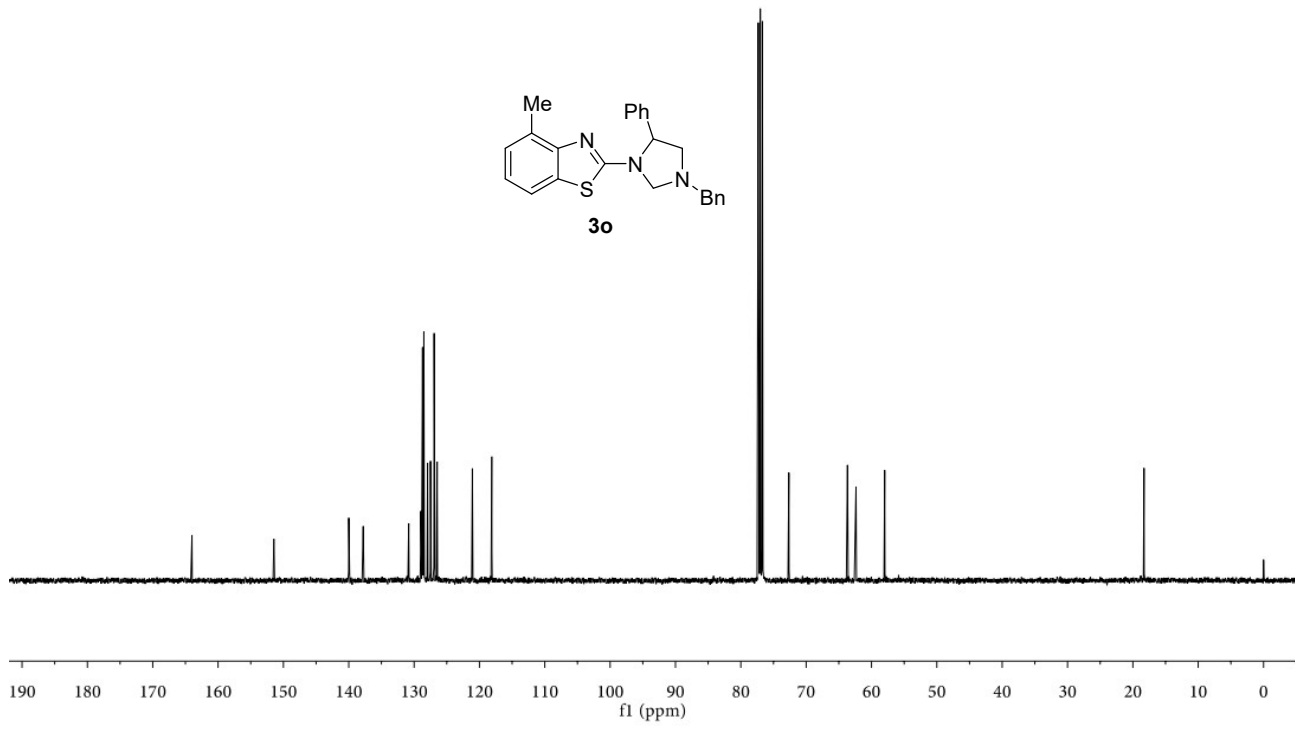

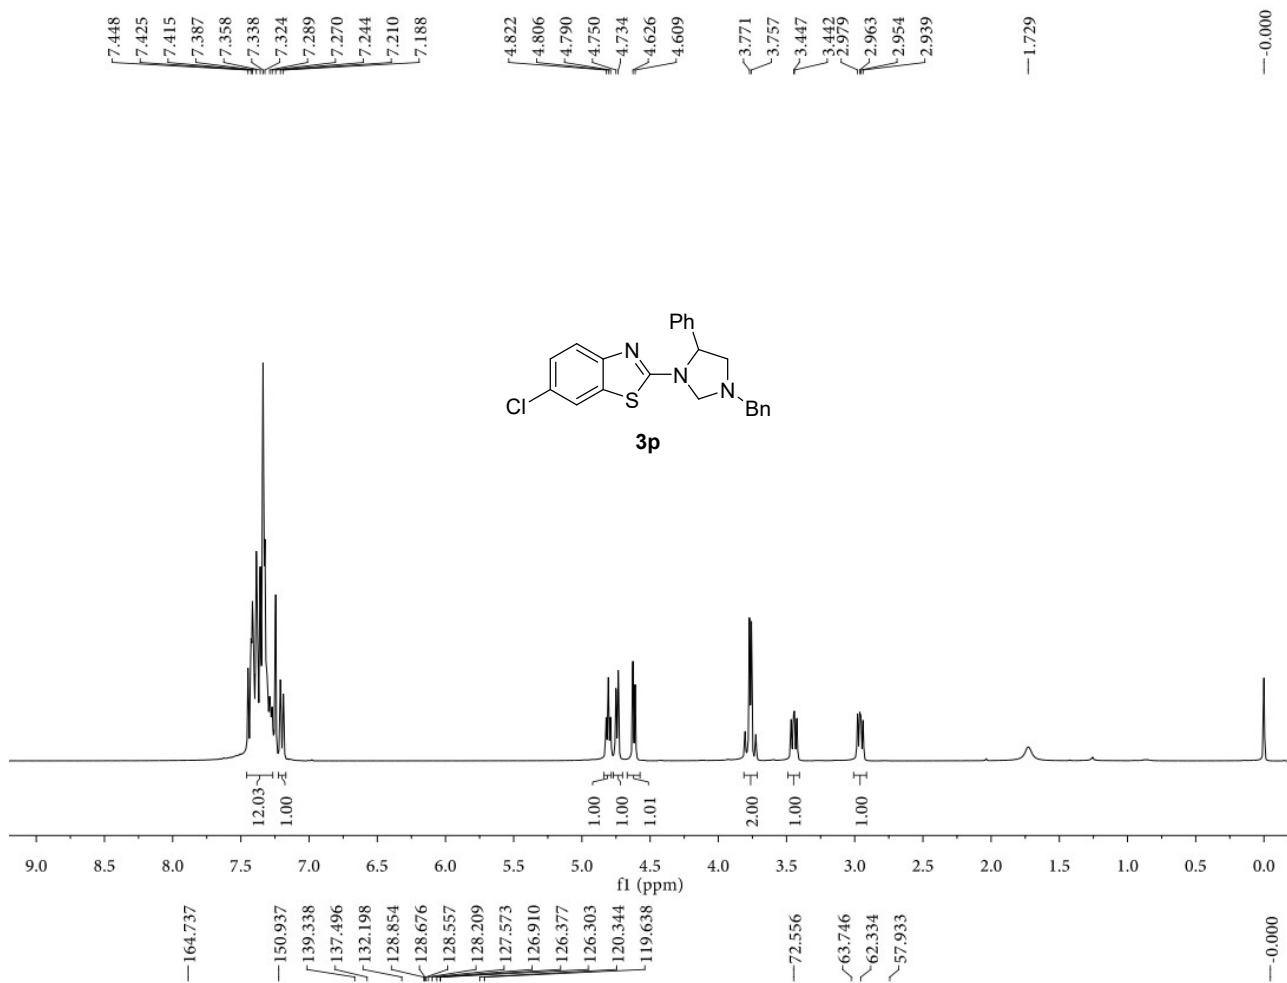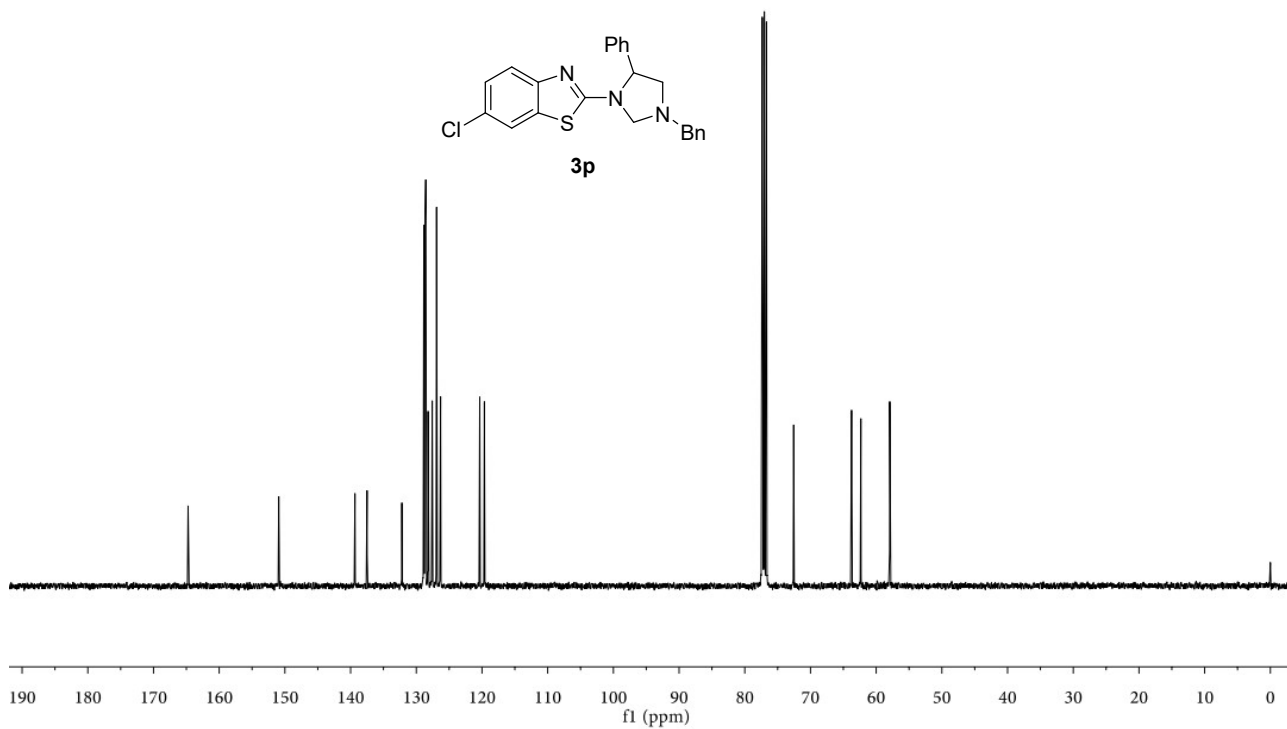

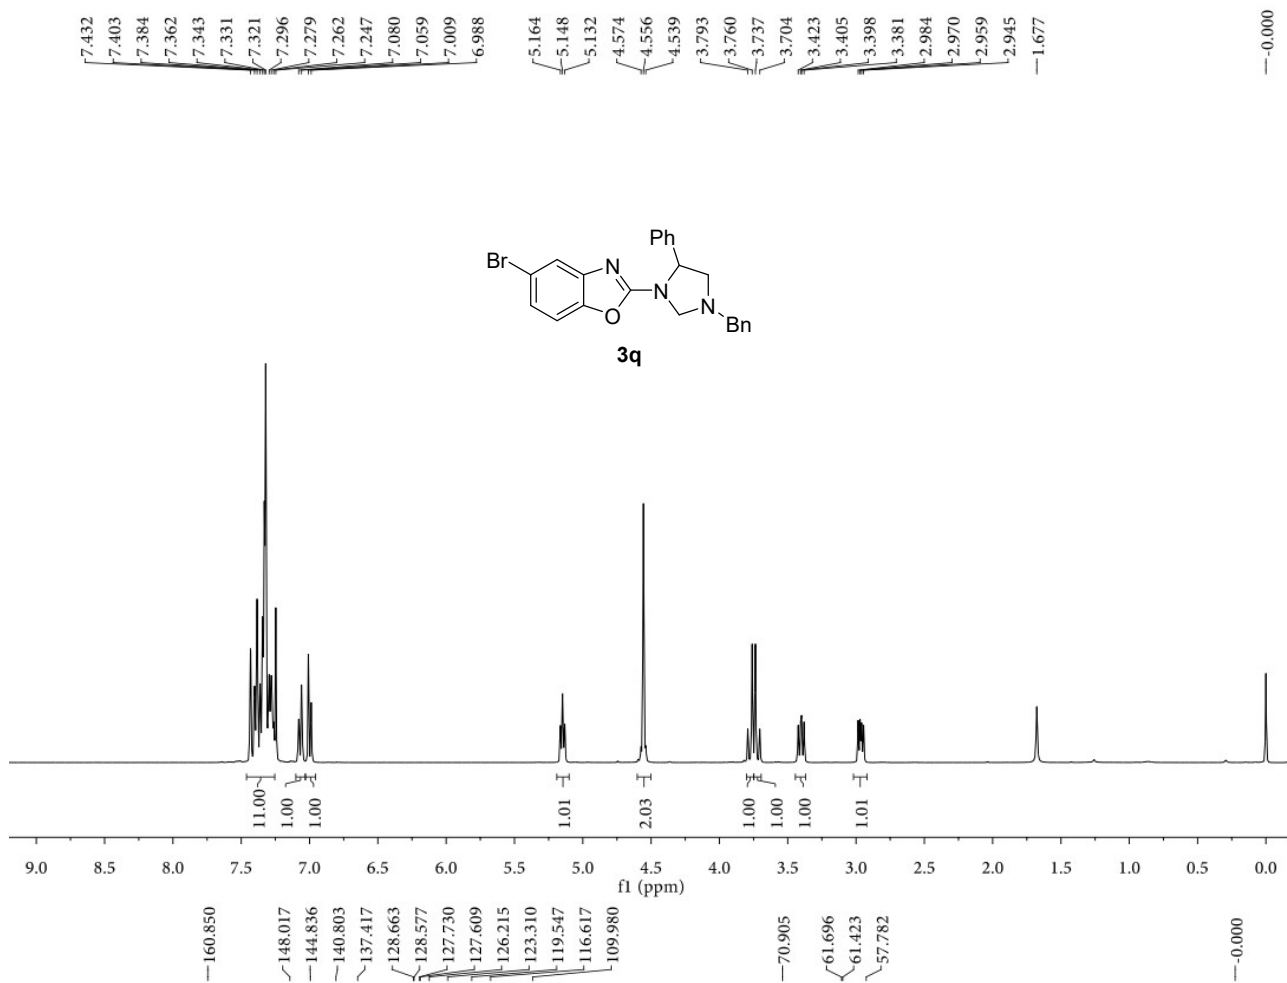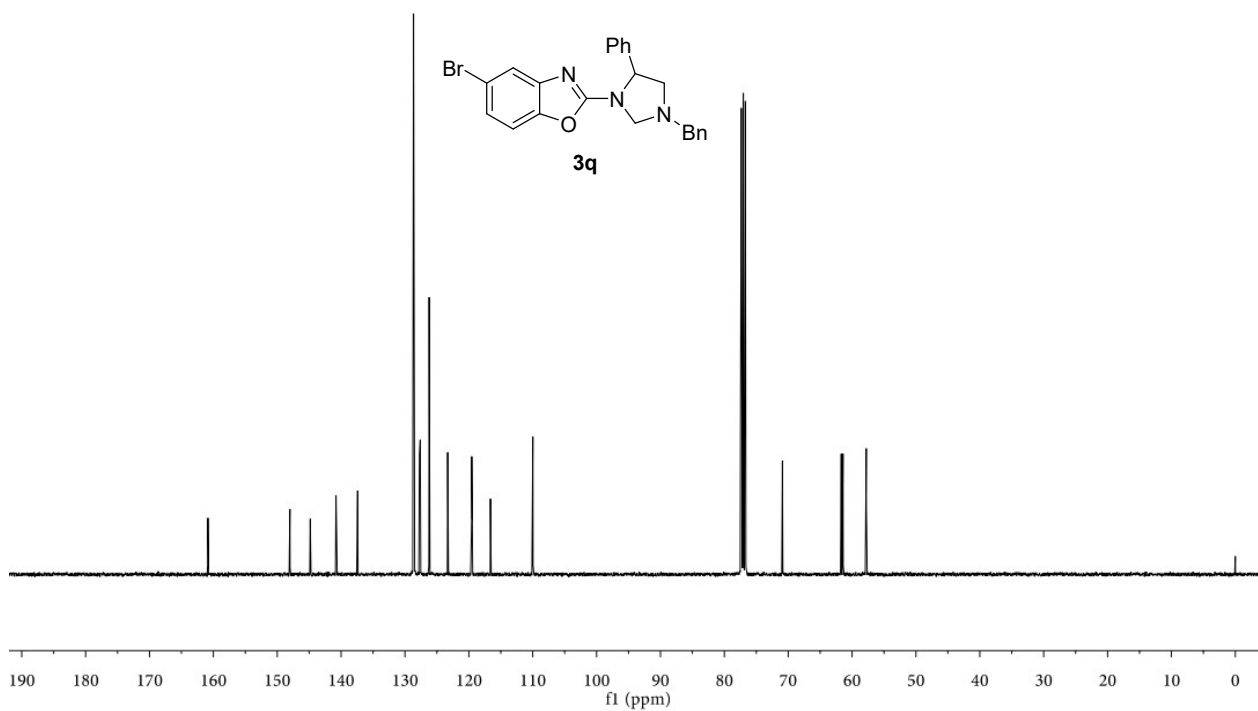

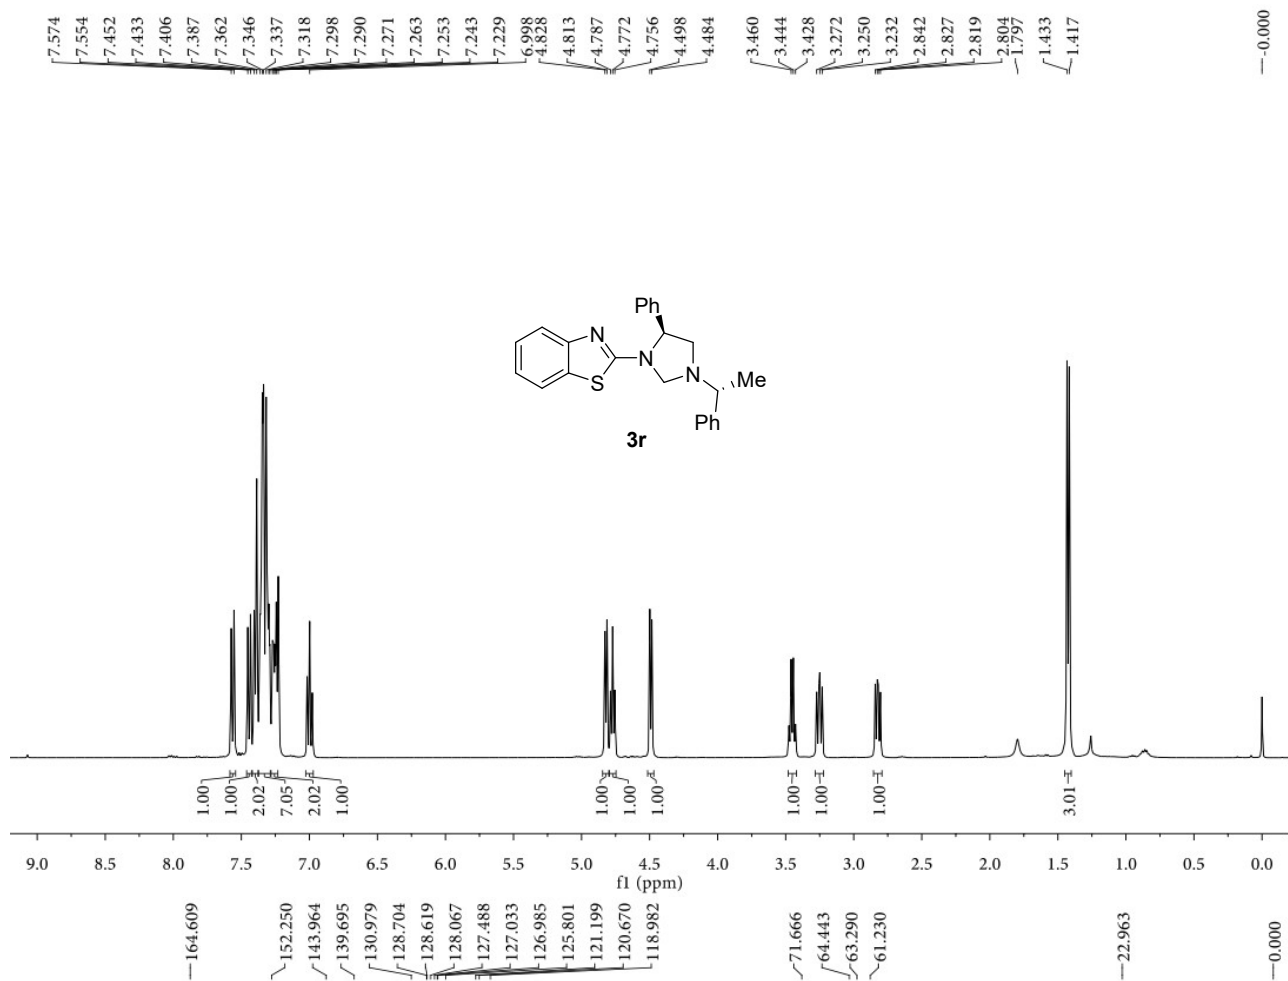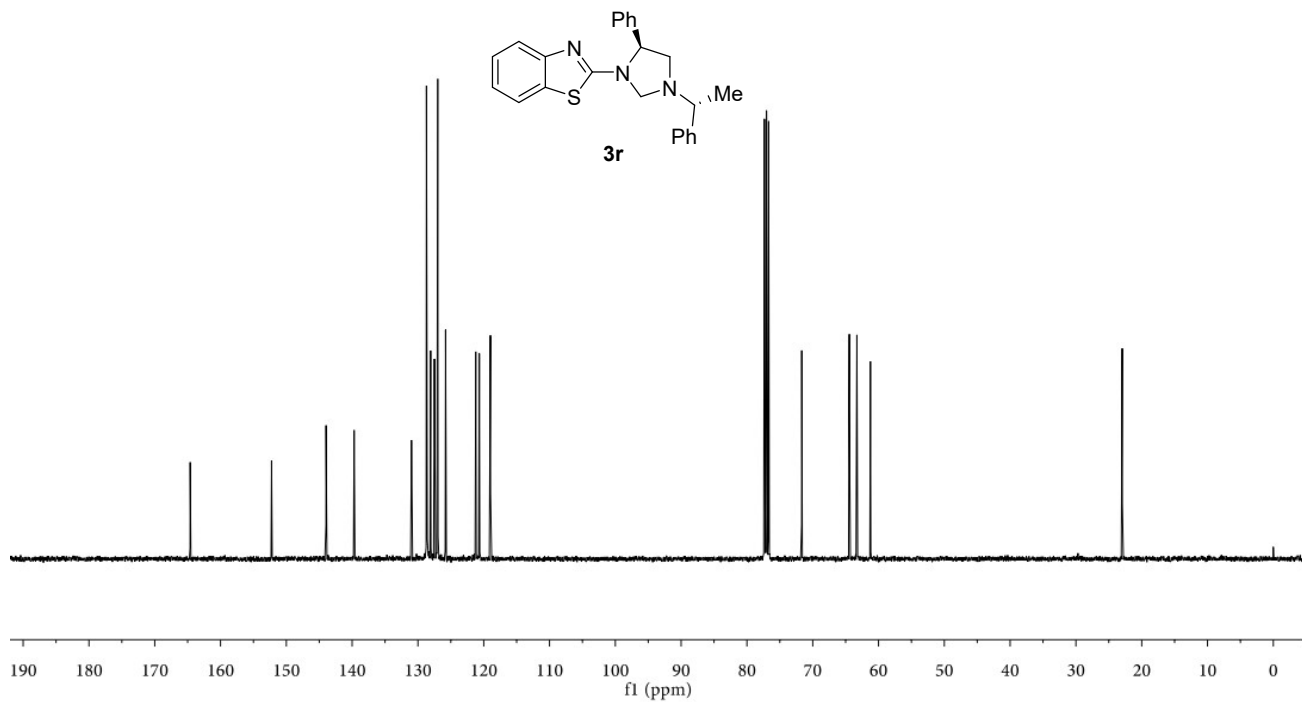

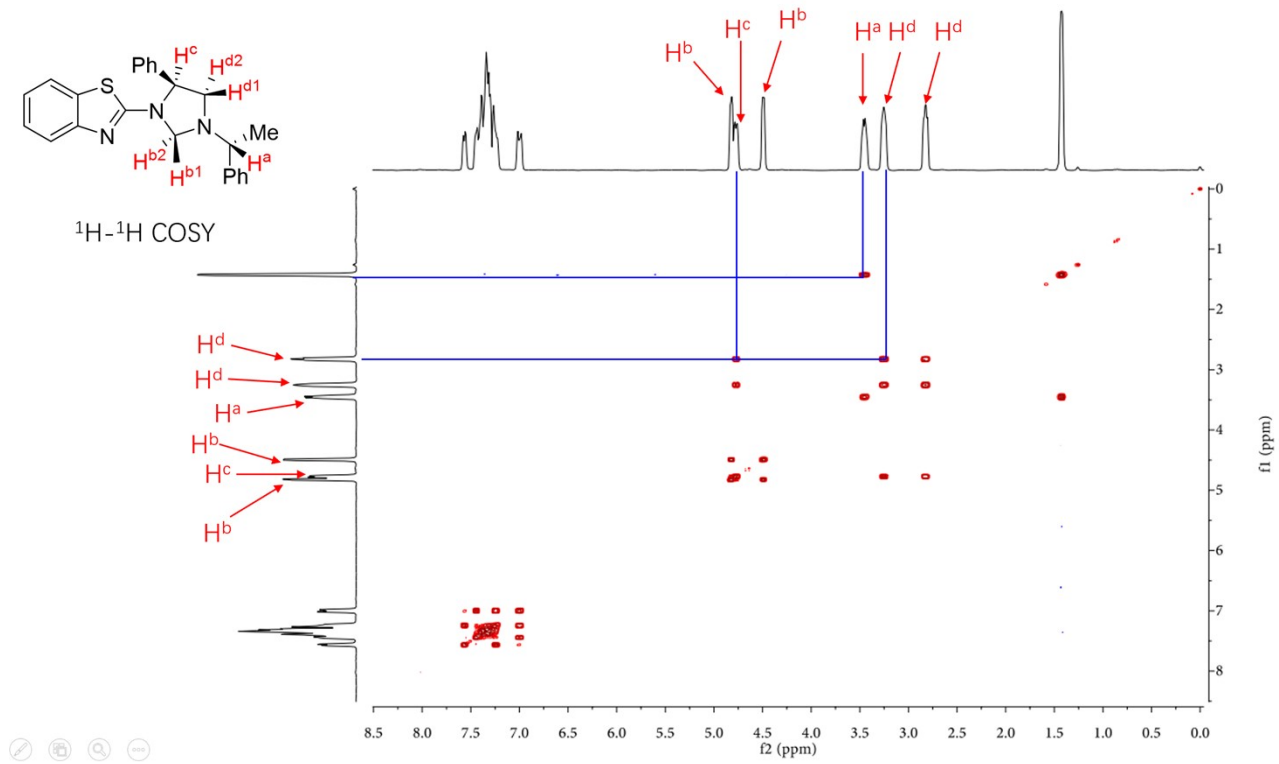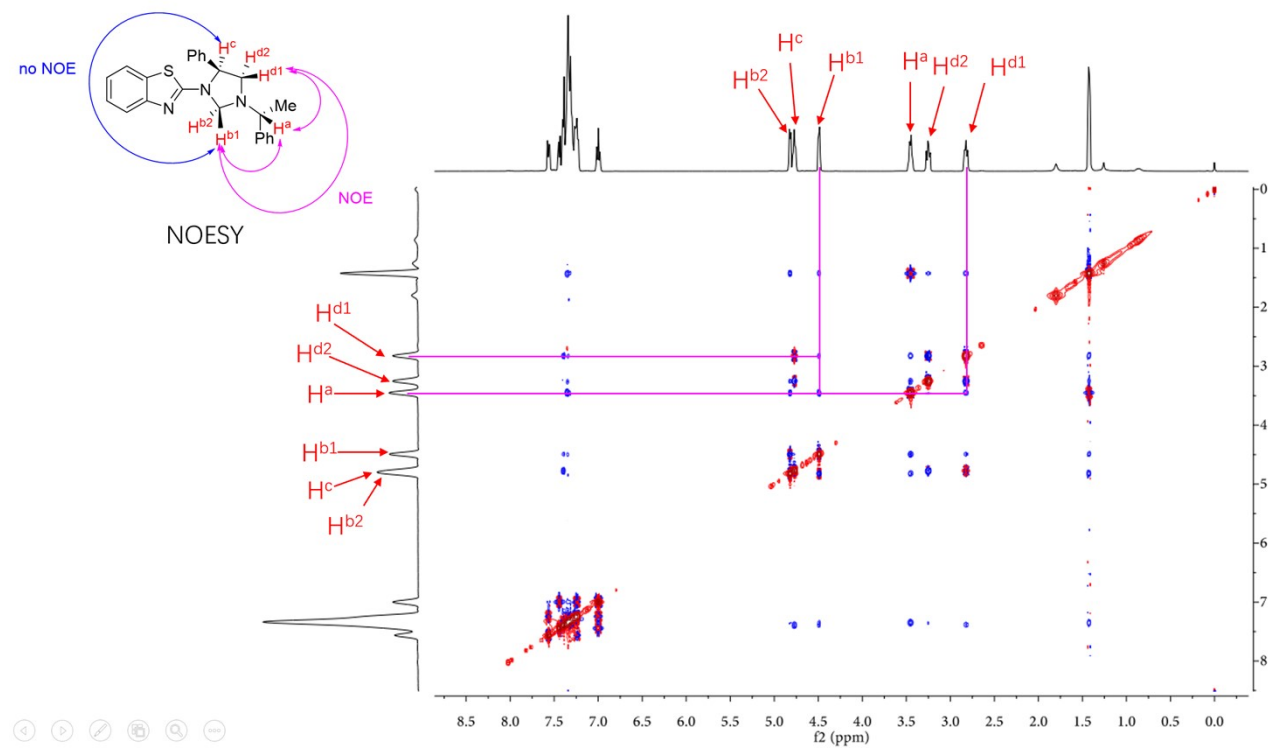

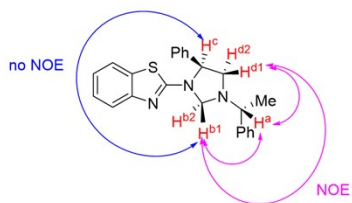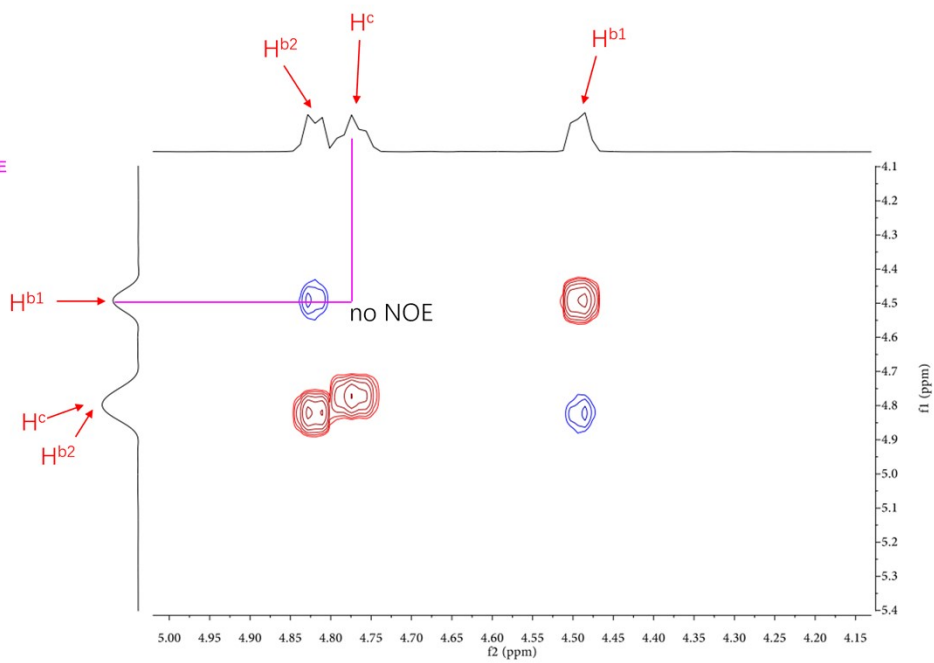

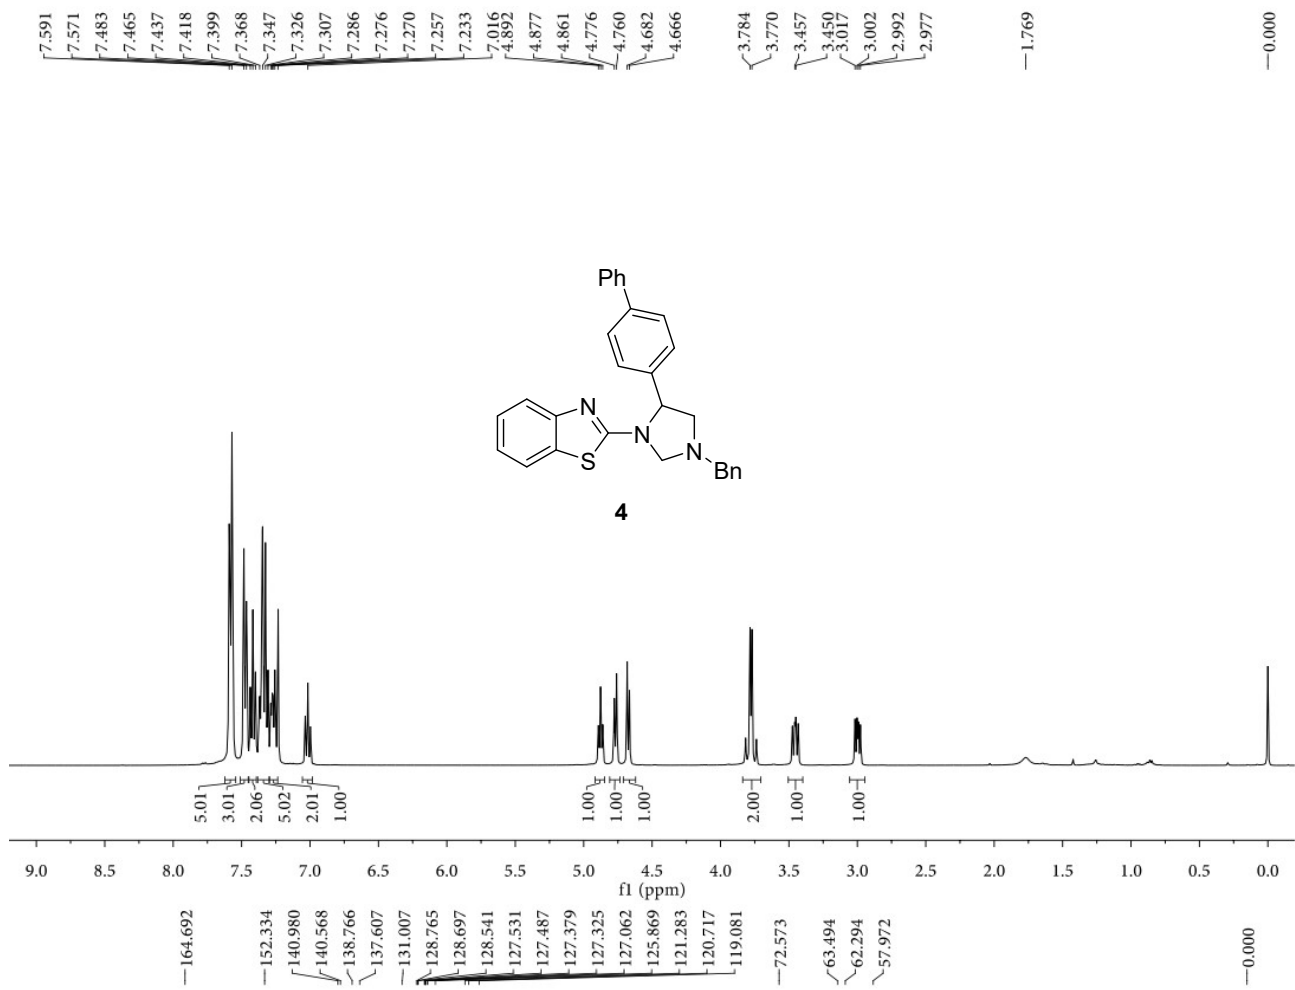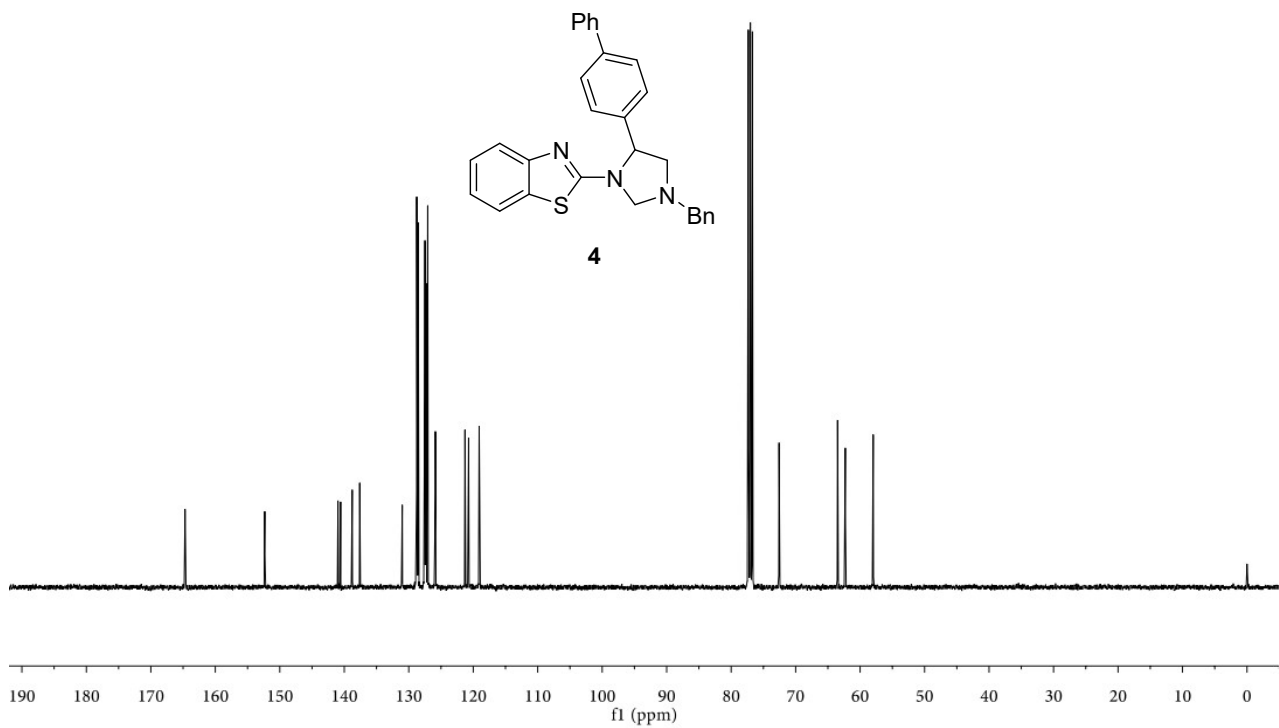

Supplement: d2ra04616d1.pdf [file d2ra04616d1.pdf]
